# Supplementary material for: Theoretical investigation on the functional group modulation of UV-Vis absorption profiles of triphenylamine derivatives
Source: Royal Society of Chemistry journal article supplement (doi:10.1039/d3cp01630g), 2023-01-01
Supplement: d3cp01630g2.pdf [file d3cp01630g2.pdf]

## Supplementary Material

### Theoretical investigation on functional group modulation of UV-Vis absorption profiles of triphenylamine derivatives

*Kun Gong,<sup>a,b,c</sup> Fang Xu,<sup>a,b,c</sup> Zhen Zhao,<sup>a,b,c</sup> Wei Li,<sup>a,b,c</sup> Dongzhi Liu,<sup>a,b,c</sup> Xueqin*

*Zhou,<sup>a,b,c,\*</sup> and Lichang Wang<sup>d,\*</sup>*

<sup>a</sup> School of Chemical Engineering and Technology, Tianjin University, Tianjin, 300350, PR China

<sup>b</sup> Collaborative Innovation Center of Chemical Science and Engineering, Tianjin, 300072, PR China

<sup>c</sup> Tianjin Engineering Research Center of Functional Fine Chemicals, Tianjin, 300350, PR China

<sup>d</sup> Department of Chemistry and Biochemistry; and the Materials Technology Center, Southern Illinois University, Carbondale, IL 62901, United States

Corresponding authors:

Xueqin Zhou (zhouxueqin@tju.edu.cn) and Lichang Wang (lwang@chem.siu.edu)

| <b>Contents</b> | <b>Page</b> | <b>Contents</b> | <b>Page</b> |
|-----------------|-------------|-----------------|-------------|
| Fig S1          | S1          | Table S1        | S16         |
| Fig S2          | S2          | Table S2        | S16         |
| Fig S3          | S3          | Table S3        | S17         |
| Fig S4          | S4          | Table S4        | S17         |
| Fig S5          | S5          | Table S5        | S18         |
| Fig S6          | S6          | Table S6        | S19         |
| Fig S7          | S7          | Table S7        | S20         |
| Fig S8          | S8          | Table S8        | S22         |
| Fig S9          | S9          | Table S9        | S23         |
| Fig S10         | S10         | Table S10       | S23         |
| Fig S11         | S11         | Table S11       | S24         |
| Fig S12         | S12         | Table S12       | S24         |
| Fig S13         | S12         | Table S13       | S25         |
| Fig S14         | S13         | Table S14       | S29         |
| Fig S15         | S13         | Table S15       | S37         |
| Fig S16         | S14         | Table S16       | S45         |
| Fig S17         | S14         | Table S17       | S51         |
| Fig S18         | S15         | Table S18       | S52         |
|                 |             | Table S19       | S53         |
|                 |             | Table S20       | S54         |
|                 |             | Table S21       | S55         |
|                 |             | Table S22       | S63         |
|                 |             | Table S23       | S73         |
|                 |             | Table S24       | S85         |
|                 |             | Reference       | S96         |

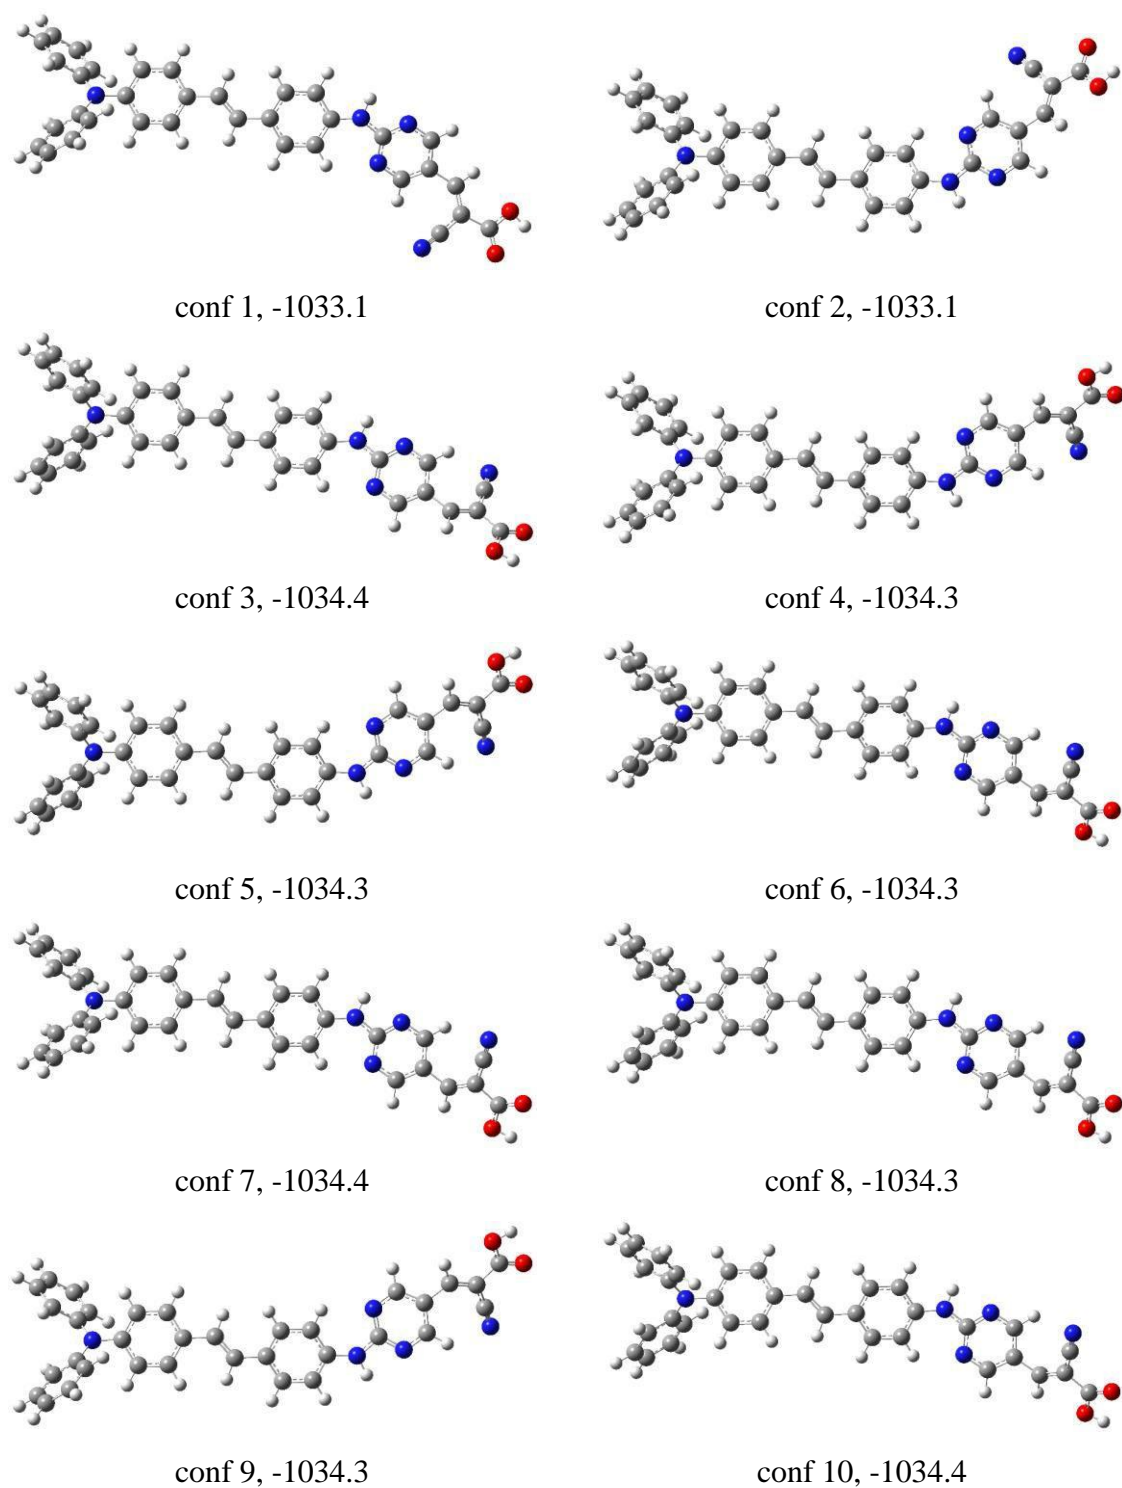

Fig S1. The 10 lowest conformers and their potential energy (in  $\text{kJ mol}^{-1}$ ) of TPA-Pyc obtained by simulated annealing process.

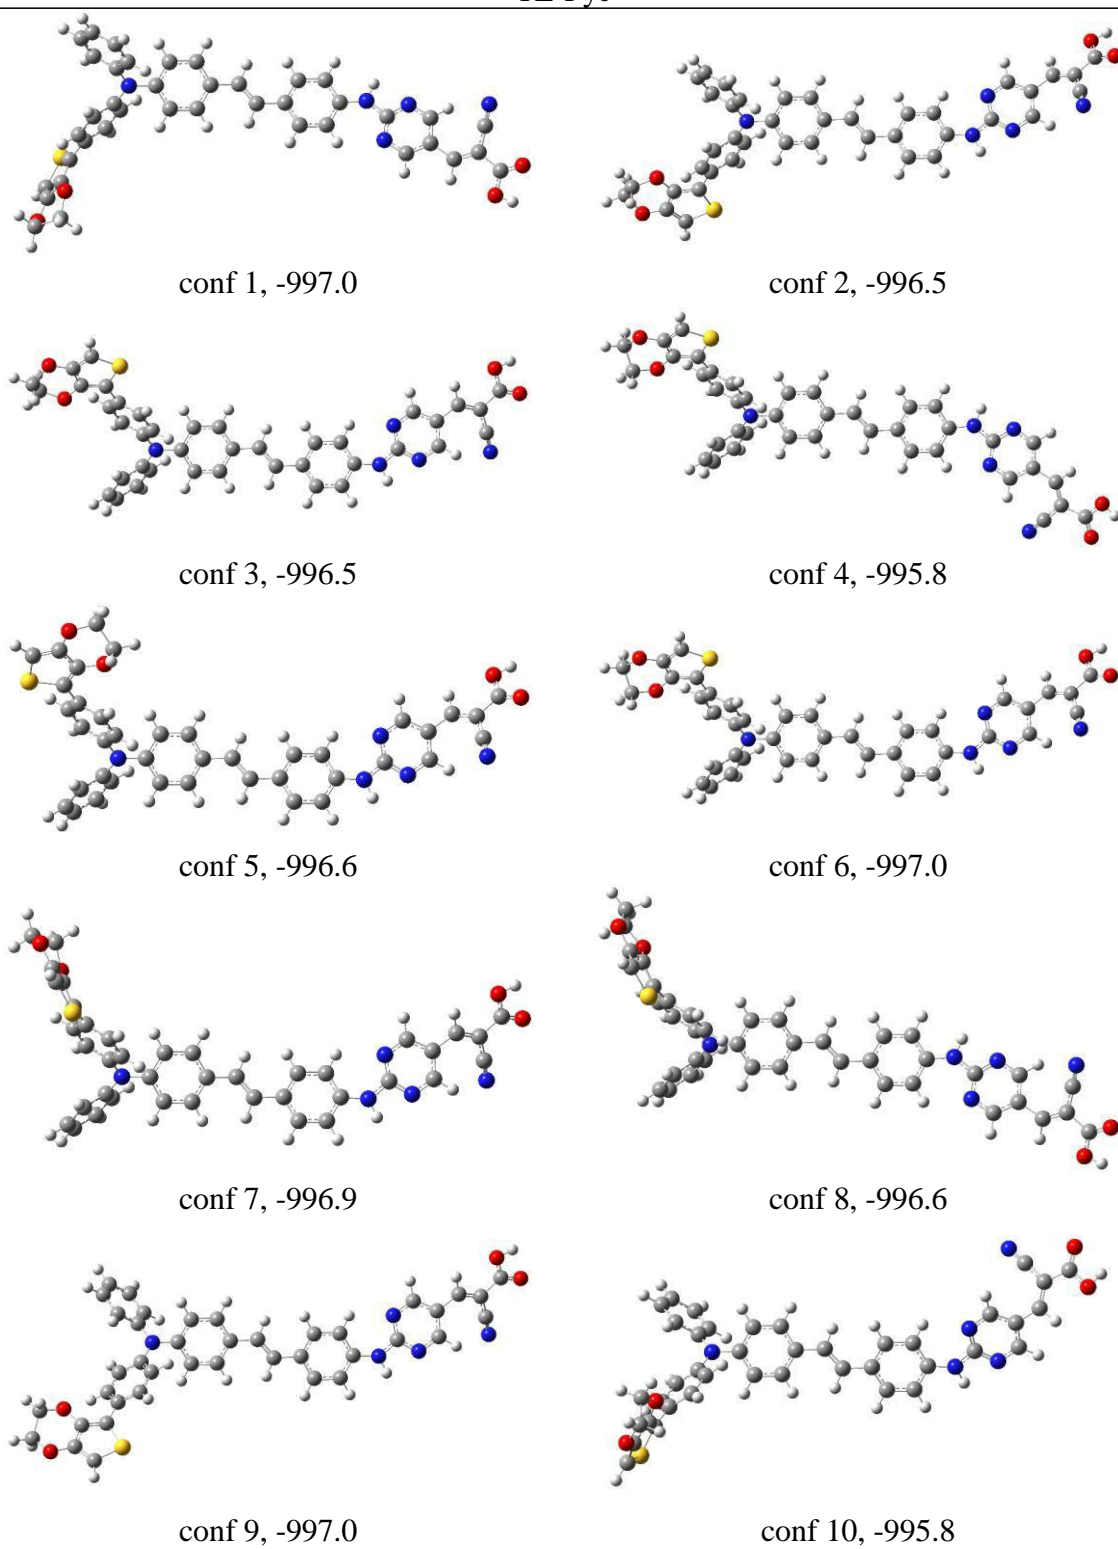

Fig S2. The 10 lowest conformers and their potential energy (in  $\text{kJ mol}^{-1}$ ) of TE-Pyc obtained by simulated annealing process.

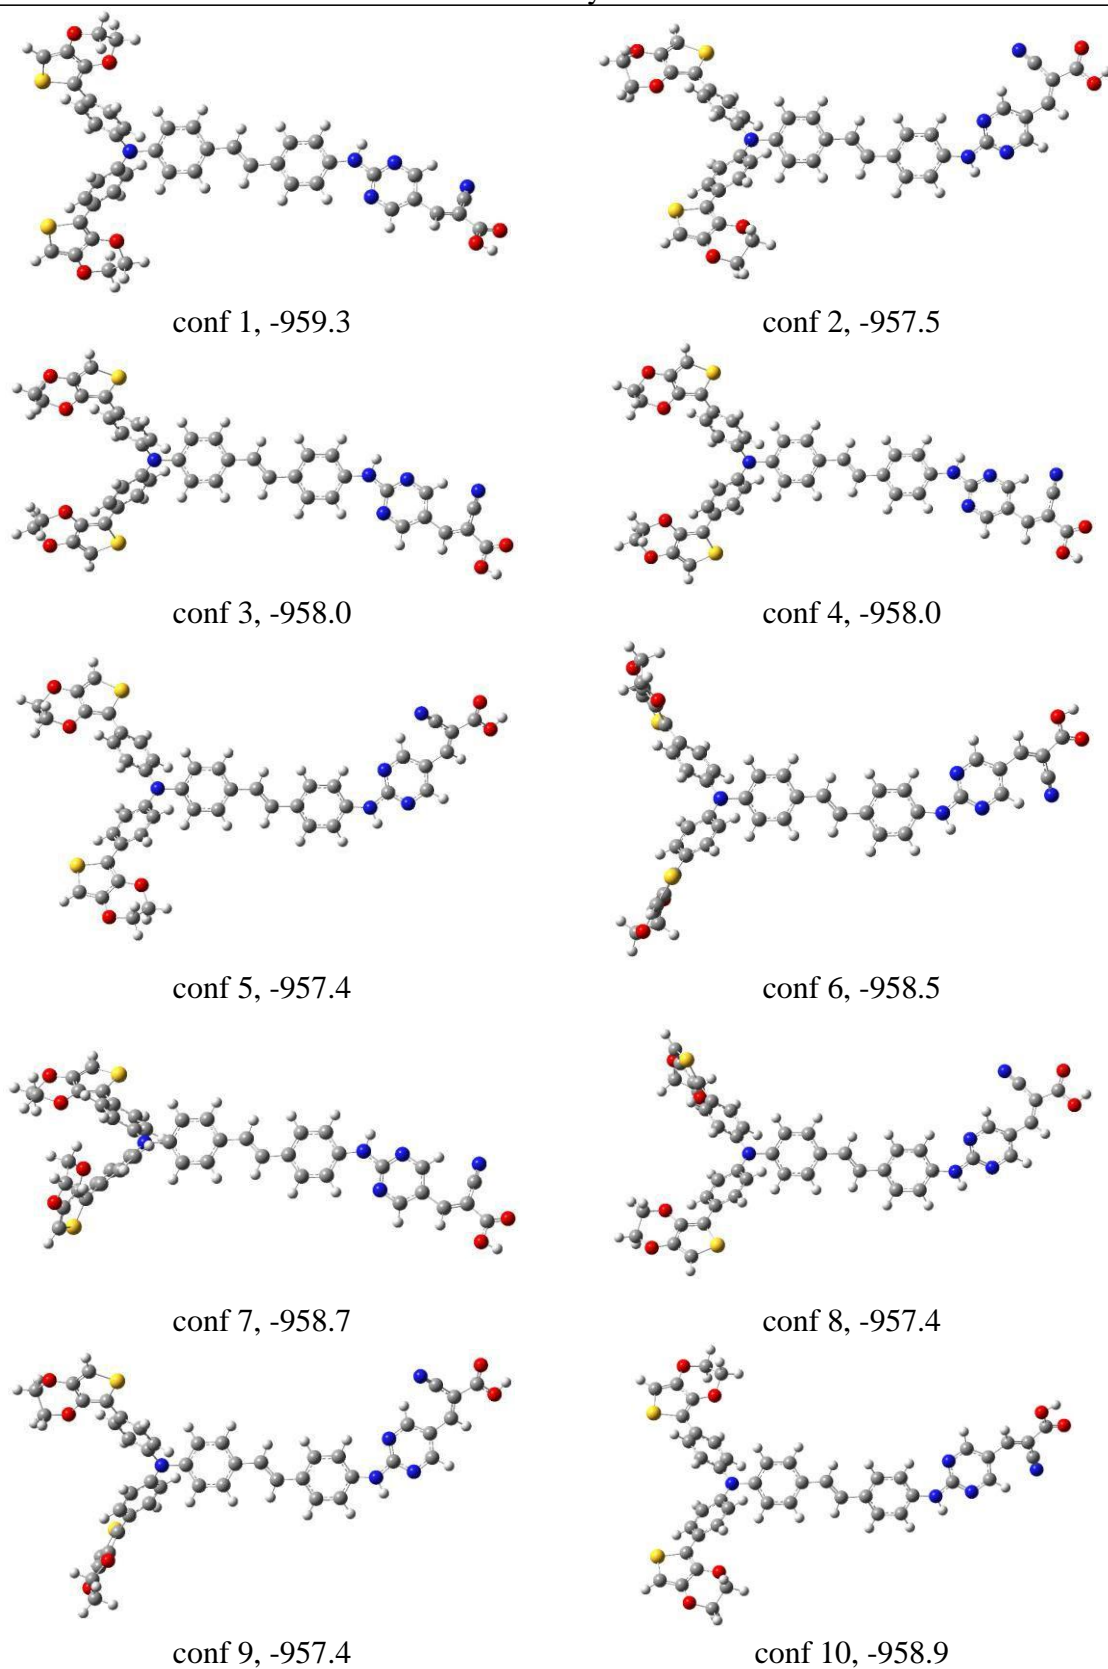

Fig S3. The 10 lowest conformers and their potential energy (in  $\text{kJ mol}^{-1}$ ) of ETE-Pyc obtained by simulated annealing process.

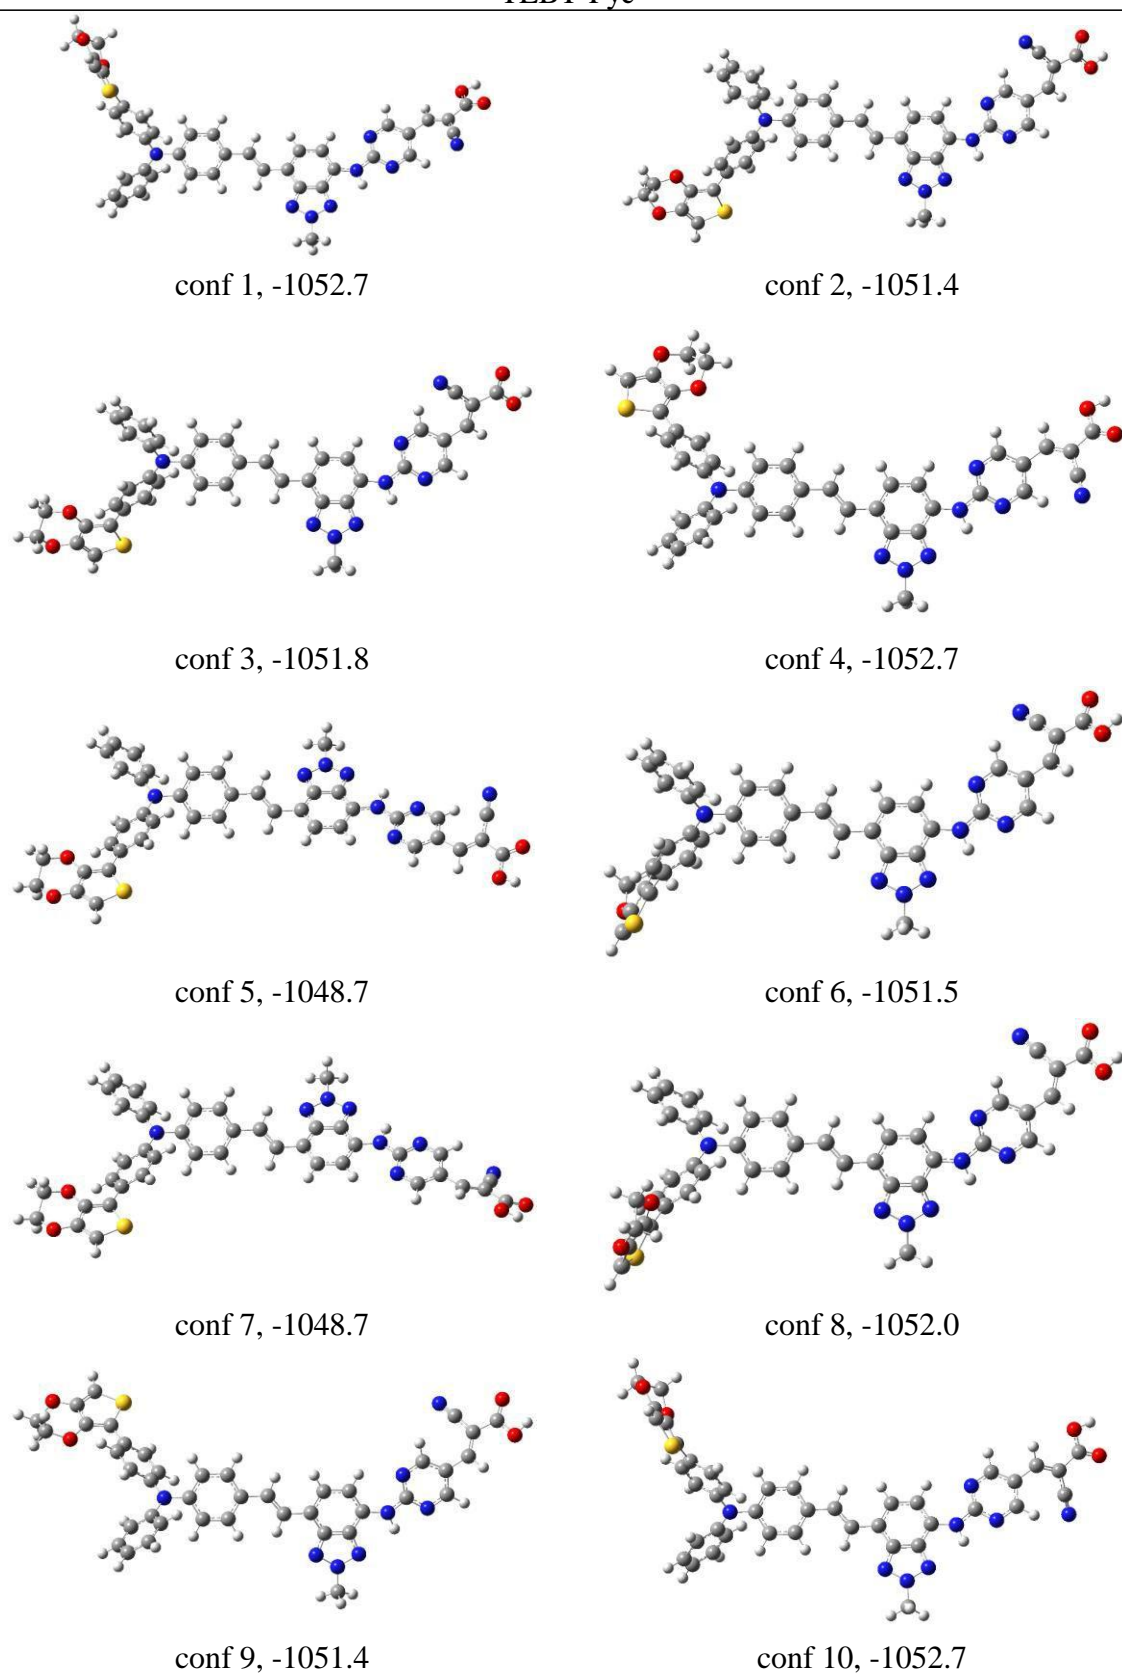

Fig S4. The 10 lowest conformers and their potential energy (in  $\text{kJ mol}^{-1}$ ) of TEBT-Pyc obtained by simulated annealing process.

| TPA-Pyc |                                                                                            |                                                                                              |
|---------|--------------------------------------------------------------------------------------------|----------------------------------------------------------------------------------------------|
|         | toluene                                                                                    | dichloromethane                                                                              |
| conf 1  | 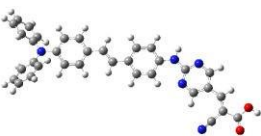<br>38.1% | <br>39.5% |
| conf 2  | <br>22.2% | <br>24.7% |
| conf 3  | <br>14.8% | <br>11.8% |
| conf 4  | <br>25.0% | <br>23.9% |

Fig S5. The B3LYP/6-311G(d,p) optimized geometries of the shortlisted conformations obtained from simulated annealing process of TPA-Pyc in toluene and dichloromethane.

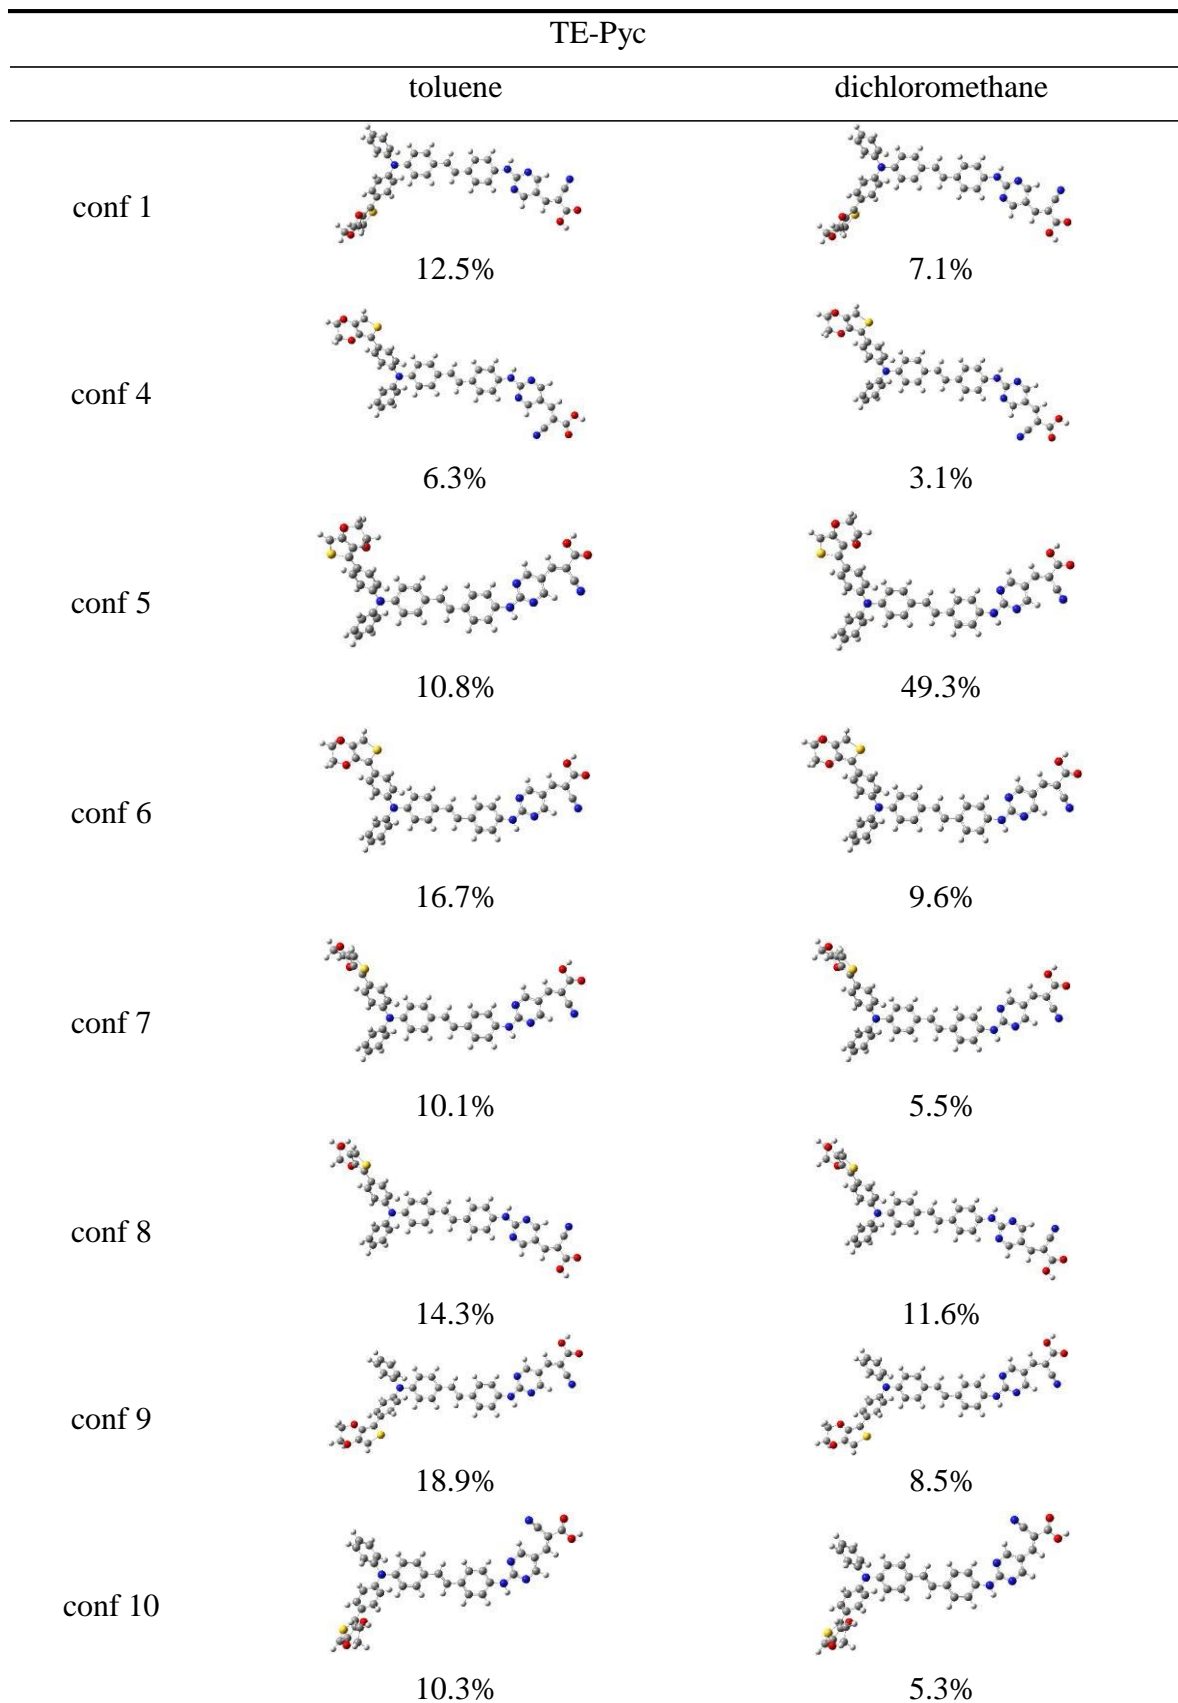

Fig S6. The B3LYP/6-311G(d,p) optimized geometries of shortlisted conformations obtained from simulated annealing process of TE-Pyc in toluene and dichloromethane.



| ETE-Pyc |                                                                                             |                                                                                                |
|---------|---------------------------------------------------------------------------------------------|------------------------------------------------------------------------------------------------|
|         | toluene                                                                                     | dichloromethane                                                                                |
| conf 1  | 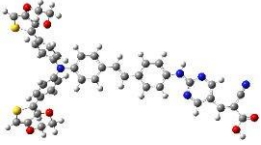<br>3.7%   | <br>2.8%    |
| conf 2  | <br>3.9%   | <br>4.8%    |
| conf 3  | <br>3.0%   | <br>3.9%    |
| conf 6  | <br>62.7% | <br>67.8%  |
| conf 7  | <br>3.5% | <br>3.0%  |
| conf 8  | <br>7.0% | <br>5.4%  |
| conf 9  | <br>6.7% | <br>2.2%  |
| conf 10 | <br>9.4% | <br>10.2% |

Fig S7. The B3LYP/6-311G(d,p) optimized geometries of shortlisted conformations obtained from simulated annealing process of ETE-Pyc in toluene and dichloromethane.

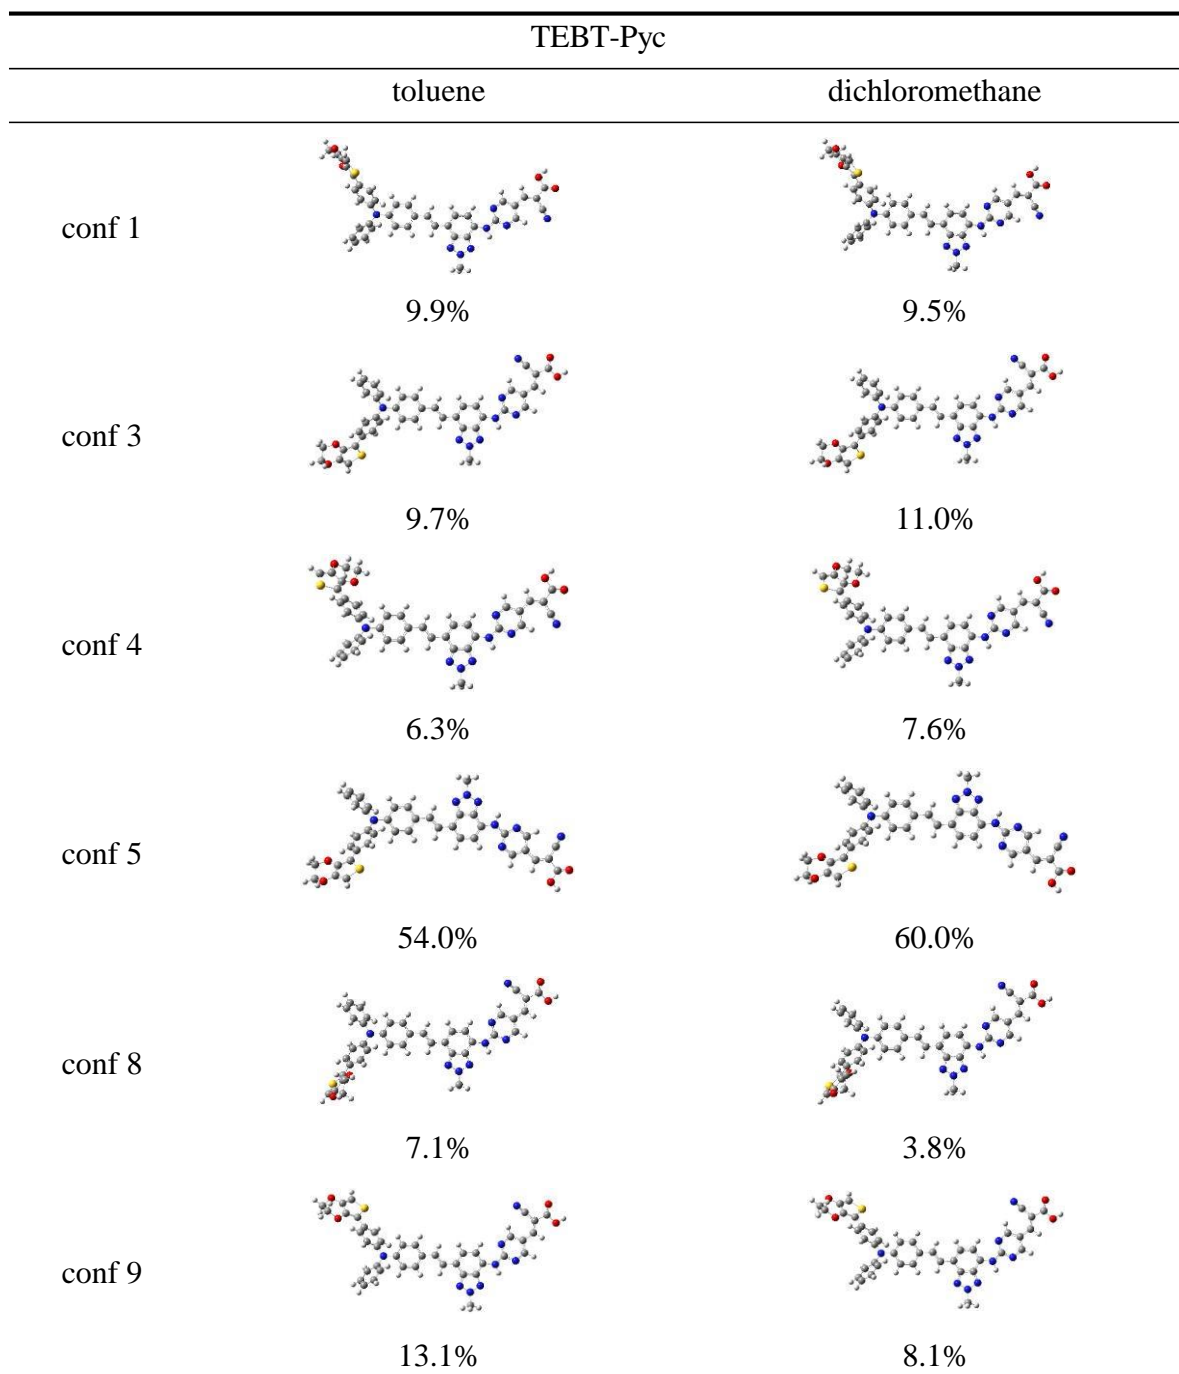

Fig S8. The B3LYP/6-311G(d,p) optimized geometries of shortlisted conformations obtained from simulated annealing process of TEBT-Pyc in toluene and dichloromethane.

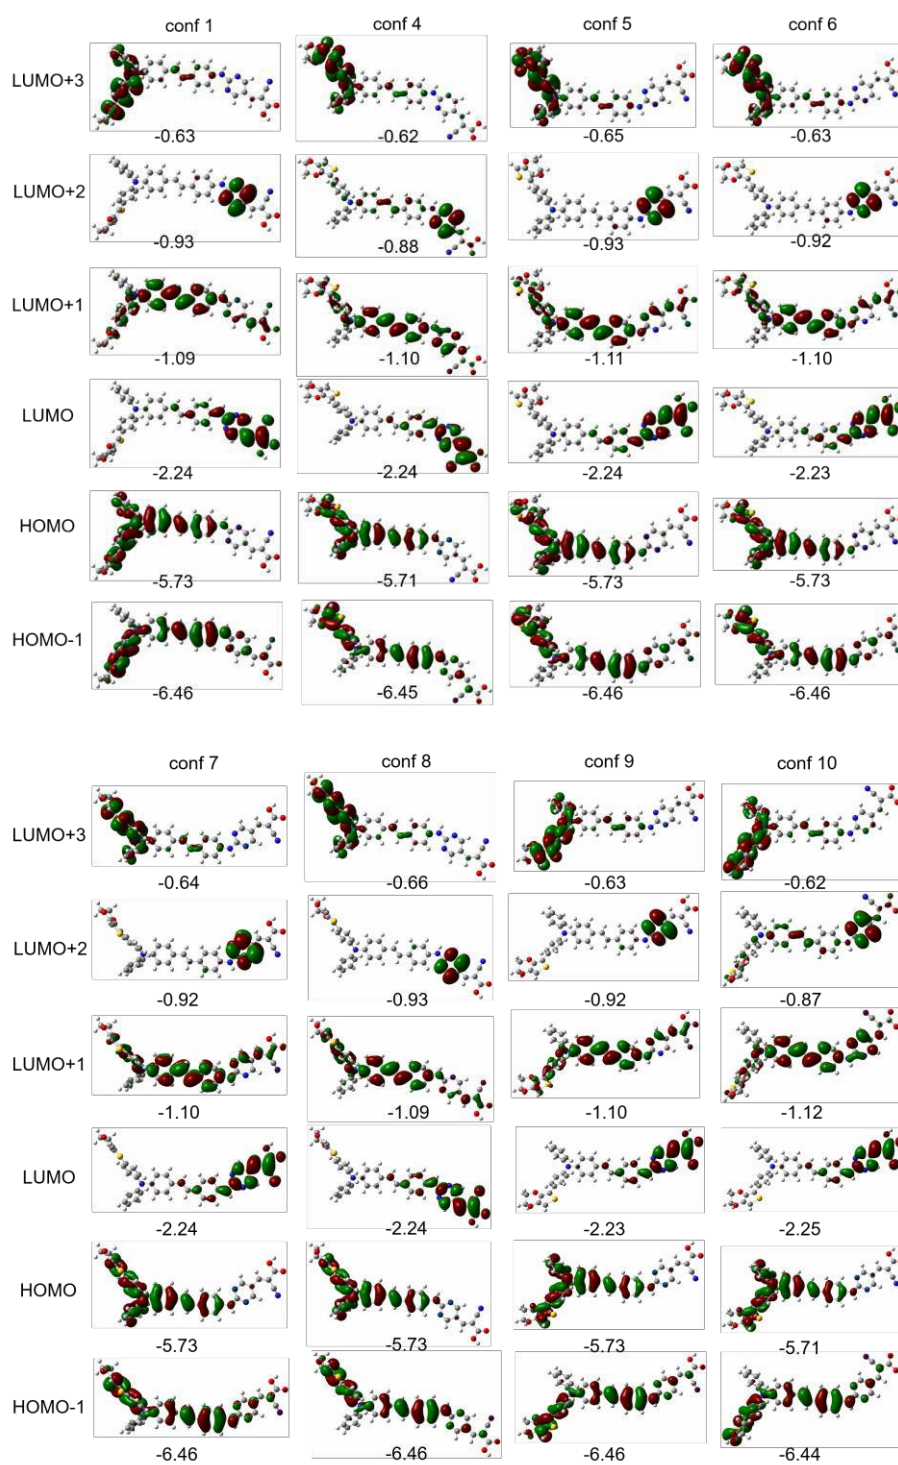

Fig S9. The isosurfaces (isovalue= $\pm 0.02$  a.u.) and corresponding energy levels (in eV) of HOMO-1 to LUMO+3 of low-lying conformations of TE-Pyc in toluene using MN15.

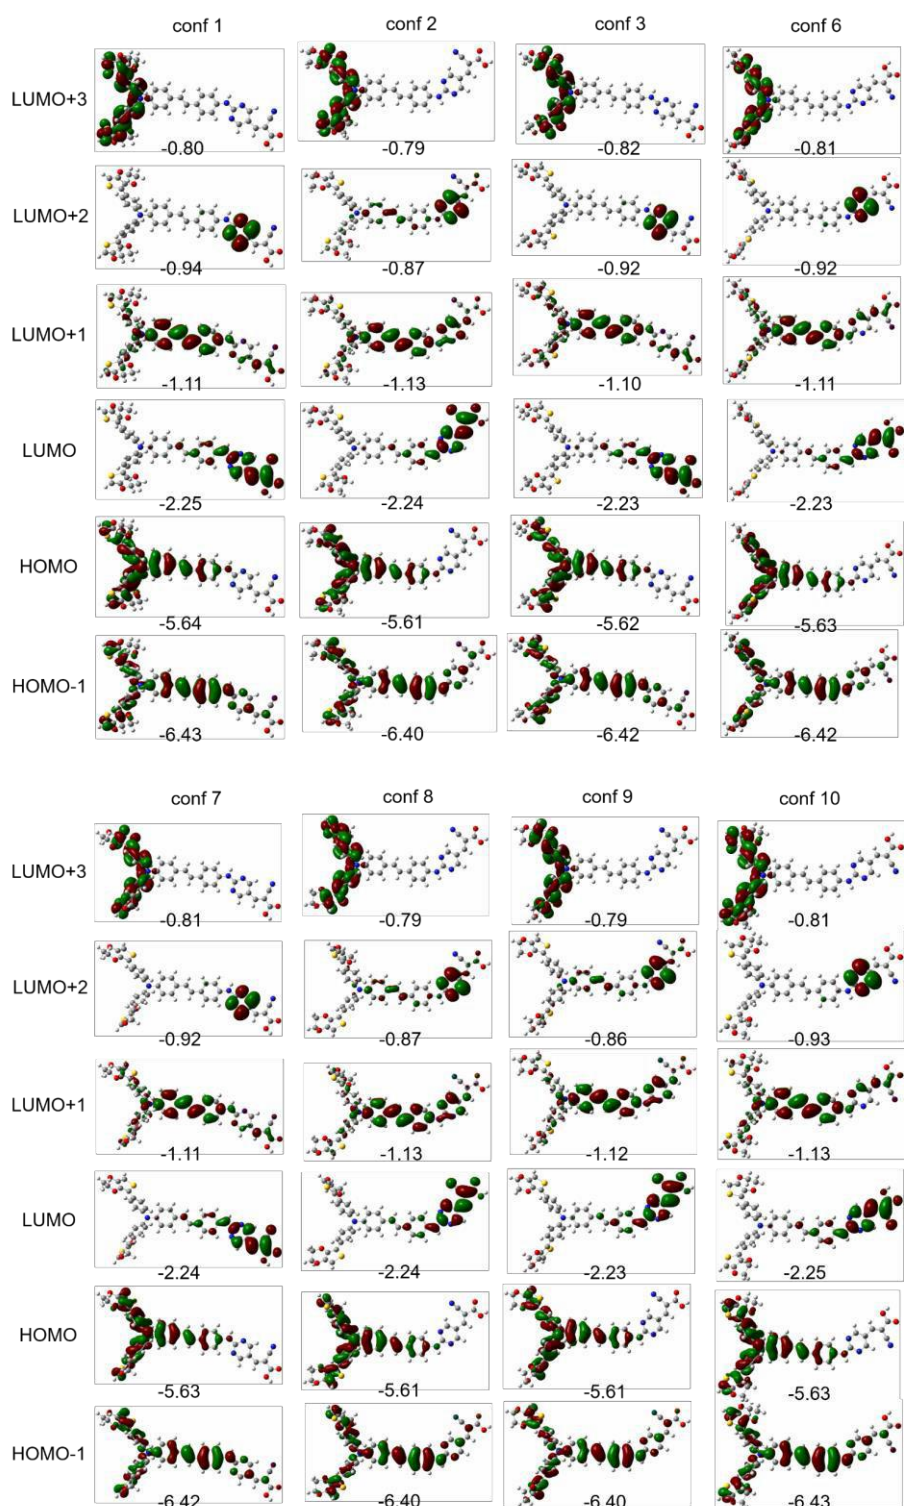

Fig S10. The isosurfaces (isovalue= $\pm 0.02$  a.u.) and corresponding energy levels (in eV) of HOMO-1 to LUMO+3 of low-lying conformations of ETE-Pyc in toluene using MN15.

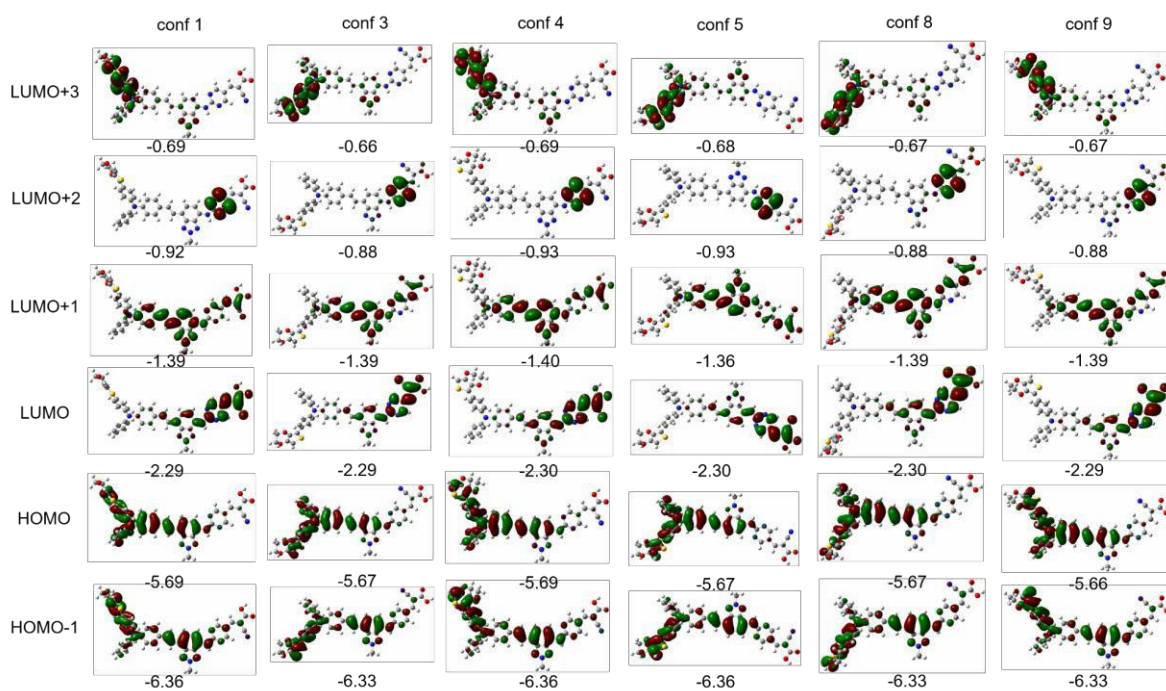

Fig S11. The isosurfaces (isovalue= $\pm 0.02$  a.u.) and corresponding energy levels (in eV) of HOMO-1 to LUMO+3 of low-lying conformers of TEBT-Pyc in toluene using MN15.

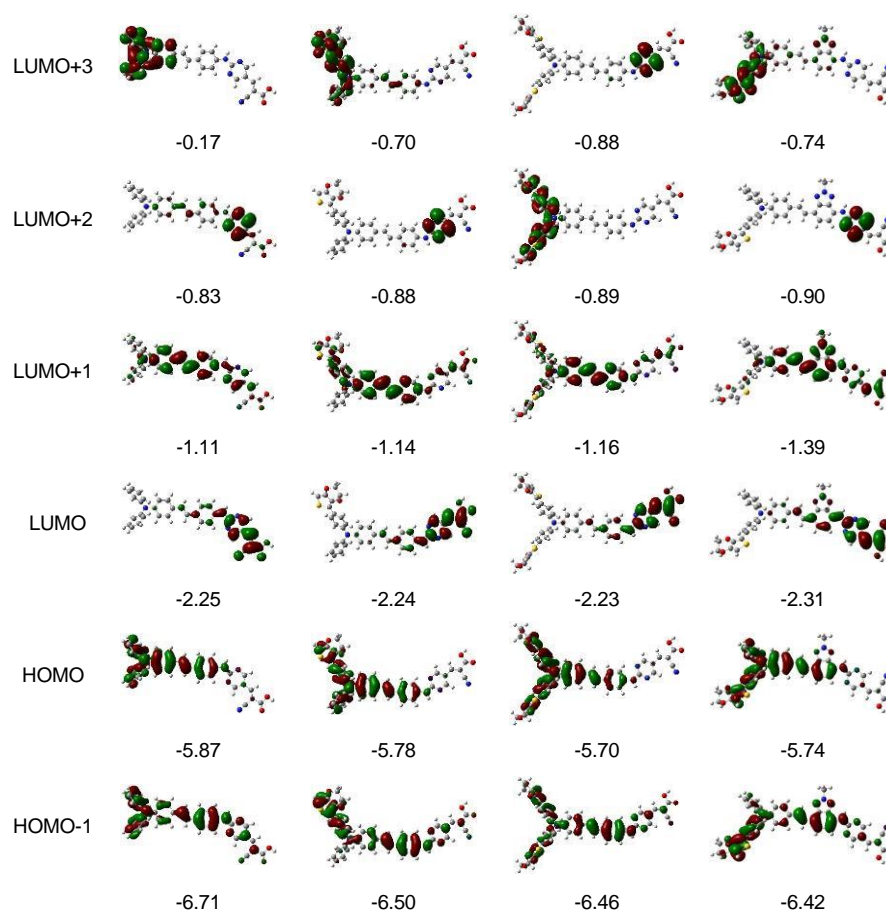

Fig S12. The isosurfaces (isovalue= $\pm 0.02$  a.u.) and corresponding energy levels (in eV) of HOMO-1 to LUMO+3 for TPA-Pyc (conf 1), TE-Pyc (conf 5), ETE-Pyc (conf 6), and TEBT-Pyc (conf 5) in dichloromethane using MN15.

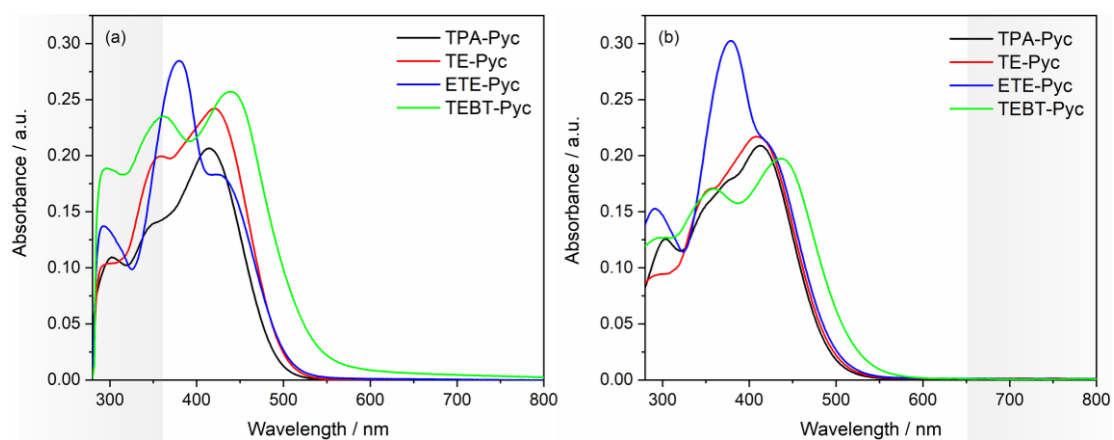

Fig S13. The experimental UV-Vis spectra of the four dyes in toluene (a, data taken from Ref[S1]) and dichloromethane (b). Concentration:  $5 \times 10^{-6}$  mol/L.

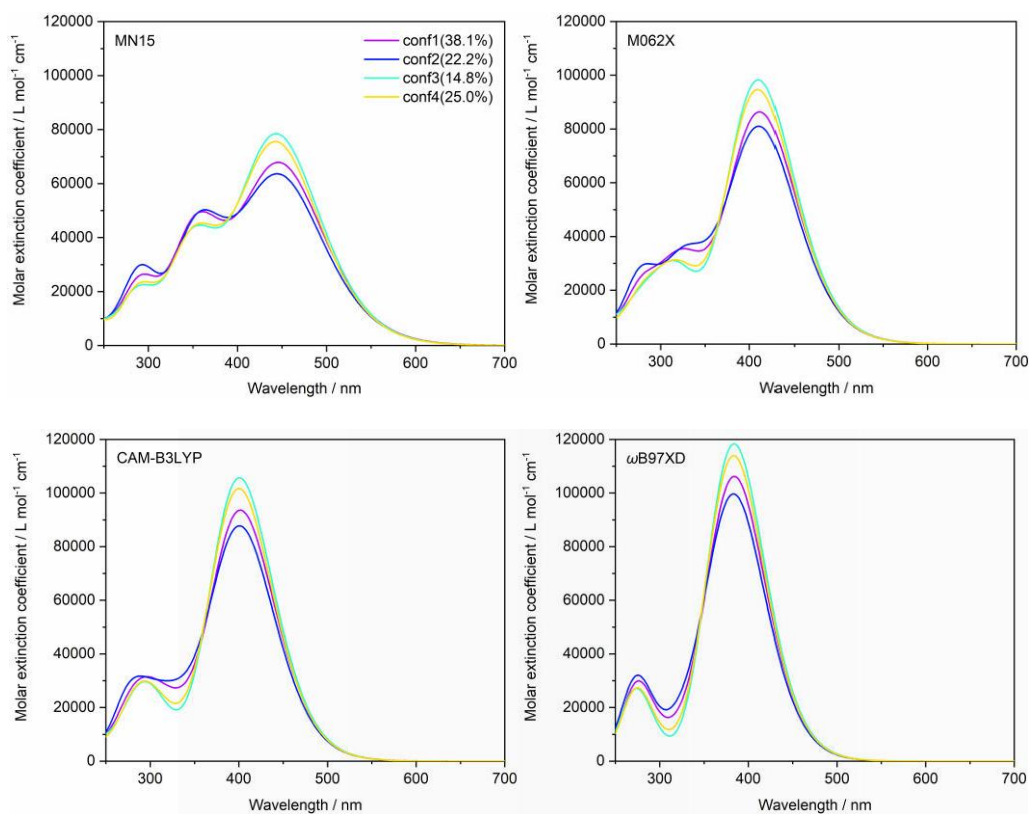

Fig S14. The UV-Vis spectra of various conformations of TPA-Pyc in toluene using MN15, M062X, CAM-B3LYP, and  $\omega$ B97XD.

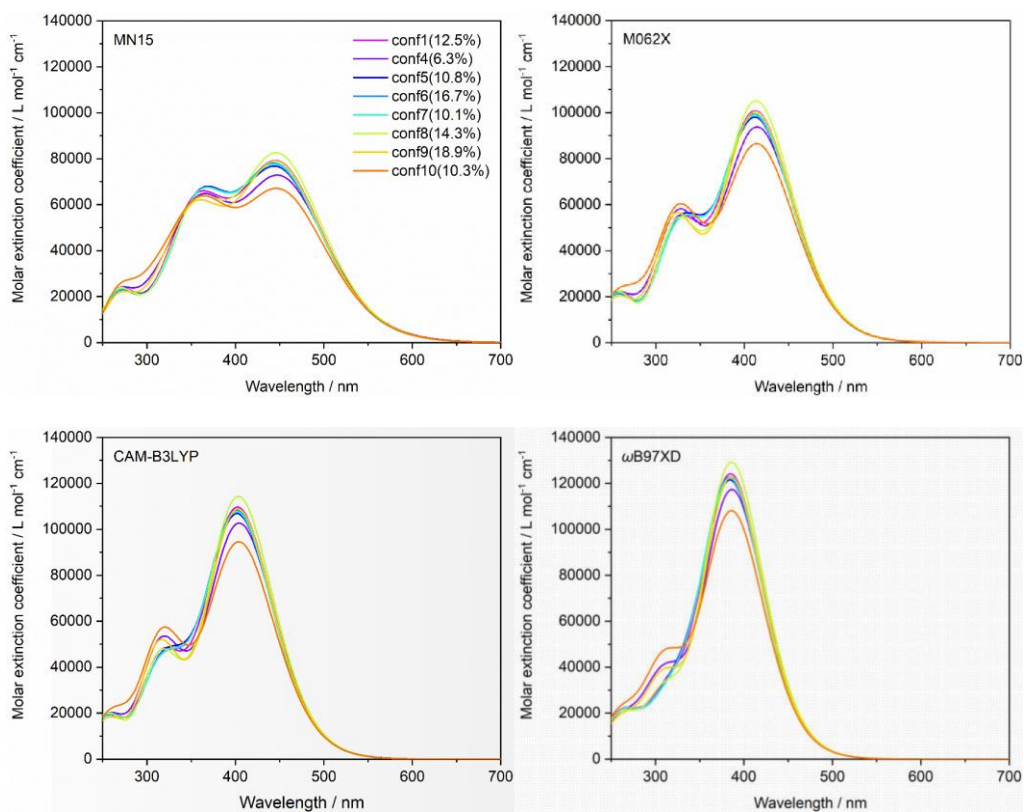

Fig S15. The UV-Vis spectra of various conformations of TE-Pyc in toluene using MN15, M062X, CAM-B3LYP, and  $\omega$ B97XD.

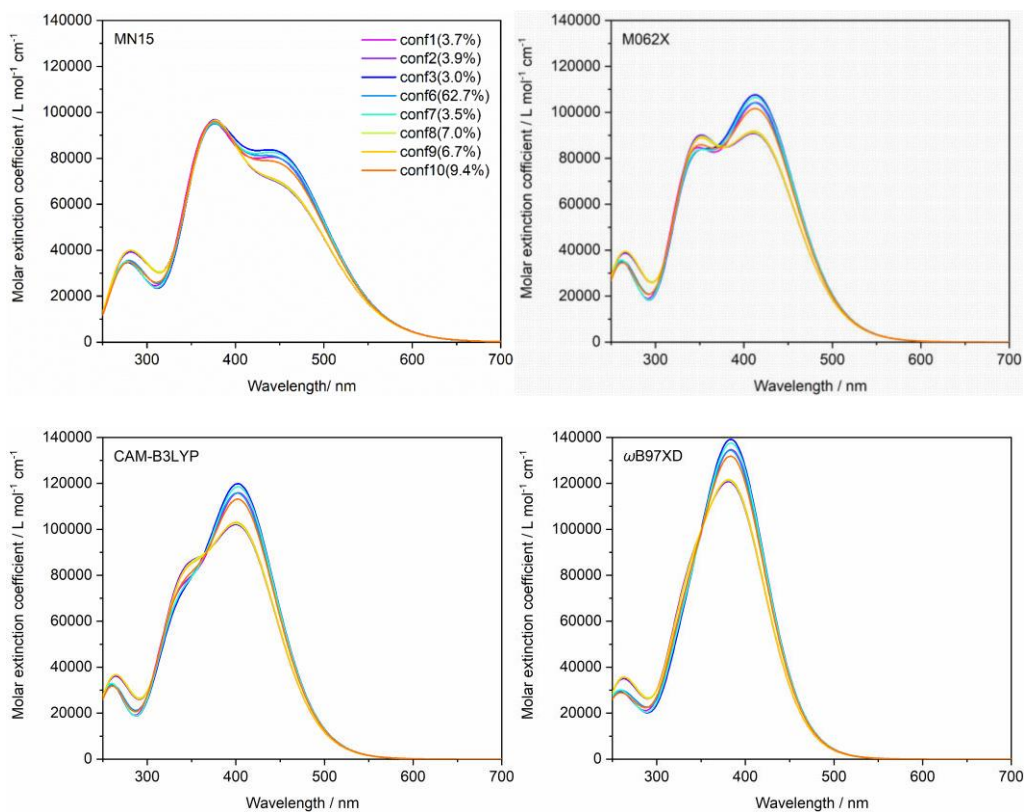

Fig S16. The UV-Vis spectra of various conformations of ETE-Pyc in toluene using MN15, M062X, CAM-B3LYP, and  $\omega$ B97XD.

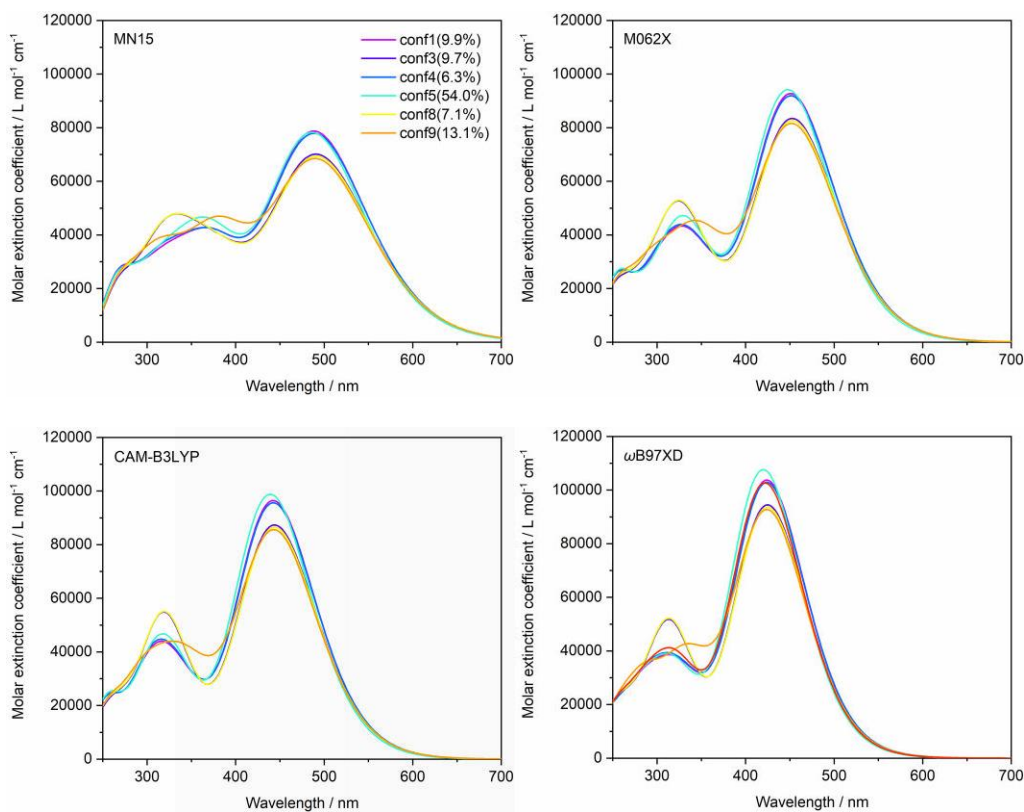

Fig S17. The UV-Vis spectra of various conformations of TEBT-Pyc in toluene using MN15, M062X, CAM-B3LYP, and  $\omega$ B97XD.



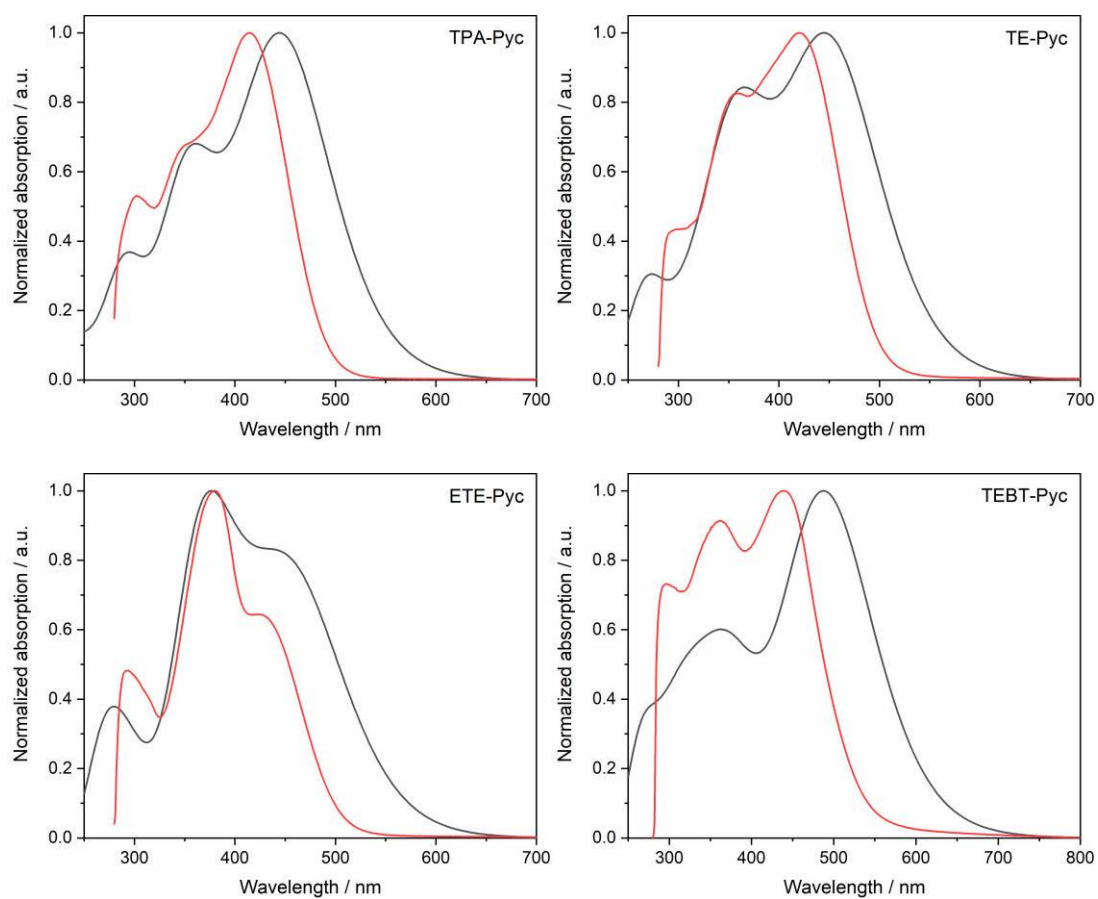

Fig S18. The one-to-one normalized experimental and MN15 computational conformation-weighted absorption spectra of TPA-Pyc, TE-Pyc, ETE-Pyc, and TEBT-Pyc.

Table S1. Gibbs free energies ( $G$ ) and populations of various conformations of TPA-Pyc in toluene and dichloromethane.

|     |       | $G^a$ /a.u.  | $G_{\text{rel}}^b$ /kJ mol <sup>-1</sup> | Pop. <sup>c</sup> |
|-----|-------|--------------|------------------------------------------|-------------------|
| Tol | conf1 | -1734.872515 | 0.000                                    | 38.1%             |
|     | conf2 | -1734.872004 | 1.342                                    | 22.2%             |
|     | conf3 | -1734.871621 | 2.347                                    | 14.8%             |
|     | conf4 | -1734.872117 | 1.045                                    | 25.0%             |
| DCM | conf1 | -1734.882126 | 0.000                                    | 39.5%             |
|     | conf2 | -1734.881682 | 1.166                                    | 24.7%             |
|     | conf3 | -1734.880986 | 2.993                                    | 11.8%             |
|     | conf4 | -1734.881651 | 1.247                                    | 23.9%             |

<sup>a</sup> The Gibbs free energy is calculated at B3LYP/6-311G(d,p) level; <sup>b</sup>  $G_{\text{rel}}$  is given relative to the lowest value of the corresponding configuration; <sup>c</sup> Population is calculated by

$$\text{Pop} = e^{-\frac{G_{\text{rel}}(i)}{RT}} / \sum_j e^{-\frac{G_{\text{rel}}(j)}{RT}}, \text{ where } R=8.314 \text{ J mol}^{-1} \text{ K}^{-1} \text{ and } T=298.15 \text{ K. Both here and after.}$$

Table S2. Gibbs free energies ( $G$ ) and populations of various conformations of TE-Pyc in toluene and dichloromethane.

|        |        | $G$ /a.u.    | $G_{\text{rel}}$ /kJ mol <sup>-1</sup> | Pop.  |      |
|--------|--------|--------------|----------------------------------------|-------|------|
| Tol    | conf1  | -2514.562002 | 1.027                                  | 12.5% |      |
|        | conf4  | -2514.561356 | 2.723                                  | 6.3%  |      |
|        | conf5  | -2514.561862 | 1.394                                  | 10.8% |      |
|        | conf6  | -2514.562276 | 0.307                                  | 16.7% |      |
|        | conf7  | -2514.561801 | 1.554                                  | 10.1% |      |
|        | conf8  | -2514.562127 | 0.698                                  | 14.3% |      |
|        | conf9  | -2514.562393 | 0.000                                  | 18.9% |      |
|        | conf10 | -2514.561816 | 1.515                                  | 10.3% |      |
|        | DCM    | conf1        | -2514.573257                           | 4.818 | 7.1% |
|        |        | conf4        | -2514.572493                           | 6.824 | 3.1% |
| conf5  |        | -2514.575092 | 0.000                                  | 49.3% |      |
| conf6  |        | -2514.573545 | 4.062                                  | 9.6%  |      |
| conf7  |        | -2514.573017 | 5.448                                  | 5.5%  |      |
| conf8  |        | -2514.573727 | 3.584                                  | 11.6% |      |
| conf9  |        | -2514.573427 | 4.371                                  | 8.5%  |      |
| conf10 |        | -2514.572991 | 5.516                                  | 5.3%  |      |

Table S3. Gibbs free energies ( $G$ ) and populations of various conformations of ETE-Pyc in toluene and dichloromethane.

|        |        | $G/a.u.$     | $G_{rel}/kJ\ mol^{-1}$ | Pop.  |      |
|--------|--------|--------------|------------------------|-------|------|
| Tol    | conf1  | -3294.251896 | 6.989                  | 3.7%  |      |
|        | conf2  | -3294.251946 | 6.858                  | 3.9%  |      |
|        | conf3  | -3294.251694 | 7.519                  | 3.0%  |      |
|        | conf6  | -3294.254558 | 0.000                  | 62.7% |      |
|        | conf7  | -3294.251846 | 7.120                  | 3.5%  |      |
|        | conf8  | -3294.252495 | 5.416                  | 7.0%  |      |
|        | conf9  | -3294.252446 | 5.545                  | 6.7%  |      |
|        | conf10 | -3294.252762 | 4.715                  | 9.4%  |      |
|        | DCM    | conf1        | -3294.265014           | 7.898 | 2.8% |
|        |        | conf2        | -3294.265512           | 6.590 | 4.8% |
| conf3  |        | -3294.265325 | 7.081                  | 3.9%  |      |
| conf6  |        | -3294.268022 | 0.000                  | 67.8% |      |
| conf7  |        | -3294.265085 | 7.711                  | 3.0%  |      |
| conf8  |        | -3294.265630 | 6.280                  | 5.4%  |      |
| conf9  |        | -3294.264778 | 8.517                  | 2.2%  |      |
| conf10 |        | -3294.266230 | 4.705                  | 10.2% |      |

Table S4. Gibbs free energies ( $G$ ) and populations of various conformations of TEBT-Pyc in toluene and dichloromethane.

|       |       | $G/a.u.$     | $G_{rel}/kJ\ mol^{-1}$ | Pop.     |
|-------|-------|--------------|------------------------|----------|
| Tol   | conf1 | -2717.519272 | 4.206051               | 9.9%     |
|       | conf3 | -2717.519250 | 4.263812               | 9.7%     |
|       | conf4 | -2717.518842 | 5.335016               | 6.3%     |
|       | conf5 | -2717.520874 | 0.000000               | 54.0%    |
|       | conf8 | -2717.518954 | 5.040960               | 7.1%     |
|       | conf9 | -2717.519533 | 3.520795               | 13.1%    |
|       | DCM   | conf1        | -2717.531443           | 4.570996 |
| conf3 |       | -2717.531581 | 4.208676               | 11.0%    |
| conf4 |       | -2717.531233 | 5.122350               | 7.6%     |
| conf5 |       | -2717.533184 | 0.000000               | 60.0%    |
| conf8 |       | -2717.530588 | 6.815798               | 3.8%     |
| conf9 |       | -2717.531298 | 4.951693               | 8.1%     |

Table S5. The selected dihedrals (in degree) of various conformations of TPA-Pyc in toluene and dichloromethane obtained from B3LYP/6-311G(d,p) calculations.<sup>a</sup>

|       |          | toluene | dichloromethane |
|-------|----------|---------|-----------------|
| conf1 | $\beta$  | 3.2     | 2.7             |
|       | $\gamma$ | 0.8     | 0.4             |
|       | $\delta$ | 0.0     | 0.3             |
|       | $\theta$ | 0.1     | 0.1             |
| conf2 | $\beta$  | 0.5     | 0.7             |
|       | $\gamma$ | 1.1     | 0.7             |
|       | $\delta$ | 0.2     | 0.6             |
|       | $\theta$ | 0.2     | 0.3             |
| conf3 | $\beta$  | 2.0     | 1.4             |
|       | $\gamma$ | 0.4     | 0.8             |
|       | $\delta$ | 0.7     | 0.9             |
|       | $\theta$ | 0.2     | 0.2             |
| conf4 | $\beta$  | 2.6     | 2.4             |
|       | $\gamma$ | 1.5     | 1.4             |
|       | $\delta$ | 0.4     | 0.5             |
|       | $\theta$ | 0.2     | 0.3             |

<sup>a</sup> The values of the dihedrals were transformed into 0-90° for clarity. Both here and after.

Table S6. The selected dihedrals (in degree) of various conformations of TE-Pyc in toluene and dichloromethane obtained from B3LYP/6-311G(d,p) calculations.

|        |            | toluene | dichloromethane |
|--------|------------|---------|-----------------|
| conf1  | $\alpha_1$ | 21.7    | 21.8            |
|        | $\beta$    | 2.2     | 2.4             |
|        | $\gamma$   | 0.7     | 1.4             |
|        | $\delta$   | 0.2     | 0.2             |
|        | $\theta$   | 0.5     | 0.4             |
| conf4  | $\alpha_1$ | 21.9    | 21.9            |
|        | $\beta$    | 2.2     | 1.8             |
|        | $\gamma$   | 0.0     | 0.3             |
|        | $\delta$   | 0.4     | 1.1             |
|        | $\theta$   | 0.0     | 0.1             |
| conf5  | $\alpha_1$ | 18.9    | 20.0            |
|        | $\beta$    | 2.6     | 2.6             |
|        | $\gamma$   | 1.2     | 1.4             |
|        | $\delta$   | 0.2     | 0.6             |
|        | $\theta$   | 0.2     | 0.4             |
| conf6  | $\alpha_1$ | 21.9    | 22.1            |
|        | $\beta$    | 4.2     | 4.2             |
|        | $\gamma$   | 3.3     | 3.3             |
|        | $\delta$   | 0.6     | 0.4             |
|        | $\theta$   | 0.3     | 0.6             |
| conf7  | $\alpha_1$ | 20.9    | 21.1            |
|        | $\beta$    | 3.4     | 3.4             |
|        | $\gamma$   | 2.0     | 2.0             |
|        | $\delta$   | 0.5     | 0.1             |
|        | $\theta$   | 0.1     | 0.4             |
| conf8  | $\alpha_1$ | 15.9    | 16.4            |
|        | $\beta$    | 3.4     | 1.7             |
|        | $\gamma$   | 1.6     | 1.5             |
|        | $\delta$   | 0.8     | 0.5             |
|        | $\theta$   | 0.3     | 0.2             |
| conf9  | $\alpha_1$ | 22.1    | 22.3            |
|        | $\beta$    | 5.7     | 4.1             |
|        | $\gamma$   | 4.1     | 2.6             |
|        | $\delta$   | 0.0     | 0.8             |
|        | $\theta$   | 0.4     | 0.9             |
| conf10 | $\alpha_1$ | 21.0    | 21.3            |
|        | $\beta$    | 1.5     | 1.3             |
|        | $\gamma$   | 0.3     | 0.5             |
|        | $\delta$   | 0.8     | 1.0             |
|        | $\theta$   | 0.4     | 0.5             |

Table S7. The selected dihedrals (in degree) of various conformations of ETE-Pyc in toluene and dichloromethane obtained from B3LYP/6-311G(d,p) calculations.

|       |            | toluene | dichloromethane |
|-------|------------|---------|-----------------|
| conf1 | $\alpha_1$ | 21.9    | 22.3            |
|       | $\alpha_2$ | 21.8    | 22.1            |
|       | $\beta$    | 1.9     | 2.1             |
|       | $\gamma$   | 0.4     | 0.8             |
|       | $\delta$   | 1.7     | 2.0             |
|       | $\theta$   | 0.9     | 1.1             |
| conf2 | $\alpha_1$ | 21.9    | 22.2            |
|       | $\alpha_2$ | 18.3    | 18.9            |
|       | $\beta$    | 0.2     | 0.6             |
|       | $\gamma$   | 1.7     | 1.2             |
|       | $\delta$   | 0.9     | 1.1             |
|       | $\theta$   | 0.1     | 0.0             |
| conf3 | $\alpha_1$ | 18.6    | 19.2            |
|       | $\alpha_2$ | 18.0    | 19.1            |
|       | $\beta$    | 3.7     | 3.6             |
|       | $\gamma$   | 2.3     | 2.3             |
|       | $\delta$   | 0.1     | 0.3             |
|       | $\theta$   | 0.2     | 0.1             |
| conf6 | $\alpha_1$ | 15.2    | 15.2            |
|       | $\alpha_2$ | 21.3    | 20.8            |
|       | $\beta$    | 1.5     | 3.2             |
|       | $\gamma$   | 0.6     | 2.6             |
|       | $\delta$   | 0.4     | 1.1             |
|       | $\theta$   | 0.0     | 0.1             |
| conf7 | $\alpha_1$ | 18.8    | 19.2            |
|       | $\alpha_2$ | 20.4    | 20.3            |
|       | $\beta$    | 2.3     | 2.2             |
|       | $\gamma$   | 0.6     | 0.6             |
|       | $\delta$   | 1.8     | 1.8             |
|       | $\theta$   | 0.7     | 0.8             |
| conf8 | $\alpha_1$ | 15.1    | 15.9            |
|       | $\alpha_2$ | 22.8    | 23.0            |
|       | $\beta$    | 2.8     | 1.4             |
|       | $\gamma$   | 1.6     | 0.2             |

|        |            |      |      |
|--------|------------|------|------|
|        | $\delta$   | 0.9  | 0.5  |
|        | $\theta$   | 0.3  | 0.6  |
| conf9  | $\alpha_1$ | 21.5 | 22.1 |
|        | $\alpha_2$ | 16.8 | 17.7 |
|        | $\beta$    | 4.1  | 4.3  |
|        | $\gamma$   | 3.2  | 3.4  |
|        | $\delta$   | 1.6  | 2.3  |
|        | $\theta$   | 0.0  | 0.1  |
| conf10 | $\alpha_1$ | 21.7 | 21.8 |
|        | $\alpha_2$ | 18.7 | 19.1 |
|        | $\beta$    | 2.3  | 2.1  |
|        | $\gamma$   | 0.6  | 0.3  |
|        | $\delta$   | 0.1  | 0.3  |
|        | $\theta$   | 0.0  | 0.0  |

Table S8. The selected dihedrals (in degree) of various conformations of TEBT-Pyc in toluene and dichloromethane obtained from B3LYP/6-311G(d,p) calculations.

|       |            | toluene | dichloromethane |
|-------|------------|---------|-----------------|
| conf1 | $\alpha_1$ | 21.8    | 22.1            |
|       | $\beta$    | 1.9     | 1.3             |
|       | $\gamma$   | 0.2     | 0.6             |
|       | $\delta$   | 0.1     | 0.5             |
|       | $\theta$   | 0.2     | 0.3             |
| conf3 | $\alpha_1$ | 22.2    | 22.5            |
|       | $\beta$    | 1.4     | 2.2             |
|       | $\gamma$   | 0.3     | 1.4             |
|       | $\delta$   | 0.0     | 0.2             |
|       | $\theta$   | 0.2     | 0.8             |
| conf4 | $\alpha_1$ | 22.0    | 22.1            |
|       | $\beta$    | 1.4     | 1.6             |
|       | $\gamma$   | 0.0     | 0.7             |
|       | $\delta$   | 0.2     | 0.3             |
|       | $\theta$   | 0.5     | 0.6             |
| conf5 | $\alpha_1$ | 21.5    | 22.1            |
|       | $\beta$    | 1.5     | 2.4             |
|       | $\gamma$   | 0.0     | 0.5             |
|       | $\delta$   | 0.3     | 0.3             |
|       | $\theta$   | 0.5     | 0.3             |
| conf8 | $\alpha_1$ | 21.0    | 20.9            |
|       | $\beta$    | 2.7     | 2.9             |
|       | $\gamma$   | 2.3     | 2.5             |
|       | $\delta$   | 0.1     | 0.2             |
|       | $\theta$   | 0.5     | 0.8             |
| conf9 | $\alpha_1$ | 19.5    | 22.3            |
|       | $\beta$    | 1.6     | 4.1             |
|       | $\gamma$   | 0.2     | 2.6             |
|       | $\delta$   | 0.2     | 0.8             |
|       | $\theta$   | 0.2     | 0.9             |



Table S9. The first vertical excitation energy ( $E_{\text{vert}}$ , in eV) and oscillator strength ( $f$ ) of various conformations of TPA-Pyc in toluene using different functionals.

| Functional     |                   | conf1 | conf2 | conf3 | conf4 |
|----------------|-------------------|-------|-------|-------|-------|
| B3LYP          | $E_{\text{vert}}$ | 2.00  | 2.00  | 2.04  | 2.04  |
|                | $f$               | 0.58  | 0.54  | 0.68  | 0.65  |
| PBE0           | $E_{\text{vert}}$ | 2.22  | 2.22  | 2.25  | 2.25  |
|                | $f$               | 0.74  | 0.68  | 0.87  | 0.83  |
| MN15           | $E_{\text{vert}}$ | 2.76  | 2.76  | 2.78  | 2.79  |
|                | $f$               | 1.57  | 1.46  | 1.83  | 1.76  |
| M062X          | $E_{\text{vert}}$ | 3.00  | 3.01  | 3.02  | 3.02  |
|                | $f$               | 2.02  | 1.88  | 2.32  | 2.23  |
| CAM-B3LYP      | $E_{\text{vert}}$ | 3.08  | 3.08  | 3.09  | 3.09  |
|                | $f$               | 2.19  | 2.04  | 2.50  | 2.40  |
| $\omega$ B97XD | $E_{\text{vert}}$ | 3.22  | 3.22  | 3.23  | 3.23  |
|                | $f$               | 2.48  | 2.30  | 2.80  | 2.69  |

Table S10. The first vertical excitation energy ( $E_{\text{vert}}$ , in eV) and oscillator strength ( $f$ ) of various conformations of TE-Pyc in toluene using different functionals.

| Functional     |                   | conf1 | conf4 | conf5 | conf6 | conf7 | conf8 | conf9 | conf10 |
|----------------|-------------------|-------|-------|-------|-------|-------|-------|-------|--------|
| B3LYP          | $E_{\text{vert}}$ | 1.94  | 1.91  | 1.93  | 1.94  | 1.94  | 1.94  | 1.94  | 1.90   |
|                | $f$               | 0.55  | 0.50  | 0.52  | 0.53  | 0.53  | 0.57  | 0.54  | 0.45   |
| PBE0           | $E_{\text{vert}}$ | 2.17  | 2.14  | 2.16  | 2.17  | 2.17  | 2.17  | 2.17  | 2.13   |
|                | $f$               | 0.72  | 0.65  | 0.68  | 0.70  | 0.69  | 0.74  | 0.71  | 0.59   |
| MN15           | $E_{\text{vert}}$ | 2.75  | 2.73  | 2.74  | 2.75  | 2.75  | 2.75  | 2.75  | 2.72   |
|                | $f$               | 1.78  | 1.63  | 1.70  | 1.74  | 1.73  | 1.87  | 1.78  | 1.48   |
| M062X          | $E_{\text{vert}}$ | 2.99  | 2.98  | 2.99  | 3.00  | 2.99  | 2.99  | 3.00  | 2.98   |
|                | $f$               | 2.34  | 2.18  | 2.26  | 2.29  | 2.28  | 2.46  | 2.35  | 2.00   |
| CAM-B3LYP      | $E_{\text{vert}}$ | 3.07  | 3.06  | 3.07  | 3.07  | 3.07  | 3.07  | 3.07  | 3.05   |
|                | $f$               | 2.55  | 2.39  | 2.46  | 2.49  | 2.48  | 2.69  | 2.56  | 2.19   |
| $\omega$ B97XD | $E_{\text{vert}}$ | 3.21  | 3.20  | 3.21  | 3.21  | 3.21  | 3.21  | 3.21  | 3.20   |
|                | $f$               | 2.87  | 2.74  | 2.77  | 2.81  | 2.80  | 3.04  | 2.89  | 2.50   |

Table S11. The first vertical excitation energy ( $E_{\text{vert}}$ , in eV) and oscillator strength ( $f$ ) of various conformations of ETE-Pyc in toluene using different functionals.

| Functional     |                   | conf1 | conf2 | conf3 | conf6 | conf7 | conf8 | conf9 | conf10 |
|----------------|-------------------|-------|-------|-------|-------|-------|-------|-------|--------|
| B3LYP          | $E_{\text{vert}}$ | 1.85  | 1.82  | 1.85  | 1.86  | 1.85  | 1.82  | 1.83  | 1.84   |
|                | $f$               | 0.47  | 0.38  | 0.48  | 0.47  | 0.48  | 0.39  | 0.39  | 0.45   |
| PBE0           | $E_{\text{vert}}$ | 2.08  | 2.05  | 2.09  | 2.09  | 2.09  | 2.06  | 2.06  | 2.08   |
|                | $f$               | 0.61  | 0.50  | 0.63  | 0.61  | 0.62  | 0.50  | 0.51  | 0.59   |
| MN15           | $E_{\text{vert}}$ | 2.70  | 2.69  | 2.71  | 2.71  | 2.71  | 2.69  | 2.69  | 2.70   |
|                | $f$               | 1.71  | 1.40  | 1.76  | 1.69  | 1.75  | 1.40  | 1.42  | 1.64   |
| M062X          | $E_{\text{vert}}$ | 2.96  | 2.95  | 2.96  | 2.97  | 2.97  | 2.95  | 2.95  | 2.96   |
|                | $f$               | 2.36  | 1.98  | 2.42  | 2.33  | 2.40  | 1.98  | 2.00  | 2.28   |
| CAM-B3LYP      | $E_{\text{vert}}$ | 3.04  | 3.03  | 3.04  | 3.04  | 3.04  | 3.03  | 3.03  | 3.04   |
|                | $f$               | 2.60  | 2.20  | 2.67  | 2.57  | 2.65  | 2.21  | 2.23  | 2.52   |
| $\omega$ B97XD | $E_{\text{vert}}$ | 3.19  | 3.18  | 3.19  | 3.19  | 3.19  | 3.18  | 3.18  | 3.04   |
|                | $f$               | 2.97  | 2.54  | 3.05  | 2.93  | 3.02  | 2.54  | 2.57  | 2.52   |

Table S12. The first vertical excitation energy ( $E_{\text{vert}}$ , in eV) and oscillator strength ( $f$ ) of various conformations of TEBT-Pyc in toluene using different functionals.

| Functional     |                   | conf1 | conf3 | conf4 | conf5 | conf8 | conf9 |
|----------------|-------------------|-------|-------|-------|-------|-------|-------|
| B3LYP          | $E_{\text{vert}}$ | 1.86  | 1.83  | 1.86  | 1.84  | 1.83  | 1.82  |
|                | $f$               | 0.78  | 0.67  | 0.76  | 0.74  | 0.66  | 0.64  |
| PBE0           | $E_{\text{vert}}$ | 2.06  | 2.03  | 2.05  | 2.05  | 2.03  | 2.03  |
|                | $f$               | 0.99  | 0.85  | 0.97  | 0.95  | 0.84  | 0.82  |
| MN15           | $E_{\text{vert}}$ | 2.53  | 2.51  | 2.53  | 2.54  | 2.51  | 2.51  |
|                | $f$               | 1.84  | 1.63  | 1.82  | 1.83  | 1.61  | 1.58  |
| M062X          | $E_{\text{vert}}$ | 2.74  | 2.73  | 2.74  | 2.76  | 2.73  | 2.73  |
|                | $f$               | 2.19  | 1.96  | 2.17  | 2.22  | 1.95  | 1.90  |
| CAM-B3LYP      | $E_{\text{vert}}$ | 2.80  | 2.79  | 2.80  | 2.82  | 2.79  | 2.79  |
|                | $f$               | 2.27  | 2.06  | 2.26  | 2.33  | 2.04  | 2.00  |
| $\omega$ B97XD | $E_{\text{vert}}$ | 2.92  | 2.91  | 2.92  | 2.95  | 2.91  | 2.91  |
|                | $f$               | 2.45  | 2.23  | 2.43  | 2.54  | 2.21  | 2.17  |

Table S13. Electronic excitation properties of various conformations of TPA-Pyc in toluene using MN15.

TPA-Pyc (conf1)

| Excited state   | $E_{\text{vert}}/\text{eV}$ | $\lambda_{\text{cal}}/\text{nm}$ | $f$  | assignment                                                                                            |
|-----------------|-----------------------------|----------------------------------|------|-------------------------------------------------------------------------------------------------------|
| S <sub>1</sub>  | 2.76                        | 449                              | 1.57 | H→L 74.0%, H-1→L 13.1%, H→L+1 8.0%                                                                    |
| S <sub>2</sub>  | 3.44                        | 360                              | 0.64 | H→L+1 77.2%, H→L 6.6%, H→L+2 5.8%                                                                     |
| S <sub>3</sub>  | 3.51                        | 353                              | 0.47 | H-1→L 63.6%, H→L 18.6%, H-2→L 12.5%                                                                   |
| S <sub>4</sub>  | 3.95                        | 314                              | 0.04 | H→L+2 56.9%, H-1→L+2 18.4%, H-1→L+1 10.4%                                                             |
| S <sub>5</sub>  | 4.04                        | 307                              | 0.04 | H→L+3 82.0%, H-1→L+3 6.9%                                                                             |
| S <sub>6</sub>  | 4.07                        | 305                              | 0.00 | H-9→L 83.9%, H-9→L+2 7.0%                                                                             |
| S <sub>7</sub>  | 4.19                        | 296                              | 0.28 | H→L+4 84.0%, H-1→L+4 12.4%                                                                            |
| S <sub>8</sub>  | 4.26                        | 291                              | 0.16 | H-2→L 57.0%, H-8→L 10.6%, H-1→L+1 10.4%,<br>H-1→L 9.8%                                                |
| S <sub>9</sub>  | 4.36                        | 284                              | 0.06 | H-1→L+1 48.5%, H→L+5 13.0%, H-1→L 8.1%,<br>H-2→L 8.0%, H-1→L+2 6.8%                                   |
| S <sub>10</sub> | 4.46                        | 278                              | 0.00 | H-9→L+2 67.2%, H-9→L+1 17.5%, H-9→L 9.0%                                                              |
| S <sub>11</sub> | 4.51                        | 275                              | 0.05 | H→L+5 21.8%, H-5→L 18.5%, H→L+6 14.3%,<br>H-1→L+5 11.4%, H-1→L+1 10.9%, H-5→L+1 6.9%,<br>H-1→L+6 5.0% |
| S <sub>12</sub> | 4.60                        | 270                              | 0.03 | H→L+7 41.7%, H→L+8 24.0%, H-1→L+3 6.1%                                                                |
| S <sub>13</sub> | 4.67                        | 266                              | 0.00 | H-11→L 77.0%, H-11→L+10 9.1%                                                                          |
| S <sub>14</sub> | 4.69                        | 264                              | 0.02 | H-1→L+2 29.0%, H→L+2 19.7%, H-2→L+2 9.9%,<br>H→L+6 6.3%, H-2→L+1 5.9%, H-1→L+1 5.1%                   |
| S <sub>15</sub> | 4.75                        | 261                              | 0.01 | H→L+8 40.6%, H→L+7 24.9%, H-1→L+8 6.6%,<br>H-1→L+2 5.1%                                               |
| S <sub>16</sub> | 4.85                        | 256                              | 0.02 | H→L+5 29.4%, H→L+6 23.5%, H→L+9 9.8%,<br>H-5→L 8.1%, H-1→L+2 6.5%                                     |
| S <sub>17</sub> | 4.96                        | 250                              | 0.08 | H-5→L 61.9%, H→L+6 17.7%                                                                              |
| S <sub>18</sub> | 5.08                        | 244                              | 0.01 | H-3→L 31.3%, H-8→L 20.9%, H-4→L 9.6%,<br>H-2→L+1 5.8%, H-2→L 5.6%, H-3→L+1 5.2%                       |
| S <sub>19</sub> | 5.11                        | 243                              | 0.04 | H-3→L 38.3%, H-8→L 22.8%, H-4→L 6.8%,<br>H-2→L 6.3%                                                   |
| S <sub>20</sub> | 5.27                        | 235                              | 0.01 | H-4→L 64.4%, H-2→L+1 11.2%, H-8→L 6.8%                                                                |
| S <sub>21</sub> | 5.36                        | 231                              | 0.01 | H→L+9 17.0%, H-8→L 14.1%, H-2→L+1 13.8%,<br>H-1→L+3 10.1%, H-1→L+6 7.2%, H-1→L+5 6.5%,<br>H-4→L 5.6%  |
| S <sub>22</sub> | 5.37                        | 231                              | 0.00 | H-1→L+3 39.1%, H-3→L 8.6%, H-2→L+3 6.0%                                                               |
| S <sub>23</sub> | 5.41                        | 229                              | 0.03 | H-2→L+2 16.8%, H-2→L+1 15.8%, H-1→L+2 14.2%,<br>H-8→L+2 8.0%, H-8→L 7.4%, H→L+9 6.5%                  |
| S <sub>24</sub> | 5.47                        | 227                              | 0.07 | H-6→L 31.0%, H-3→L 12.3%, H-1→L+3 10.0%,<br>H-3→L+1 7.3%, H→L+9 6.4%                                  |
| S <sub>25</sub> | 5.51                        | 225                              | 0.01 | H-2→L+2 26.5%, H-2→L+1 23.9%, H→L+9 13.3%,<br>H-8→L+1 5.4%                                            |

## TPA-Pyc (conf2)

| Excited state   | $E_{\text{vert}}/\text{eV}$ | $\lambda_{\text{cal}}/\text{nm}$ | $f$  | assignment                                                                           |
|-----------------|-----------------------------|----------------------------------|------|--------------------------------------------------------------------------------------|
| S <sub>1</sub>  | 2.76                        | 449                              | 1.46 | H→L 74.2%, H-1→L 13.1%, H→L+1 7.7%                                                   |
| S <sub>2</sub>  | 3.42                        | 363                              | 0.70 | H→L+1 77.1%, H→L 7.5%, H→L+2 6.2%                                                    |
| S <sub>3</sub>  | 3.51                        | 354                              | 0.42 | H-1→L 65.1%, H→L 17.4%, H-2→L 12.6%                                                  |
| S <sub>4</sub>  | 3.95                        | 314                              | 0.03 | H→L+2 55.7%, H-1→L+2 15.4%, H-1→L+1 14.5%                                            |
| S <sub>5</sub>  | 4.04                        | 307                              | 0.05 | H→L+3 82.4%, H-1→L+3 6.9%                                                            |
| S <sub>6</sub>  | 4.07                        | 305                              | 0.00 | H-9→L 83.7%, H-9→L+2 6.8%                                                            |
| S <sub>7</sub>  | 4.20                        | 296                              | 0.28 | H→L+4 84.0%, H-1→L+4 12.4%                                                           |
| S <sub>8</sub>  | 4.26                        | 291                              | 0.26 | H-2→L 60.5%, H-1→L+1 10.9%, H-8→L 10.8%,<br>H-1→L+1 7.0%                             |
| S <sub>9</sub>  | 4.35                        | 285                              | 0.05 | H-1→L+1 48.9%, H-1→L+2 12.1%, H→L+5 7.9%,<br>H-1→L 6.6%                              |
| S <sub>10</sub> | 4.46                        | 278                              | 0.00 | H-9→L+2 64.5%, H-9→L+1 20.0%, H-9→L 9.1%                                             |
| S <sub>11</sub> | 4.51                        | 275                              | 0.05 | H→L+5 38.0%, H-5→L 17.4%, H-1→L+5 15.9%,<br>H-1→L+1 11.2%, H-5→L+1 6.8%              |
| S <sub>12</sub> | 4.60                        | 270                              | 0.03 | H→L+7 59.8%, H-1→L+3 6.1%, H→L+8 5.9%                                                |
| S <sub>13</sub> | 4.67                        | 266                              | 0.00 | H-11→L 77.2%, H-11→L+10 9.0%                                                         |
| S <sub>14</sub> | 4.68                        | 265                              | 0.03 | H-1→L+2 26.5%, H→L+2 16.9%, H→L+6 11.1%,<br>H-2→L+2 8.0%, H→L+1 7.0%, H-2→L+1 6.2%   |
| S <sub>15</sub> | 4.75                        | 261                              | 0.01 | H→L+8 59.6%, H-1→L+8 10.2%, H→L+7 6.8%                                               |
| S <sub>16</sub> | 4.86                        | 255                              | 0.02 | H→L+6 50.9%, H-1→L+2 10.3%, H→L+9 9.7%,<br>H→L+2 7.7%                                |
| S <sub>17</sub> | 4.95                        | 250                              | 0.07 | H-5→L 65.7%, H→L+5 17.6%                                                             |
| S <sub>18</sub> | 5.08                        | 244                              | 0.03 | H-3→L 41.9%, H-8→L 16.2%, H-4→L 5.7%,<br>H-3→L+1 5.6%, H-2→L 5.3%                    |
| S <sub>19</sub> | 5.10                        | 243                              | 0.01 | H-8→L 27.8%, H-3→L 27.5%, H-4→L 12.6%,<br>H-2→L 8.0%                                 |
| S <sub>20</sub> | 5.27                        | 235                              | 0.00 | H-4→L 63.9%, H-2→L+1 12.7%, H-8→L 7.9%                                               |
| S <sub>21</sub> | 5.36                        | 232                              | 0.01 | H-1→L+3 21.5%, H-2→L+1 16.1%, H-8→L 11.5%,<br>H→L+9 10.5%, H-1→L+6 8.5%, H-4→L 5.5%  |
| S <sub>22</sub> | 5.37                        | 231                              | 0.00 | H-1→L+3 24.5%, H-3→L 12.1%, H→L+7 6.8%                                               |
| S <sub>23</sub> | 5.40                        | 230                              | 0.06 | H-2→L+1 18.9%, H-2→L+2 14.0%, H-1→L+2 13.6%,<br>H-8→L 8.0%, H-8→L+2 7.1%, H→L+9 5.6% |
| S <sub>24</sub> | 5.46                        | 227                              | 0.05 | H-6→L 21.0%, H-1→L+3 12.6%, H-3→L 11.8%,<br>H-7→L 8.8%, H-3→L+1 7.9%                 |
| S <sub>25</sub> | 5.50                        | 226                              | 0.01 | H→L+9 22.7%, H-2→L+2 21.3%, H-2→L+1 12.7%,<br>H→L+12 6.7%, H-8→L+1 5.7%              |

## TPA-Pyc (conf3)

| Excited state   | $E_{\text{vert}}/\text{eV}$ | $\lambda_{\text{cal}}/\text{nm}$ | $f$  | assignment                                                                                         |
|-----------------|-----------------------------|----------------------------------|------|----------------------------------------------------------------------------------------------------|
| S <sub>1</sub>  | 2.78                        | 445                              | 1.83 | H→L 73.0%, H-1→L 12.7%, H→L+1 10.9%                                                                |
| S <sub>2</sub>  | 3.47                        | 357                              | 0.43 | H→L+1 81.0%, H→L 7.1%                                                                              |
| S <sub>3</sub>  | 3.54                        | 350                              | 0.56 | H-1→L 62.7%, H→L 19.1%, H-2→L 12.2%                                                                |
| S <sub>4</sub>  | 3.94                        | 315                              | 0.01 | H→L+2 62.3%, H-1→L+2 28.9%, H-2→L+2 5.6%                                                           |
| S <sub>5</sub>  | 4.04                        | 307                              | 0.04 | H→L+3 83.6%, H-1→L+3 7.0%                                                                          |
| S <sub>6</sub>  | 4.13                        | 300                              | 0.00 | H-9→L 91.6%                                                                                        |
| S <sub>7</sub>  | 4.20                        | 295                              | 0.28 | H→L+4 84.1%, H-1→L+4 12.4%                                                                         |
| S <sub>8</sub>  | 4.28                        | 290                              | 0.07 | H-2→L 54.6%, H-1→L+1 18.0%, H-8→L 9.3%,<br>H-1→L 7.9%                                              |
| S <sub>9</sub>  | 4.38                        | 283                              | 0.06 | H-1→L+1 51.4%, H→L+5 12.9%, H-2→L 11.0%,<br>H-1→L 9.8%                                             |
| S <sub>10</sub> | 4.40                        | 282                              | 0.00 | H-9→L+2 93.5%                                                                                      |
| S <sub>11</sub> | 4.51                        | 275                              | 0.07 | H→L+5 25.1%, H-5→L 16.1%, H→L+6 13.3%,<br>H-1→L+5 13.2%, H-1→L+1 11.9%, H-5→L+1 7.3%               |
| S <sub>12</sub> | 4.60                        | 269                              | 0.03 | H→L+7 54.4%, H→L+8 11.3%, H-1→L+3 6.0%,<br>H-6→L+1 5.0%,                                           |
| S <sub>13</sub> | 4.67                        | 265                              | 0.00 | H-11→L 77.0%, H-11→L+10 9.3%                                                                       |
| S <sub>14</sub> | 4.70                        | 264                              | 0.02 | H-1→L+2 40.5%, H→L+2 35.2%, H-2→L+2 17.2%                                                          |
| S <sub>15</sub> | 4.74                        | 261                              | 0.01 | H→L+8 55.8%, H→L+7 12.6%, H-1→L+8 9.2%                                                             |
| S <sub>16</sub> | 4.84                        | 256                              | 0.02 | H→L+6 38.4%, H→L+5 21.9%, H→L+9 11.4%,<br>H-1→L+1 7.9%                                             |
| S <sub>17</sub> | 5.00                        | 248                              | 0.07 | H-5→L 67.8%, H→L+6 10.8%, H→L+5 10.4%                                                              |
| S <sub>18</sub> | 5.10                        | 243                              | 0.04 | H-3→L 43.7%, H-8→L 12.8%, H-3→L+1 9.3%,<br>H-4→L 5.1%                                              |
| S <sub>19</sub> | 5.13                        | 242                              | 0.03 | H-8→L 31.7%, H-3→L 22.1%, H-4→L 12.5%,<br>H-2→L 7.8%, H-2→L+1 6.4%                                 |
| S <sub>20</sub> | 5.30                        | 234                              | 0.01 | H-4→L 61.6%, H-2→L+1 11.2%, H-8→L 7.2%                                                             |
| S <sub>21</sub> | 5.37                        | 231                              | 0.01 | H-1→L+3 33.4%, H-8→L 10.9%, H→L+9 10.2%,<br>H-4→L 7.1%, H-2→L+1 5.7%                               |
| S <sub>22</sub> | 5.37                        | 231                              | 0.00 | H-1→L+3 16.0%, H-3→L 10.3%, H→L+9 8.3%,<br>H→L+6 6.2%, H-2→L+1 5.2%                                |
| S <sub>23</sub> | 5.41                        | 229                              | 0.04 | H-2→L+2 38.6%, H-1→L+2 20.5%, H-8→L+2 14.5%                                                        |
| S <sub>24</sub> | 5.48                        | 226                              | 0.07 | H-6→L 27.3%, H-3→L 16.0%, H-1→L+3 9.8%,<br>H-3→L+1 9.0%, H-6→L+1 6.1%, H-2→L+1 5.8%,<br>H-7→L 5.5% |
| S <sub>25</sub> | 5.50                        | 226                              | 0.00 | H-2→L+1 42.5%, H→L+9 22.0%, H-8→L 7.0%,<br>H→L+12 6.4%                                             |

TPA-Pyc (conf4)

| Excited state   | $E_{\text{vert}}/\text{eV}$ | $\lambda_{\text{cal}}/\text{nm}$ | $f$  | assignment                                                                                         |
|-----------------|-----------------------------|----------------------------------|------|----------------------------------------------------------------------------------------------------|
| S <sub>1</sub>  | 2.79                        | 445                              | 1.76 | H→L 73.1%, H-1→L 12.7%, H→L+1 10.5%                                                                |
| S <sub>2</sub>  | 3.46                        | 359                              | 0.49 | H→L+1 80.3%, H→L 8.2%                                                                              |
| S <sub>3</sub>  | 3.54                        | 351                              | 0.50 | H-1→L 64.2%, H→L 17.9%, H-2→L 12.4%                                                                |
| S <sub>4</sub>  | 3.93                        | 315                              | 0.02 | H→L+2 61.5%, H-1→L+2 27.0%, H-2→L+2 5.3%                                                           |
| S <sub>5</sub>  | 4.04                        | 307                              | 0.04 | H→L+3 83.6%, H-1→L+3 7.0%                                                                          |
| S <sub>6</sub>  | 4.14                        | 300                              | 0.00 | H-9→L 91.5%                                                                                        |
| S <sub>7</sub>  | 4.20                        | 295                              | 0.28 | H→L+4 84.0%, H-1→L+4 12.4%                                                                         |
| S <sub>8</sub>  | 4.28                        | 290                              | 0.09 | H-2→L 49.9%, H-1→L+1 22.5%, H-8→L 8.2%,<br>H-1→L 6.5%                                              |
| S <sub>9</sub>  | 4.36                        | 284                              | 0.08 | H-1→L+1 42.3%, H-2→L 16.2%, H→L+5 11.3%,<br>H-1→L 10.9%                                            |
| S <sub>10</sub> | 4.40                        | 282                              | 0.00 | H-9→L+2 90.1%                                                                                      |
| S <sub>11</sub> | 4.52                        | 274                              | 0.04 | H→L+5 33.1%, H-5→L 16.3%, H-1→L+1 15.3%,<br>H-1→L+5 15.0%, H-5→L+1 7.2%                            |
| S <sub>12</sub> | 4.60                        | 269                              | 0.03 | H→L+7 54.6%, H→L+8 11.6%, H-1→L+3 6.1%                                                             |
| S <sub>13</sub> | 4.67                        | 265                              | 0.00 | H-11→L 77.0%, H-11→L+10 9.3%                                                                       |
| S <sub>14</sub> | 4.69                        | 264                              | 0.02 | H-1→L+2 36.7%, H→L+2 31.5%, H-2→L+2 15.1%                                                          |
| S <sub>15</sub> | 4.74                        | 261                              | 0.01 | H→L+8 54.7%, H→L+7 12.5%, H-1→L+8 9.1%                                                             |
| S <sub>16</sub> | 4.84                        | 256                              | 0.02 | H→L+6 48.8%, H→L+9 10.5%, H→L+5 9.6%,<br>H-1→L+1 5.7%                                              |
| S <sub>17</sub> | 5.00                        | 248                              | 0.04 | H-5→L 65.0%, H→L+5 14.0%, H→L+6 9.9%                                                               |
| S <sub>18</sub> | 5.10                        | 243                              | 0.01 | H-3→L 46.5%, H-8→L 9.8%, H-3→L+1 9.5%,<br>H-4→L 5.4%                                               |
| S <sub>19</sub> | 5.13                        | 242                              | 0.08 | H-8→L 34.4%, H-3→L 18.9%, H-4→L 13.5%,<br>H-2→L 9.3%, H-2→L+1 6.8%                                 |
| S <sub>20</sub> | 5.30                        | 234                              | 0.03 | H-4→L 60.9%, H-2→L+1 12.9%, H-8→L 8.0%                                                             |
| S <sub>21</sub> | 5.36                        | 231                              | 0.01 | H-1→L+3 38.5%, H-8→L 9.1%, H→L+9 6.5%,<br>H-4→L 6.3%, H-2→L+1 5.5%, H-1→L+7 5.2%                   |
| S <sub>22</sub> | 5.38                        | 231                              | 0.00 | H-3→L 12.0%, H→L+9 11.3%, H-1→L+3 10.2%,<br>H-1→L+6 9.8%, H-2→L+1 8.3%, H→L+6 5.9%,<br>H-8→L 5.6%  |
| S <sub>23</sub> | 5.40                        | 230                              | 0.05 | H-2→L+2 37.4%, H-1→L+2 21.9%, H-8→L+2 15.2%,<br>H-2→L+1 5.3%                                       |
| S <sub>24</sub> | 5.47                        | 227                              | 0.07 | H-6→L 16.8%, H-2→L+1 15.3%, H-3→L 13.7%,<br>H-1→L+3 10.5%, H-3→L+1 8.6%, H-7→L 5.8%,<br>H-7→L 5.5% |
| S <sub>25</sub> | 5.49                        | 226                              | 0.02 | H→L+9 26.2%, H-2→L+1 23.5%, H-6→L 6.4%,<br>H→L+12 6.1%, H-1→L+6 5.3%                               |

Table S14. Electronic excitation properties of various conformations of TE-Pyc in toluene using MN15.

TE-Pyc (conf1)

| Excited state   | $E_{\text{vert}}/\text{eV}$ | $\lambda_{\text{cal}}/\text{nm}$ | $f$  | assignment                                                                        |
|-----------------|-----------------------------|----------------------------------|------|-----------------------------------------------------------------------------------|
| S <sub>1</sub>  | 2.75                        | 451                              | 1.78 | H→L 68.7%, H-1→L 13.7%, H→L+1 11.6%                                               |
| S <sub>2</sub>  | 3.36                        | 369                              | 0.69 | H→L+1 73.9%, H→L 12.4%                                                            |
| S <sub>3</sub>  | 3.40                        | 364                              | 0.50 | H-1→L 57.3%, H→L 18.3%, H-2→L 11.7%,<br>H-4→L 6.5%                                |
| S <sub>4</sub>  | 3.71                        | 334                              | 0.51 | H→L+3 76.7%, H-1→L+3 5.2%                                                         |
| S <sub>5</sub>  | 3.92                        | 316                              | 0.01 | H→L+2 55.3%, H-1→L+2 28.4%, H-2→L+2 7.9%                                          |
| S <sub>6</sub>  | 3.96                        | 313                              | 0.03 | H→L+4 85.7%                                                                       |
| S <sub>7</sub>  | 4.07                        | 305                              | 0.16 | H-2→L 37.1%, H-4→L 27.5%, H-1→L 24.0%                                             |
| S <sub>8</sub>  | 4.13                        | 300                              | 0.00 | H-11→L 91.6%                                                                      |
| S <sub>9</sub>  | 4.24                        | 292                              | 0.03 | H-1→L+1 70.1%, H→L+5 8.6%, H-2→L+1 5.1%                                           |
| S <sub>10</sub> | 4.40                        | 282                              | 0.00 | H-11→L+2 93.7%                                                                    |
| S <sub>11</sub> | 4.48                        | 277                              | 0.13 | H→L+9 12.4%, H→L+7 9.6%, H→L+6 8.6%,<br>H→L+5 7.7%, H-2→L 6.8%, H-4→L 5.6%        |
| S <sub>12</sub> | 4.48                        | 277                              | 0.00 | H-2→L 26.2%, H-4→L 19.7%, H-3→L 9.0%,<br>H→L+5 7.2%, H-7→L 5.2%                   |
| S <sub>13</sub> | 4.50                        | 276                              | 0.00 | H→L+7 25.8%, H→L+9 13.9%, H-7→L 6.4%,<br>H→L+6 6.4%                               |
| S <sub>14</sub> | 4.50                        | 275                              | 0.02 | H-3→L 78.9%, H-4→L 6.2%                                                           |
| S <sub>15</sub> | 4.57                        | 272                              | 0.13 | H-1→L+3 23.7%, H-2→L+3 14.0%, H-2→L 9.4%,<br>H-2→L+1 7.2%, H-4→L 6.6%, H→L+5 5.6% |
| S <sub>16</sub> | 4.58                        | 271                              | 0.06 | H→L+2 37.9%, H-1→L+2 28.7%, H-2→L+2 10.5%,<br>H-4→L+2 8.9%                        |
| S <sub>17</sub> | 4.62                        | 269                              | 0.01 | H→L+8 31.3%, H→L+5 19.1%, H→L+6 17.4%                                             |
| S <sub>18</sub> | 4.65                        | 267                              | 0.01 | H→L+8 31.5%, H→L+6 9.5%, H-1→L+3 8.0%,<br>H→L+5 7.7%                              |
| S <sub>19</sub> | 4.67                        | 265                              | 0.00 | H-13→L 76.9%, H-13→L+11 6.0%, H-13→L+10 5.0%                                      |
| S <sub>20</sub> | 4.70                        | 264                              | 0.14 | H-3→L+3 66.3%, H-3→L+1 17.8%                                                      |
| S <sub>21</sub> | 4.99                        | 249                              | 0.06 | H-7→L 66.6%, H→L+6 13.4%, H→L+5 6.3%                                              |
| S <sub>22</sub> | 5.02                        | 247                              | 0.02 | H-2→L+1 53.5%, H-1→L+3 13.6%                                                      |
| S <sub>23</sub> | 5.10                        | 243                              | 0.03 | H-6→L 44.4%, H-6→L+1 11.6%, H-5→L 6.7%                                            |
| S <sub>24</sub> | 5.13                        | 242                              | 0.01 | H→L+9 21.6%, H→L+7 15.0%, H→L+10 13.0%,<br>H-1→L+3 6.7%, H-9→L 5.0%               |
| S <sub>25</sub> | 5.16                        | 240                              | 0.01 | H-9→L 16.4%, H-5→L 12.5%, H→L+7 11.9%,<br>H-4→L 7.2%, H-4→L+1 6.4%, H-1→L+4 6.3%  |

## TE-Pyc (conf4)

| Excited state   | $E_{\text{vert}}/\text{eV}$ | $\lambda_{\text{cal}}/\text{nm}$ | $f$  | assignment                                                                                                                 |
|-----------------|-----------------------------|----------------------------------|------|----------------------------------------------------------------------------------------------------------------------------|
| S <sub>1</sub>  | 2.73                        | 455                              | 1.63 | H→L 69.5%, H-1→L 14.4%, H→L+1 9.0%                                                                                         |
| S <sub>2</sub>  | 3.34                        | 372                              | 0.83 | H→L+1 71.1%, H→L 10.5%, H→L+2 5.3%                                                                                         |
| S <sub>3</sub>  | 3.38                        | 367                              | 0.34 | H-1→L 56.4%, H→L 19.2%, H-2→L 11.3%,<br>H-4→L 6.7%                                                                         |
| S <sub>4</sub>  | 3.70                        | 335                              | 0.54 | H→L+3 74.5%, H-1→L+3 5.4%, H-1→L+1 5.2%                                                                                    |
| S <sub>5</sub>  | 3.94                        | 315                              | 0.07 | H→L+2 38.4%, H→L+4 20.6%, H-1→L+2 15.9%,<br>H-1→L+1 6.2%                                                                   |
| S <sub>6</sub>  | 3.96                        | 313                              | 0.04 | H→L+4 66.2%, H→L+2 11.4%, H-1→L+2 5.3%                                                                                     |
| S <sub>7</sub>  | 4.06                        | 306                              | 0.21 | H-2→L 32.7%, H-4→L 29.7%, H-1→L 24.2%                                                                                      |
| S <sub>8</sub>  | 4.07                        | 305                              | 0.00 | H-11→L 83.8%, H-11→L+2 7.4%                                                                                                |
| S <sub>9</sub>  | 4.23                        | 293                              | 0.06 | H-1→L+1 59.0%, H→L+5 8.7%, H-1→L+2 7.1%                                                                                    |
| S <sub>10</sub> | 4.46                        | 278                              | 0.00 | H-11→L+2 62.4%, H-11→L+1 11.7%, H-11→L 7.8%                                                                                |
| S <sub>11</sub> | 4.46                        | 278                              | 0.02 | H-2→L 28.1%, H-4→L 20.4%, H-11→L+2 8.7%,<br>H→L+8 6.0%                                                                     |
| S <sub>12</sub> | 4.47                        | 277                              | 0.03 | H→L+8 24.1%, H→L+5 8.2%, H-1→L+1 6.9%,<br>H-2→L 6.7%, H→L+6 5.0%                                                           |
| S <sub>13</sub> | 4.49                        | 276                              | 0.02 | H-7→L 14.1%, H→L+8 13.7%, H→L+6 11.8%,<br>H-1→L+6 9.5%, H→L+5 9.0%, H-1→L+5 6.4%                                           |
| S <sub>14</sub> | 4.51                        | 275                              | 0.01 | H-3→L 80.5%                                                                                                                |
| S <sub>15</sub> | 4.55                        | 273                              | 0.13 | H-1→L+3 15.9%, H-2→L+3 13.0%, H→L+5 7.9%,<br>H→L+7 6.6%, H-2→L+1 6.4%, H-4→L 6.2%,<br>H-1→L+2 6.2%, H→L+2 5.4%, H-2→L 5.1% |
| S <sub>16</sub> | 4.60                        | 270                              | 0.05 | H→L+2 16.8%, H-1→L+2 15.7%, H-1→L+3 11.6%,<br>H-2→L+2 10.9%, H→L+6 5.5%, H→L+9 5.1%                                        |
| S <sub>17</sub> | 4.64                        | 267                              | 0.04 | H→L+7 20.5%, H→L+8 13.4%, H→L+9 9.7%,<br>H-1→L+3 7.5%, H→L+5 5.5%                                                          |
| S <sub>18</sub> | 4.66                        | 266                              | 0.03 | H→L+9 19.3%, H→L+5 19.2%, H→L+2 11.2%,<br>H→L+6 11.0%, H-1→L+2 9.2%                                                        |
| S <sub>19</sub> | 4.67                        | 266                              | 0.00 | H-13→L 77.0%, H-13→L+11 6.0%                                                                                               |
| S <sub>20</sub> | 4.70                        | 264                              | 0.14 | H-3→L+3 61.6%, H-3→L+1 14.7%                                                                                               |
| S <sub>21</sub> | 4.95                        | 251                              | 0.08 | H-7→L 66.6%, H→L+6 14.6%                                                                                                   |
| S <sub>22</sub> | 5.02                        | 247                              | 0.00 | H-2→L+1 47.1%, H-1→L+3 11.5%, H-3→L+1 6.3%                                                                                 |
| S <sub>23</sub> | 5.07                        | 244                              | 0.02 | H-6→L 35.4%, H-5→L 10.6%, H-6→L+1 6.0%,<br>H-9→L 5.3%                                                                      |
| S <sub>24</sub> | 5.12                        | 242                              | 0.00 | H→L+7 15.7%, H→L+9 12.0%, H→L+10 10.3%,<br>H-9→L 8.6%, H-1→L+3 8.3%                                                        |
| S <sub>25</sub> | 5.17                        | 240                              | 0.02 | H-1→L+4 22.4%, H-5→L 18.2%, H→L+9 9.5%,<br>H→L+8 8.1%, H-9→L 7.7%, H-2→L+1 6.3%                                            |



## TE-Pyc (conf5)

| Excited state   | $E_{\text{vert}}/\text{eV}$ | $\lambda_{\text{cal}}/\text{nm}$ | $f$  | assignment                                                                                          |
|-----------------|-----------------------------|----------------------------------|------|-----------------------------------------------------------------------------------------------------|
| S <sub>1</sub>  | 2.74                        | 452                              | 1.70 | H→L 68.9%, H-1→L 13.7%, H→L+1 11.3%                                                                 |
| S <sub>2</sub>  | 3.34                        | 371                              | 0.79 | H→L+1 71.7%, H→L 13.7%                                                                              |
| S <sub>3</sub>  | 3.39                        | 365                              | 0.47 | H-1→L 57.8%, H→L 16.7%, H-2→L 11.1%,<br>H-4→L 6.3%                                                  |
| S <sub>4</sub>  | 3.69                        | 336                              | 0.46 | H→L+3 76.4%                                                                                         |
| S <sub>5</sub>  | 3.92                        | 317                              | 0.01 | H→L+2 54.4%, H-1→L+2 27.4%, H-2→L+2 6.7%                                                            |
| S <sub>6</sub>  | 3.96                        | 313                              | 0.05 | H→L+4 87.1%                                                                                         |
| S <sub>7</sub>  | 4.07                        | 305                              | 0.17 | H-2→L 34.4%, H-4→L 27.3%, H-1→L 23.7%,<br>H-3→L 5.5%                                                |
| S <sub>8</sub>  | 4.14                        | 300                              | 0.00 | H-11→L 91.5%                                                                                        |
| S <sub>9</sub>  | 4.22                        | 294                              | 0.04 | H-1→L+1 64.7%, H→L+5 10.7%                                                                          |
| S <sub>10</sub> | 4.40                        | 282                              | 0.00 | H-11→L+2 91.2%                                                                                      |
| S <sub>11</sub> | 4.44                        | 279                              | 0.04 | H→L+7 39.1%, H→L+9 7.4%, H-1→L+3 6.2%,<br>H→L+5 6.0%, H-1→L+4 5.5%                                  |
| S <sub>12</sub> | 4.48                        | 277                              | 0.02 | H-2→L 27.5%, H-3→L 14.4%, H-4→L 12.7%,<br>H-1→L+1 6.8%, H→L+5 6.6%                                  |
| S <sub>13</sub> | 4.49                        | 276                              | 0.00 | H→L+5 16.2%, H-3→L 13.8%, H-7→L 10.6%,<br>H-2→L 9.5%, H-1→L+5 8.6%, H→L+6 8.3%,<br>H-1→L+6 6.8%     |
| S <sub>14</sub> | 4.52                        | 275                              | 0.03 | H-3→L 58.5%, H-4→L 16.0%                                                                            |
| S <sub>15</sub> | 4.56                        | 272                              | 0.01 | H→L+2 27.3%, H-1→L+2 22.5%, H-1→L+3 7.4%,<br>H-2→L+3 6.4%, H-4→L+2 6.4%, H-2→L+2 5.4%               |
| S <sub>16</sub> | 4.58                        | 271                              | 0.20 | H-1→L+3 22.3%, H-2→L+3 13.2%, H→L+2 10.1%,<br>H-2→L 6.8%, H-1→L+2 6.7%, H-4→L 6.0%,<br>H-2→L+1 5.5% |
| S <sub>17</sub> | 4.63                        | 268                              | 0.02 | H→L+8 33.7%, H→L+9 16.0%, H→L+6 10.9%,<br>H→L+5 8.7%                                                |
| S <sub>18</sub> | 4.64                        | 267                              | 0.03 | H→L+8 32.4%, H→L+6 16.5%, H→L+5 13.7%                                                               |
| S <sub>19</sub> | 4.67                        | 265                              | 0.00 | H-13→L 77.0%, H-13→L+11 5.7%, H-13→L+10 5.3%                                                        |
| S <sub>20</sub> | 4.70                        | 264                              | 0.13 | H-3→L+3 63.9%, H-3→L+1 16.4%                                                                        |
| S <sub>21</sub> | 4.98                        | 249                              | 0.03 | H-7→L 61.8%, H→L+6 12.1%, H→L+5 7.1%                                                                |
| S <sub>22</sub> | 5.02                        | 247                              | 0.05 | H-2→L+1 48.6%, H-1→L+3 14.8%, H-3→L+1 8.4%,<br>H-7→L 5.8%                                           |
| S <sub>23</sub> | 5.08                        | 244                              | 0.01 | H-6→L 37.4%, H-6→L+1 9.4%, H→L+7 9.1%,<br>H-5→L 7.2%                                                |
| S <sub>24</sub> | 5.12                        | 242                              | 0.01 | H→L+7 17.1%, H→L+9 12.1%, H→L+10 9.7%,<br>H-9→L 7.8%, H-1→L+3 6.4%, H→L+6 5.4%                      |
| S <sub>25</sub> | 5.18                        | 239                              | 0.03 | H→L+9 23.8%, H-1→L+4 16.2%, H-5→L 15.8%,<br>H-9→L 8.6%                                              |

## TE-Pyc (conf6)

| Excited state   | $E_{\text{vert}}/\text{eV}$ | $\lambda_{\text{cal}}/\text{nm}$ | $f$  | assignment                                                                                                   |
|-----------------|-----------------------------|----------------------------------|------|--------------------------------------------------------------------------------------------------------------|
| S <sub>1</sub>  | 2.75                        | 451                              | 1.74 | H→L 68.7%, H-1→L 13.8%, H→L+1 11.3%                                                                          |
| S <sub>2</sub>  | 3.35                        | 370                              | 0.81 | H→L+1 72.7%, H→L 13.1%                                                                                       |
| S <sub>3</sub>  | 3.40                        | 364                              | 0.46 | H-1→L 57.5%, H→L 17.4%, H-2→L 11.1%,<br>H-4→L 6.5%                                                           |
| S <sub>4</sub>  | 3.71                        | 334                              | 0.43 | H→L+3 76.8%, H-1→L+3 5.3%                                                                                    |
| S <sub>5</sub>  | 3.92                        | 316                              | 0.01 | H→L+2 54.2%, H-1→L+2 27.4%, H-2→L+2 6.7%                                                                     |
| S <sub>6</sub>  | 3.96                        | 313                              | 0.04 | H→L+4 86.5%                                                                                                  |
| S <sub>7</sub>  | 4.08                        | 304                              | 0.17 | H-2→L 34.4%, H-4→L 27.9%, H-1→L 23.9%                                                                        |
| S <sub>8</sub>  | 4.13                        | 300                              | 0.00 | H-11→L 91.5%                                                                                                 |
| S <sub>9</sub>  | 4.23                        | 293                              | 0.04 | H-1→L+1 65.1%, H→L+5 10.9%                                                                                   |
| S <sub>10</sub> | 4.40                        | 282                              | 0.00 | H-11→L+2 91.2%                                                                                               |
| S <sub>11</sub> | 4.47                        | 277                              | 0.05 | H→L+8 36.4%, H-2→L 7.7%, H-4→L 6.7%,<br>H-1→L+4 6.4%, H→L+5 6.3%                                             |
| S <sub>12</sub> | 4.48                        | 277                              | 0.04 | H-2→L 25.5%, H-4→L 13.8%, H-3→L 9.6%,<br>H-1→L+1 5.7%, H-1→L+3 5.5%, H→L+8 5.3%,<br>H-2→L+3 5.2%             |
| S <sub>13</sub> | 4.50                        | 276                              | 0.00 | H→L+5 12.2%, H→L+8 11.4%, H-7→L 11.2%,<br>H→L+6 10.5%, H-1→L+6 9.0%, H-3→L 7.2%,<br>H-1→L+5 6.7%, H-2→L 5.5% |
| S <sub>14</sub> | 4.52                        | 274                              | 0.02 | H-3→L 65.3%, H-4→L 8.9%                                                                                      |
| S <sub>15</sub> | 4.55                        | 272                              | 0.05 | H→L+2 12.9%, H-1→L+3 12.8%, H-1→L+2 9.7%,<br>H-2→L+3 9.6%, H→L+7 7.6%, H→L+5 6.4%,<br>H-2→L 5.1%             |
| S <sub>16</sub> | 4.58                        | 270                              | 0.12 | H→L+2 25.0%, H-1→L+2 18.6%, H-1→L+3 8.3%,<br>H-2→L+2 7.7%, H-4→L+2 5.1%                                      |
| S <sub>17</sub> | 4.64                        | 267                              | 0.06 | H→L+5 16.3%, H→L+7 14.3%, H→L+6 14.3%,<br>H-1→L+3 9.1%, H→L+3 6.5%, H-2→L+3 5.7%,<br>H-2→L+1 5.4%            |
| S <sub>18</sub> | 4.65                        | 267                              | 0.01 | H→L+9 30.0%, H→L+7 14.7%, H→L+5 10.3%,<br>H→L+6 6.8%, H→L+8 5.9%                                             |
| S <sub>19</sub> | 4.67                        | 265                              | 0.00 | H-13→L 77.0%, H-13→L+11 5.8%, H-13→L+10 5.3%                                                                 |
| S <sub>20</sub> | 4.70                        | 264                              | 0.14 | H-3→L+3 62.3%, H-3→L+1 16.4%                                                                                 |
| S <sub>21</sub> | 4.98                        | 249                              | 0.03 | H-7→L 64.0%, H→L+6 15.2%                                                                                     |
| S <sub>22</sub> | 5.03                        | 247                              | 0.04 | H-2→L+1 48.9%, H-1→L+3 15.0%, H-3→L+1 7.5%                                                                   |
| S <sub>23</sub> | 5.09                        | 244                              | 0.01 | H-6→L 37.0%, H-6→L+1 9.8%, H→L+7 9.0%,<br>H-5→L 7.6%                                                         |
| S <sub>24</sub> | 5.14                        | 241                              | 0.00 | H→L+9 23.7%, H→L+7 12.7%, H→L+10 11.0%,<br>H-9→L 6.7%                                                        |
| S <sub>25</sub> | 5.18                        | 240                              | 0.01 | H-1→L+4 30.3%, H-5→L 11.9%, H→L+8 10.5%,<br>H-9→L 8.8%                                                       |

## TE-Pyc (conf7)

| Excited state   | $E_{\text{vert}}/\text{eV}$ | $\lambda_{\text{cal}}/\text{nm}$ | $f$  | assignment                                                                                                                  |
|-----------------|-----------------------------|----------------------------------|------|-----------------------------------------------------------------------------------------------------------------------------|
| S <sub>1</sub>  | 2.75                        | 451                              | 1.73 | H→L 68.9%, H-1→L 13.7%, H→L+1 11.3%                                                                                         |
| S <sub>2</sub>  | 3.35                        | 370                              | 0.80 | H→L+1 72.5%, H→L 13.1%                                                                                                      |
| S <sub>3</sub>  | 3.40                        | 364                              | 0.46 | H-1→L 57.4%, H→L 17.3%, H-2→L 12.1%,<br>H-4→L 6.5%                                                                          |
| S <sub>4</sub>  | 3.70                        | 335                              | 0.43 | H→L+3 76.8%, H-1→L+3 5.3%                                                                                                   |
| S <sub>5</sub>  | 3.92                        | 316                              | 0.01 | H→L+2 54.4%, H-1→L+2 27.1%, H-2→L+2 7.3%                                                                                    |
| S <sub>6</sub>  | 3.96                        | 313                              | 0.04 | H→L+4 86.5%                                                                                                                 |
| S <sub>7</sub>  | 4.07                        | 304                              | 0.17 | H-2→L 37.1%, H-4→L 27.4%, H-1→L 24.1%                                                                                       |
| S <sub>8</sub>  | 4.13                        | 300                              | 0.00 | H-11→L 91.5%                                                                                                                |
| S <sub>9</sub>  | 4.23                        | 293                              | 0.04 | H-1→L+1 65.2%, H→L+5 10.7%                                                                                                  |
| S <sub>10</sub> | 4.40                        | 282                              | 0.00 | H-11→L+2 91.1%                                                                                                              |
| S <sub>11</sub> | 4.47                        | 277                              | 0.05 | H→L+8 37.0%, H-4→L 7.0%, H→L+5 6.9%,<br>H-1→L+4 6.5%, H-2→L 6.3%                                                            |
| S <sub>12</sub> | 4.48                        | 277                              | 0.04 | H-2→L 17.1%, H-4→L 14.5%, H-1→L+3 8.7%,<br>H-1→L+1 6.8%, H-2→L+3 6.5%, H→L+6 5.5%                                           |
| S <sub>13</sub> | 4.50                        | 276                              | 0.00 | H→L+8 14.9%, H→L+5 11.1%, H-2→L 9.4%,<br>H-3→L 9.3%, H-7→L 8.7%, H→L+6 7.0%,<br>H-1→L+6 6.8%, H-1→L+5 5.8%                  |
| S <sub>14</sub> | 4.51                        | 275                              | 0.02 | H-3→L 77.7%, H-4→L 5.1%                                                                                                     |
| S <sub>15</sub> | 4.55                        | 272                              | 0.07 | H-1→L+3 16.3%, H-2→L+3 11.1%, H→L+2 10.1%,<br>H-1→L+2 7.8%, H→L+7 7.5%, H-2→L 7.2%,<br>H→L+5 6.1%, H-2→L+1 5.4%, H-4→L 5.3% |
| S <sub>16</sub> | 4.58                        | 271                              | 0.12 | H→L+2 27.4%, H-1→L+2 20.4%, H-2→L+2 9.0%,<br>H-1→L+3 7.7%, H-4→L+2 5.7%                                                     |
| S <sub>17</sub> | 4.64                        | 267                              | 0.05 | H→L+7 16.5%, H→L+6 16.4%, H→L+5 16.1%,<br>H-1→L+3 8.1%, H→L+8 5.3%                                                          |
| S <sub>18</sub> | 4.65                        | 267                              | 0.01 | H→L+9 31.4%, H→L+7 14.5%, H→L+5 9.1%,<br>H→L+6 7.4%, H→L+8 5.9%                                                             |
| S <sub>19</sub> | 4.67                        | 265                              | 0.00 | H-13→L 77.0%, H-13→L+11 5.7%, H-13→L+10 5.4%                                                                                |
| S <sub>20</sub> | 4.70                        | 264                              | 0.14 | H-3→L+3 67.2%, H-3→L+1 16.3%                                                                                                |
| S <sub>21</sub> | 4.98                        | 249                              | 0.03 | H-7→L 62.8%, H→L+6 13.8%, H→L+5 5.7%                                                                                        |
| S <sub>22</sub> | 5.02                        | 247                              | 0.04 | H-2→L+1 52.5%, H-1→L+3 14.6%, H-7→L 5.2%                                                                                    |
| S <sub>23</sub> | 5.08                        | 244                              | 0.01 | H-6→L 37.9%, H-6→L+1 9.8%, H→L+7 8.8%,<br>H-5→L 6.6%                                                                        |
| S <sub>24</sub> | 5.13                        | 242                              | 0.00 | H→L+9 24.4%, H→L+7 13.7%, H→L+10 10.9%,<br>H-9→L 5.7%                                                                       |
| S <sub>25</sub> | 5.17                        | 240                              | 0.01 | H-1→L+4 27.0%, H-5→L 13.8%, H→L+8 10.3%,<br>H-9→L 10.2%                                                                     |

## TE-Pyc (conf8)

| Excited state   | $E_{\text{vert}}/\text{eV}$ | $\lambda_{\text{cal}}/\text{nm}$ | $f$  | assignment                                                                                                      |
|-----------------|-----------------------------|----------------------------------|------|-----------------------------------------------------------------------------------------------------------------|
| S <sub>1</sub>  | 2.75                        | 451                              | 1.87 | H→L 68.4%, H-1→L 14.0%, H→L+1 11.6%                                                                             |
| S <sub>2</sub>  | 3.35                        | 370                              | 0.68 | H→L+1 73.3%, H→L 11.6%, H→L+3 5.3%                                                                              |
| S <sub>3</sub>  | 3.40                        | 365                              | 0.43 | H-1→L 56.0%, H→L 19.3%, H-2→L 12.5%,<br>H-4→L 6.4%                                                              |
| S <sub>4</sub>  | 3.69                        | 336                              | 0.53 | H→L+3 76.6%                                                                                                     |
| S <sub>5</sub>  | 3.92                        | 316                              | 0.01 | H→L+2 54.8%, H-1→L+2 28.6%, H-2→L+2 8.2%                                                                        |
| S <sub>6</sub>  | 3.96                        | 313                              | 0.04 | H→L+4 86.5%                                                                                                     |
| S <sub>7</sub>  | 4.07                        | 304                              | 0.17 | H-2→L 36.9%, H-4→L 28.0%, H-1→L 24.2%                                                                           |
| S <sub>8</sub>  | 4.13                        | 300                              | 0.00 | H-11→L 91.6%                                                                                                    |
| S <sub>9</sub>  | 4.24                        | 292                              | 0.03 | H-1→L+1 68.6%, H→L+5 9.0%                                                                                       |
| S <sub>10</sub> | 4.40                        | 282                              | 0.00 | H-11→L+2 93.8%                                                                                                  |
| S <sub>11</sub> | 4.47                        | 278                              | 0.03 | H→L+8 28.6%, H-4→L 10.8%, H-2→L 9.2%,<br>H→L+7 5.8%, H→L+5 5.7%, H-1→L+4 5.5%                                   |
| S <sub>12</sub> | 4.48                        | 277                              | 0.02 | H-1→L+3 12.9%, H-4→L 11.4%, H-2→L 10.4%,<br>H-2→L+3 8.7%, H→L+6 7.6%, H→L+8 6.7%,<br>H-2→L+1 5.3%, H-1→L+1 5.0% |
| S <sub>13</sub> | 4.49                        | 276                              | 0.00 | H→L+8 20.5%, H-7→L 11.7%, H→L+6 9.2%,<br>H→L+5 8.9%, H-1→L+6 8.4%, H-1→L+5 5.9%,<br>H-2→L 5.6%                  |
| S <sub>14</sub> | 4.52                        | 274                              | 0.02 | H-3→L 89.1%                                                                                                     |
| S <sub>15</sub> | 4.55                        | 272                              | 0.19 | H-1→L+3 21.4%, H-2→L 14.5%, H-2→L+3 12.0%,<br>H-4→L 11.4%, H→L+7 7.8%, H→L+5 5.6%,<br>H-2→L+1 5.6%              |
| S <sub>16</sub> | 4.58                        | 271                              | 0.03 | H→L+2 40.9%, H-1→L+2 29.6%, H-2→L+2 11.9%,<br>H-4→L+2 9.3%                                                      |
| S <sub>17</sub> | 4.62                        | 268                              | 0.06 | H→L+5 19.1%, H→L+6 19.0%, H→L+7 16.9%,<br>H-1→L+3 6.6%, H→L+3 6.5%                                              |
| S <sub>18</sub> | 4.64                        | 267                              | 0.02 | H→L+9 33.7%, H→L+7 13.5%, H→L+5 9.0%,<br>H→L+6 7.2%, H→L+8 5.7%                                                 |
| S <sub>19</sub> | 4.67                        | 265                              | 0.00 | H-13→L 76.9%, H-13→L+10 5.5%, H-13→L+11 5.5%                                                                    |
| S <sub>20</sub> | 4.69                        | 264                              | 0.14 | H-3→L+3 65.9%, H-3→L+1 17.3%, H-3→L 5.0%                                                                        |
| S <sub>21</sub> | 4.99                        | 249                              | 0.08 | H-7→L 65.5%, H→L+6 13.6%, H→L+5 5.8%                                                                            |
| S <sub>22</sub> | 5.02                        | 247                              | 0.01 | H-2→L+1 56.8%, H-1→L+3 14.7%                                                                                    |
| S <sub>23</sub> | 5.08                        | 244                              | 0.04 | H-6→L 38.4%, H-6→L+1 9.9%, H-5→L 6.8%,<br>H→L+7 5.7%                                                            |
| S <sub>24</sub> | 5.13                        | 242                              | 0.01 | H→L+9 18.5%, H→L+7 15.6%, H→L+10 11.7%,<br>H-9→L 7.5%, H-1→L+3 5.9%                                             |
| S <sub>25</sub> | 5.17                        | 240                              | 0.00 | H-1→L+4 30.6%, H-5→L 11.7%, H→L+8 11.7%,<br>H-9→L 7.9%                                                          |

## TE-Pyc (conf9)

| Excited state   | $E_{\text{vert}}/\text{eV}$ | $\lambda_{\text{cal}}/\text{nm}$ | $f$  | assignment                                                                                                      |
|-----------------|-----------------------------|----------------------------------|------|-----------------------------------------------------------------------------------------------------------------|
| S <sub>1</sub>  | 2.75                        | 451                              | 1.78 | H→L 68.7%, H-1→L 13.9%, H→L+1 11.3%                                                                             |
| S <sub>2</sub>  | 3.35                        | 370                              | 0.66 | H→L+1 73.1%, H→L 12.6%                                                                                          |
| S <sub>3</sub>  | 3.40                        | 364                              | 0.38 | H-1→L 57.0%, H→L 18.0%, H-2→L 11.1%,<br>H-4→L 6.4%                                                              |
| S <sub>4</sub>  | 3.71                        | 334                              | 0.62 | H→L+3 76.3%, H-1→L+3 5.0%                                                                                       |
| S <sub>5</sub>  | 3.92                        | 316                              | 0.02 | H→L+2 54.1%, H-1→L+2 27.4%, H-2→L+2 6.7%                                                                        |
| S <sub>6</sub>  | 3.96                        | 313                              | 0.04 | H→L+4 85.6%                                                                                                     |
| S <sub>7</sub>  | 4.08                        | 304                              | 0.19 | H-2→L 33.6%, H-4→L 28.1%, H-1→L 24.0%,<br>H-3→L 5.4%                                                            |
| S <sub>8</sub>  | 4.13                        | 300                              | 0.00 | H-11→L 91.5%                                                                                                    |
| S <sub>9</sub>  | 4.23                        | 293                              | 0.04 | H-1→L+1 66.1%, H→L+5 10.9%                                                                                      |
| S <sub>10</sub> | 4.40                        | 282                              | 0.00 | H-11→L+2 91.2%                                                                                                  |
| S <sub>11</sub> | 4.48                        | 277                              | 0.09 | H→L+9 13.1%, H-2→L 11.1%, H→L+7 9.5%,<br>H-4→L 7.6%, H→L+5 5.9%, H→L+6 5.6%                                     |
| S <sub>12</sub> | 4.49                        | 276                              | 0.01 | H-2→L 26.0%, H-4→L 14.7%, H→L+7 14.0%,<br>H-3→L 8.8%, H→L+5 5.0%                                                |
| S <sub>13</sub> | 4.50                        | 276                              | 0.01 | H→L+7 18.0%, H→L+5 10.5%, H-7→L 9.2%,<br>H→L+6 8.1%, H-1→L+6 7.6%, H→L+9 7.1%,<br>H-1→L+5 5.3%                  |
| S <sub>14</sub> | 4.52                        | 274                              | 0.01 | H-3→L 69.7%, H-4→L 8.0%                                                                                         |
| S <sub>15</sub> | 4.56                        | 272                              | 0.05 | H→L+2 17.2%, H-1→L+2 12.8%, H-1→L+3 10.7%,<br>H-2→L+3 7.8%, H→L+5 6.9%                                          |
| S <sub>16</sub> | 4.59                        | 270                              | 0.11 | H→L+2 17.2%, H-1→L+2 12.2%, H-1→L+3 11.4%,<br>H→L+8 8.9%, H-4→L 6.2%, H-2→L+3 6.2%,<br>H-2→L+2 5.8%, H-2→L 5.5% |
| S <sub>17</sub> | 4.62                        | 269                              | 0.02 | H→L+8 28.5%, H→L+5 18.3%, H→L+6 11.2%,<br>H→L+2 6.5%, H-1→L+2 5.7%                                              |
| S <sub>18</sub> | 4.65                        | 267                              | 0.03 | H→L+8 26.5%, H-1→L+3 8.9%, H→L+6 8.4%,<br>H→L+5 8.0%, H→L+7 6.1%, H-2→L+3 6.1%,<br>H-2→L+1 5.0%                 |
| S <sub>19</sub> | 4.67                        | 265                              | 0.00 | H-13→L 77.0%, H-13→L+11 5.6%, H-13→L+10 5.5%                                                                    |
| S <sub>20</sub> | 4.71                        | 264                              | 0.14 | H-3→L+3 59.4%, H-3→L+1 17.1%                                                                                    |
| S <sub>21</sub> | 4.98                        | 249                              | 0.03 | H-7→L 62.9%, H→L+6 14.8%                                                                                        |
| S <sub>22</sub> | 5.02                        | 247                              | 0.01 | H-2→L+1 45.3%, H-1→L+3 15.0%, H-3→L+1 7.8%,<br>H-7→L 6.0%                                                       |
| S <sub>23</sub> | 5.10                        | 243                              | 0.05 | H-6→L 44.2%, H-6→L+1 11.6%, H-5→L 8.5%                                                                          |
| S <sub>24</sub> | 5.13                        | 242                              | 0.01 | H→L+9 24.1%, H→L+7 17.3%, H→L+10 12.5%                                                                          |
| S <sub>25</sub> | 5.17                        | 240                              | 0.02 | H-9→L 18.0%, H-5→L 13.6%, H→L+7 9.6%,<br>H-1→L+4 9.4%, H-4→L 8.5%, H-10→L 6.2%,<br>H-4→L+1 5.9%                 |

## TE-Pyc (conf10)

| Excited state   | $E_{\text{vert}}/\text{eV}$ | $\lambda_{\text{cal}}/\text{nm}$ | $f$  | assignment                                                                                         |
|-----------------|-----------------------------|----------------------------------|------|----------------------------------------------------------------------------------------------------|
| S <sub>1</sub>  | 2.72                        | 455                              | 1.48 | H→L 70.1%, H-1→L 14.2%, H→L+1 8.5%                                                                 |
| S <sub>2</sub>  | 3.32                        | 374                              | 0.82 | H→L+1 69.2%, H→L 12.2%, H→L+2 6.7%                                                                 |
| S <sub>3</sub>  | 3.37                        | 368                              | 0.28 | H-1→L 57.6%, H→L 17.0%, H-2→L 12.0%,<br>H-4→L 6.5%                                                 |
| S <sub>4</sub>  | 3.68                        | 337                              | 0.61 | H→L+3 73.2%, H-1→L+3 5.3%, H-1→L+1 5.2%                                                            |
| S <sub>5</sub>  | 3.93                        | 316                              | 0.03 | H→L+2 41.8%, H-1→L+2 15.1%, H-1→L+1 11.2%,<br>H→L+4 10.0%                                          |
| S <sub>6</sub>  | 3.98                        | 312                              | 0.10 | H→L+4 75.6%                                                                                        |
| S <sub>7</sub>  | 4.04                        | 307                              | 0.25 | H-2→L 36.0%, H-4→L 28.2%, H-1→L 24.6%                                                              |
| S <sub>8</sub>  | 4.07                        | 305                              | 0.00 | H-11→L 83.6%, H-11→L+2 7.1%                                                                        |
| S <sub>9</sub>  | 4.23                        | 293                              | 0.11 | H-1→L+1 56.8%, H-1→L+2 11.2%, H→L+5 6.6%,<br>H→L+2 6.6%                                            |
| S <sub>10</sub> | 4.45                        | 279                              | 0.01 | H-2→L 16.6%, H-4→L 14.7%, H→L+8 12.6%,<br>H-1→L+3 8.2%, H→L+7 7.9%, H→L+9 5.2%,<br>H-2→L+3 5.1%    |
| S <sub>11</sub> | 4.46                        | 278                              | 0.00 | H-11→L+2 67.0%, H-11→L+1 16.7%, H-11→L 9.1%                                                        |
| S <sub>12</sub> | 4.47                        | 277                              | 0.07 | H-2→L 14.0%, H→L+6 11.1%, H→L+5 10.8%,<br>H-4→L 7.7%, H→L+8 7.2%, H-7→L 7.1%,<br>H-1→L+6 7.0%      |
| S <sub>13</sub> | 4.48                        | 277                              | 0.02 | H-3→L 20.5%, H→L+5 14.8%, H-2→L 10.4%,<br>H→L+8 6.1%, H-7→L 5.5%, H-1→L+1 5.0%                     |
| S <sub>14</sub> | 4.50                        | 276                              | 0.03 | H-3→L 68.8%, H-4→L 10.1%                                                                           |
| S <sub>15</sub> | 4.54                        | 273                              | 0.07 | H→L+8 19.1%, H-1→L+2 11.7%, H→L+2 8.9%,<br>H-2→L+3 7.3%, H-1→L+3 6.6%, H→L+6 6.1%                  |
| S <sub>16</sub> | 4.59                        | 270                              | 0.12 | H-1→L+3 24.1%, H-2→L+3 10.6%, H→L+7 7.4%,<br>H-2→L+2 6.6%, H→L+6 5.7%, H→L+9 5.6%,<br>H-2→L+1 5.0% |
| S <sub>17</sub> | 4.63                        | 268                              | 0.03 | H→L+7 20.2%, H→L+9 16.0%, H→L+2 11.9%,<br>H-1→L+2 11.3%                                            |
| S <sub>18</sub> | 4.67                        | 266                              | 0.03 | H→L+9 23.7%, H→L+5 20.0%, H→L+6 9.4%,<br>H-1→L+2 6.7%, H→L+2 6.5%, H→L+3 6.1%                      |
| S <sub>19</sub> | 4.67                        | 266                              | 0.00 | H-13→L 77.2%, H-13→L+10 5.9%                                                                       |
| S <sub>20</sub> | 4.70                        | 264                              | 0.14 | H-3→L+3 66.1%, H-3→L+1 13.7%, H-3→L+2 6.4%                                                         |
| S <sub>21</sub> | 4.94                        | 251                              | 0.05 | H-7→L 64.0%, H→L+6 14.5%                                                                           |
| S <sub>22</sub> | 4.99                        | 248                              | 0.00 | H-2→L+1 47.0%, H-1→L+3 12.2%, H-7→L 5.5%                                                           |
| S <sub>23</sub> | 5.09                        | 244                              | 0.02 | H-6→L 42.8%, H-5→L 12.8%, H-6→L+1 7.2%                                                             |
| S <sub>24</sub> | 5.11                        | 243                              | 0.00 | H→L+7 17.6%, H→L+9 11.6%, H-9→L 7.7%,<br>H→L+10 7.6%, H-1→L+3 6.8%, H-1→L+4 6.2%                   |
| S <sub>25</sub> | 5.15                        | 241                              | 0.02 | H-5→L 16.5%, H-9→L 14.8%, H-4→L 7.4%,<br>H→L+8 6.8%, H→L+7 6.7%, H→L+9 6.1%,<br>H-2→L+1 5.7%       |

Table S15. Electronic excitation properties of various conformations of ETE-Pyc in toluene using MN15.

ETE-Pyc (conf1)

| Excited state   | $E_{\text{vert}}/\text{eV}$ | $\lambda_{\text{cal}}/\text{nm}$ | $f$  | assignment                                                                        |
|-----------------|-----------------------------|----------------------------------|------|-----------------------------------------------------------------------------------|
| S <sub>1</sub>  | 2.70                        | 459                              | 1.71 | H→L 68.9%, H-1→L 14.4%, H→L+1 11.8%                                               |
| S <sub>2</sub>  | 3.29                        | 377                              | 1.04 | H→L+1 47.6%, H→L 27.9%, H-1→L 12.6%                                               |
| S <sub>3</sub>  | 3.33                        | 372                              | 0.09 | H-1→L 51.1%, H→L+1 27.8%, H-5→L 9.7%                                              |
| S <sub>4</sub>  | 3.41                        | 363                              | 1.07 | H→L+3 87.6%, H-1→L+3 5.2%                                                         |
| S <sub>5</sub>  | 3.89                        | 319                              | 0.05 | H→L+5 82.9%                                                                       |
| S <sub>6</sub>  | 3.91                        | 317                              | 0.01 | H→L+2 53.7%, H-1→L+2 31.9%, H-5→L+2 7.4%                                          |
| S <sub>7</sub>  | 4.00                        | 310                              | 0.01 | H-2→L 96.9%                                                                       |
| S <sub>8</sub>  | 4.07                        | 305                              | 0.01 | H→L+4 41.5%, H-1→L+1 29.8%, H-2→L+3 7.0%,<br>H-5→L 6.5%                           |
| S <sub>9</sub>  | 4.09                        | 303                              | 0.19 | H-5→L 39.1%, H-6→L 22.2%, H-1→L 18.8%,<br>H→L+4 6.5%                              |
| S <sub>10</sub> | 4.13                        | 300                              | 0.00 | H-12→L 91.4%                                                                      |
| S <sub>11</sub> | 4.27                        | 291                              | 0.14 | H-1→L+1 53.3%, H→L+4 23.8%, H→L+1 5.1%                                            |
| S <sub>12</sub> | 4.40                        | 282                              | 0.00 | H-12→L+2 93.6%                                                                    |
| S <sub>13</sub> | 4.42                        | 280                              | 0.14 | H→L+9 39.1%, H-1→L+3 9.7%, H-2→L+1 8.0%,<br>H-2→L+4 5.7%, H-1→L+5 5.1%            |
| S <sub>14</sub> | 4.47                        | 278                              | 0.07 | H→L+8 55.4%, H-2→L+5 8.7%, H-3→L 6.0%                                             |
| S <sub>15</sub> | 4.47                        | 277                              | 0.01 | H-4→L 16.8%, H-3→L 15.4%, H→L+6 15.2%,<br>H-1→L+6 12.5%, H-2→L+3 7.5%, H-9→L 6.5% |
| S <sub>16</sub> | 4.48                        | 277                              | 0.00 | H-4→L 24.0%, H-3→L 17.0%, H-1→L+2 11.6%,<br>H→L+2 11.5%, H→L+6 5.9%, H→L+8 5.3%   |
| S <sub>17</sub> | 4.48                        | 277                              | 0.01 | H→L+2 30.6%, H-1→L+2 22.6%, H-4→L 11.1%,<br>H-5→L+2 7.3%                          |
| S <sub>18</sub> | 4.50                        | 276                              | 0.00 | H-3→L 49.4%, H-4→L 42.0%                                                          |
| S <sub>19</sub> | 4.51                        | 275                              | 0.10 | H-2→L+1 16.1%, H→L+9 15.4%, H-1→L+3 12.1%,<br>H-2→L+4 8.8%, H-2→L+3 7.2%          |
| S <sub>20</sub> | 4.52                        | 274                              | 0.07 | H-2→L+3 36.7%, H→L+4 10.9%, H→L+9 6.0%                                            |
| S <sub>21</sub> | 4.67                        | 265                              | 0.00 | H-15→L 76.9%, H-15→L+10 5.9%, H-15→L+12 5.5%                                      |
| S <sub>22</sub> | 4.69                        | 265                              | 0.18 | H-3→L+3 52.2%, H-4→L+4 23.3%, H-4→L+1 10.1%                                       |
| S <sub>23</sub> | 4.69                        | 264                              | 0.13 | H-4→L+3 44.8%, H-3→L+4 17.6%, H-6→L 8.2%,<br>H-3→L+1 7.5%, H-5→L 5.8%             |
| S <sub>24</sub> | 4.70                        | 264                              | 0.02 | H-6→L 30.7%, H-5→L 28.0%, H-11→L 11.2%,<br>H-4→L+3 10.6%                          |
| S <sub>25</sub> | 4.80                        | 258                              | 0.01 | H-2→L+1 53.8%, H-1→L+3 36.0%                                                      |

## ETE-Pyc (conf2)

| Excited state   | $E_{\text{vert}}/\text{eV}$ | $\lambda_{\text{cal}}/\text{nm}$ | $f$  | assignment                                                                           |
|-----------------|-----------------------------|----------------------------------|------|--------------------------------------------------------------------------------------|
| S <sub>1</sub>  | 2.69                        | 462                              | 1.34 | H→L 70.2%, H-1→L 15.0%, H→L+1 9.0%                                                   |
| S <sub>2</sub>  | 3.25                        | 382                              | 1.04 | H→L+1 50.4%, H→L 24.5%, H-1→L 9.2%                                                   |
| S <sub>3</sub>  | 3.30                        | 376                              | 0.16 | H-1→L 54.9%, H→L+1 21.2%, H-5→L 9.7%                                                 |
| S <sub>4</sub>  | 3.40                        | 365                              | 1.06 | H→L+3 87.3%                                                                          |
| S <sub>5</sub>  | 3.86                        | 321                              | 0.03 | H→L+5 46.0%, H→L+4 26.5%, H→L+2 7.8%,<br>H-1→L+1 5.7%                                |
| S <sub>6</sub>  | 3.89                        | 319                              | 0.01 | H→L+2 35.6%, H→L+5 21.7%, H-1→L+1 15.8%,<br>H-1→L+2 13.1%                            |
| S <sub>7</sub>  | 3.98                        | 311                              | 0.00 | H-2→L 97.8%                                                                          |
| S <sub>8</sub>  | 4.06                        | 306                              | 0.26 | H-5→L 44.0%, H-6→L 26.3%, H-1→L 18.2%                                                |
| S <sub>9</sub>  | 4.07                        | 305                              | 0.00 | H-12→L 83.4%, H-12→L+2 7.3%                                                          |
| S <sub>10</sub> | 4.11                        | 302                              | 0.09 | H→L+4 24.9%, H-1→L+1 21.3%, H-1→L+2 15.5%,<br>H→L+5 11.5%, H→L+2 10.5%, H-2→L+3 5.7% |
| S <sub>11</sub> | 4.22                        | 294                              | 0.17 | H-1→L+1 40.5%, H→L+4 23.8%, H→L+1 9.0%,<br>H→L+5 6.7%, H-2→L+3 5.0%                  |
| S <sub>12</sub> | 4.42                        | 280                              | 0.14 | H→L+9 38.5%, H-1→L+3 8.4%, H-2→L+1 8.0%,<br>H-2→L+4 5.2%                             |
| S <sub>13</sub> | 4.44                        | 279                              | 0.03 | H→L+8 50.6%, H-2→L+3 8.2%, H-2→L+5 6.4%                                              |
| S <sub>14</sub> | 4.46                        | 278                              | 0.01 | H-3→L 92.2%                                                                          |
| S <sub>15</sub> | 4.46                        | 278                              | 0.00 | H-12→L+2 67.5%, H-12→L+1 14.3%, H-12→L 8.8%                                          |
| S <sub>16</sub> | 4.48                        | 277                              | 0.04 | H→L+6 18.5%, H-1→L+6 17.5%, H-9→L 10.6%,<br>H→L+8 10.2%                              |
| S <sub>17</sub> | 4.49                        | 276                              | 0.01 | H-4→L 76.8%                                                                          |
| S <sub>18</sub> | 4.50                        | 276                              | 0.07 | H→L+9 19.2%, H-4→L 18.1%, H-2→L+1 13.5%,<br>H-1→L+3 11.5%, H-2→L+4 7.0%              |
| S <sub>19</sub> | 4.51                        | 275                              | 0.03 | H-1→L+2 34.5%, H→L+2 29.6%, H-5→L+2 6.9%,<br>H→L+4 6.1%                              |
| S <sub>20</sub> | 4.52                        | 274                              | 0.12 | H-2→L+3 41.2%, H→L+4 8.2%, H→L+6 7.6%,<br>H-1→L+6 7.1%, H-9→L 5.6%                   |
| S <sub>21</sub> | 4.67                        | 266                              | 0.00 | H-15→L 77.1%, H-15→L+10 6.4%                                                         |
| S <sub>22</sub> | 4.68                        | 265                              | 0.06 | H-6→L 32.8%, H-5→L 28.7%, H-11→L 12.7%,<br>H-4→L+3 5.6%                              |
| S <sub>23</sub> | 4.69                        | 264                              | 0.14 | H-3→L+3 47.9%, H-3→L+4 22.7%, H-3→L+1 8.1%                                           |
| S <sub>24</sub> | 4.69                        | 264                              | 0.13 | H-4→L+3 50.3%, H-4→L+4 18.2%, H-4→L+1 8.4%                                           |
| S <sub>25</sub> | 4.78                        | 259                              | 0.01 | H-2→L+1 50.0%, H-1→L+3 37.5%                                                         |



## ETE-Pyc (conf3)

| Excited state   | $E_{\text{vert}}/\text{eV}$ | $\lambda_{\text{cal}}/\text{nm}$ | $f$  | assignment                                                                                        |
|-----------------|-----------------------------|----------------------------------|------|---------------------------------------------------------------------------------------------------|
| S <sub>1</sub>  | 2.71                        | 458                              | 1.76 | H→L 68.4%, H-1→L 14.7%, H→L+1 12.0%                                                               |
| S <sub>2</sub>  | 3.29                        | 377                              | 1.05 | H→L+1 51.0%, H→L 27.4%, H-1→L 10.0%                                                               |
| S <sub>3</sub>  | 3.33                        | 372                              | 0.12 | H-1→L 53.7%, H→L+1 24.4%, H-5→L 9.8%                                                              |
| S <sub>4</sub>  | 3.39                        | 366                              | 1.00 | H→L+3 87.5%                                                                                       |
| S <sub>5</sub>  | 3.88                        | 320                              | 0.03 | H→L+5 84.3%                                                                                       |
| S <sub>6</sub>  | 3.91                        | 317                              | 0.01 | H→L+2 53.8%, H-1→L+2 33.0%, H-5→L+2 7.3%                                                          |
| S <sub>7</sub>  | 4.01                        | 309                              | 0.01 | H-2→L 96.8%                                                                                       |
| S <sub>8</sub>  | 4.05                        | 306                              | 0.01 | H→L+4 48.2%, H-1→L+1 29.5%, H-2→L+3 7.8%                                                          |
| S <sub>9</sub>  | 4.09                        | 303                              | 0.19 | H-5→L 42.5%, H-6→L 24.7%, H-1→L 18.1%                                                             |
| S <sub>10</sub> | 4.13                        | 300                              | 0.00 | H-12→L 91.5%                                                                                      |
| S <sub>11</sub> | 4.25                        | 292                              | 0.16 | H-1→L+1 54.0%, H→L+4 20.9%                                                                        |
| S <sub>12</sub> | 4.40                        | 280                              | 0.09 | H→L+8 38.3%, H-2→L+3 8.3%, H→L+9 7.0%,<br>H-2→L+1 5.4%                                            |
| S <sub>13</sub> | 4.43                        | 280                              | 0.03 | H→L+8 50.6%, H-2→L+3 8.2%, H-2→L+5 6.4%                                                           |
| S <sub>14</sub> | 4.45                        | 278                              | 0.13 | H→L+9 25.0%, H→L+8 10.0%, H-2→L+1 8.3%,<br>H-1→L+3 8.2%, H→L+7 7.5%, H-2→L+4 5.7%                 |
| S <sub>15</sub> | 4.48                        | 277                              | 0.05 | H→L+6 10.8%, H→L+9 10.3%, H-2→L+1 9.6%,<br>H-1→L+3 8.5%, H-1→L+6 8.3%, H-2→L+4 5.8%               |
| S <sub>16</sub> | 4.48                        | 277                              | 0.01 | H→L+2 36.6%, H-1→L+2 27.6%, H-5→L+2 9.1%,<br>H-2→L+3 5.6%                                         |
| S <sub>17</sub> | 4.49                        | 276                              | 0.03 | H→L+9 14.5%, H→L+8 9.3%, H-1→L+6 7.6%,<br>H→L+6 6.7%, H-2→L+1 6.5%, H-1→L+3 6.5%,<br>H-2→L+3 5.9% |
| S <sub>18</sub> | 4.50                        | 276                              | 0.01 | H-3→L 28.6%, H-4→L 27.9%, H-2→L+3 8.8%,<br>H→L+6 6.7%, H-1→L+6 6.4%                               |
| S <sub>19</sub> | 4.51                        | 275                              | 0.05 | H-4→L 34.7%, H-2→L+3 25.7%, H→L+6 5.5%                                                            |
| S <sub>20</sub> | 4.52                        | 274                              | 0.03 | H-3→L 56.7%, H-4→L 31.1%                                                                          |
| S <sub>21</sub> | 4.67                        | 265                              | 0.00 | H-15→L 76.9%, H-15→L+11 5.9%                                                                      |
| S <sub>22</sub> | 4.69                        | 265                              | 0.06 | H-3→L+3 35.8%, H-4→L+4 22.2%, H-4→L+3 15.3%,<br>H-4→L+1 11.3%                                     |
| S <sub>23</sub> | 4.69                        | 264                              | 0.15 | H-4→L+3 37.8%, H-3→L+4 20.8%, H-3→L+3 15.1%,<br>H-3→L+1 9.5%                                      |
| S <sub>24</sub> | 4.72                        | 263                              | 0.11 | H-6→L 37.2%, H-5→L 33.3%, H-11→L 13.7%                                                            |
| S <sub>25</sub> | 4.80                        | 259                              | 0.01 | H-2→L+1 51.0%, H-1→L+3 39.9%                                                                      |

## ETE-Pyc (conf6)

| Excited state   | $E_{\text{vert}}/\text{eV}$ | $\lambda_{\text{cal}}/\text{nm}$ | $f$  | assignment                                                                                                  |
|-----------------|-----------------------------|----------------------------------|------|-------------------------------------------------------------------------------------------------------------|
| S <sub>1</sub>  | 2.71                        | 458                              | 1.69 | H→L 68.6%, H-1→L 14.7%, H→L+1 11.6%                                                                         |
| S <sub>2</sub>  | 3.28                        | 378                              | 1.00 | H→L+1 55.4%, H→L 25.7%, H-1→L 6.9%                                                                          |
| S <sub>3</sub>  | 3.33                        | 372                              | 0.18 | H-1→L 56.9%, H→L+1 19.1%, H-5→L 10.5%,<br>H→L 5.3%                                                          |
| S <sub>4</sub>  | 3.40                        | 365                              | 0.98 | H→L+3 87.3%                                                                                                 |
| S <sub>5</sub>  | 3.89                        | 319                              | 0.03 | H→L+5 79.0%, H→L+4 5.7%                                                                                     |
| S <sub>6</sub>  | 3.90                        | 318                              | 0.01 | H→L+2 50.4%, H-1→L+2 28.7%, H-5→L+2 6.5%                                                                    |
| S <sub>7</sub>  | 4.01                        | 310                              | 0.01 | H-2→L 96.9%                                                                                                 |
| S <sub>8</sub>  | 4.05                        | 306                              | 0.03 | H→L+4 46.1%, H-1→L+1 27.9%, H-2→L+3 7.3%                                                                    |
| S <sub>9</sub>  | 4.09                        | 303                              | 0.21 | H-5→L 44.5%, H-6→L 25.0%, H-1→L 18.0%                                                                       |
| S <sub>10</sub> | 4.13                        | 300                              | 0.00 | H-12→L 91.5%                                                                                                |
| S <sub>11</sub> | 4.24                        | 292                              | 0.16 | H-1→L+1 51.5%, H→L+4 22.2%, H→L+1 5.0%                                                                      |
| S <sub>12</sub> | 4.40                        | 282                              | 0.00 | H-12→L+2 91.7%                                                                                              |
| S <sub>13</sub> | 4.43                        | 280                              | 0.09 | H→L+8 35.2%, H-2→L+3 9.5%, H→L+9 8.8%                                                                       |
| S <sub>14</sub> | 4.45                        | 279                              | 0.18 | H-1→L+3 14.7%, H-2→L+1 14.7%, H-2→L+3 12.2%,<br>H-2→L+4 9.2%, H→L+9 8.3%, H-5→L+3 6.5%                      |
| S <sub>15</sub> | 4.48                        | 277                              | 0.01 | H→L+9 33.8%, H→L+8 6.1%, H→L+7 5.2%,<br>H-2→L+3 5.0%                                                        |
| S <sub>16</sub> | 4.48                        | 276                              | 0.02 | H→L+2 24.6%, H-1→L+2 22.0%, H→L+8 13.7%,<br>H-5→L+2 8.5%                                                    |
| S <sub>17</sub> | 4.49                        | 276                              | 0.03 | H→L+2 13.3%, H-1→L+2 9.6%, H→L+9 8.4%,<br>H-1→L+6 7.6%, H-2→L+3 6.4%, H→L+6 6.1%,<br>H→L+8 5.6%, H-9→L 5.5% |
| S <sub>18</sub> | 4.51                        | 275                              | 0.01 | H-4→L 36.6%, H-3→L 23.2%, H→L+6 7.8%,<br>H-2→L+3 7.1%, H-1→L+6 6.6%                                         |
| S <sub>19</sub> | 4.51                        | 275                              | 0.01 | H-4→L 54.5%, H-3→L 30.7%                                                                                    |
| S <sub>20</sub> | 4.52                        | 275                              | 0.05 | H-3→L 39.2%, H-2→L+3 20.0%, H→L+6 7.6%,<br>H-1→L+6 6.3%                                                     |
| S <sub>21</sub> | 4.67                        | 265                              | 0.00 | H-15→L 77.0%, H-15→L+10 5.2%                                                                                |
| S <sub>22</sub> | 4.68                        | 265                              | 0.13 | H-4→L+3 49.0%, H-4→L+4 21.1%, H-4→L+1 10.3%,<br>H-3→L+3 6.4%                                                |
| S <sub>23</sub> | 4.69                        | 264                              | 0.11 | H-3→L+3 45.2%, H-3→L+4 24.8%, H-3→L+1 9.6%,<br>H-4→L+3 6.5%                                                 |
| S <sub>24</sub> | 4.71                        | 263                              | 0.07 | H-6→L 39.5%, H-5→L 33.5%, H-11→L 14.6%                                                                      |
| S <sub>25</sub> | 4.79                        | 259                              | 0.01 | H-2→L+1 52.0%, H-1→L+3 38.4%                                                                                |

## ETE-Pyc (conf7)

| Excited state   | $E_{\text{vert}}/\text{eV}$ | $\lambda_{\text{cal}}/\text{nm}$ | $f$  | assignment                                                                        |
|-----------------|-----------------------------|----------------------------------|------|-----------------------------------------------------------------------------------|
| S <sub>1</sub>  | 2.71                        | 458                              | 1.75 | H→L 68.4%, H-1→L 14.7%, H→L+1 11.9%                                               |
| S <sub>2</sub>  | 3.29                        | 377                              | 1.06 | H→L+1 48.5%, H→L 28.1%, H-1→L 11.6%                                               |
| S <sub>3</sub>  | 3.33                        | 372                              | 0.09 | H-1→L 52.0%, H→L+1 26.8%, H-5→L 9.7%                                              |
| S <sub>4</sub>  | 3.40                        | 364                              | 1.03 | H→L+3 87.4%                                                                       |
| S <sub>5</sub>  | 3.87                        | 321                              | 0.03 | H→L+5 64.6%, H→L+4 23.2%                                                          |
| S <sub>6</sub>  | 3.91                        | 317                              | 0.01 | H→L+2 53.9%, H-1→L+2 33.0%, H-5→L+2 7.5%                                          |
| S <sub>7</sub>  | 4.01                        | 309                              | 0.01 | H-2→L 97.2%                                                                       |
| S <sub>8</sub>  | 4.07                        | 304                              | 0.02 | H-1→L+1 29.7%, H→L+4 24.7%, H→L+5 13.4%,<br>H-5→L 11.1%, H-6→L 7.5%, H-2→L+3 5.5% |
| S <sub>9</sub>  | 4.09                        | 303                              | 0.18 | H-5→L 34.7%, H-6→L 19.3%, H-1→L 18.2%,<br>H→L+4 8.1%, H-1→L+1 5.1%                |
| S <sub>10</sub> | 4.13                        | 300                              | 0.00 | H-12→L 91.4%                                                                      |
| S <sub>11</sub> | 4.26                        | 291                              | 0.15 | H-1→L+1 49.3%, H→L+4 22.2%, H→L+5 5.2%,<br>H→L+1 5.1%                             |
| S <sub>12</sub> | 4.40                        | 282                              | 0.00 | H-12→L+2 93.7%                                                                    |
| S <sub>13</sub> | 4.43                        | 280                              | 0.16 | H→L+9 41.7%, H-2→L+1 8.5%, H-1→L+3 8.4%,<br>H-2→L+4 5.4%                          |
| S <sub>14</sub> | 4.44                        | 279                              | 0.03 | H→L+8 51.8%, H-2→L+3 8.5%, H-2→L+5 6.0%                                           |
| S <sub>15</sub> | 4.48                        | 277                              | 0.05 | H→L+6 17.3%, H-1→L+6 14.7%, H→L+8 8.9%,<br>H-9→L 7.6%, H-1→L+2 6.3%, H-2→L+3 5.3% |
| S <sub>16</sub> | 4.48                        | 277                              | 0.01 | H→L+2 38.1%, H-1→L+2 28.4%, H-5→L+2 9.4%                                          |
| S <sub>17</sub> | 4.50                        | 276                              | 0.08 | H→L+9 22.5%, H-2→L+1 14.9%, H-1→L+3 11.9%,<br>H-2→L+4 7.8%                        |
| S <sub>18</sub> | 4.50                        | 276                              | 0.01 | H-4→L 88.3%                                                                       |
| S <sub>19</sub> | 4.51                        | 275                              | 0.01 | H-3→L 42.3%, H-2→L+3 18.2%, H-4→L 6.7%                                            |
| S <sub>20</sub> | 4.51                        | 275                              | 0.06 | H-3→L 45.9%, H-2→L+3 24.6%                                                        |
| S <sub>21</sub> | 4.67                        | 265                              | 0.00 | H-15→L 76.9%, H-15→L+10 5.3%                                                      |
| S <sub>22</sub> | 4.69                        | 265                              | 0.10 | H-3→L+3 49.5%, H-3→L+4 22.7%, H-3→L+1 10.7%                                       |
| S <sub>23</sub> | 4.69                        | 264                              | 0.13 | H-4→L+3 51.9%, H-4→L+4 24.0%, H-4→L+1 10.6%                                       |
| S <sub>24</sub> | 4.71                        | 263                              | 0.10 | H-6→L 37.3%, H-5→L 33.1%, H-11→L 13.6%                                            |
| S <sub>25</sub> | 4.80                        | 258                              | 0.01 | H-2→L+1 52.0%, H-1→L+3 38.4%                                                      |

## ETE-Pyc (conf8)

| Excited state   | $E_{\text{vert}}/\text{eV}$ | $\lambda_{\text{cal}}/\text{nm}$ | $f$  | assignment                                                                                         |
|-----------------|-----------------------------|----------------------------------|------|----------------------------------------------------------------------------------------------------|
| S <sub>1</sub>  | 2.69                        | 462                              | 1.40 | H→L 70.1%, H-1→L 15.0%, H→L+1 9.0%                                                                 |
| S <sub>2</sub>  | 3.25                        | 382                              | 1.03 | H→L+1 52.7%, H→L 23.7%, H-1→L 7.6%                                                                 |
| S <sub>3</sub>  | 3.30                        | 376                              | 0.22 | H-1→L 56.2%, H→L+1 19.0%, H-5→L 10.0%,<br>H→L 5.7%                                                 |
| S <sub>4</sub>  | 3.40                        | 365                              | 1.00 | H→L+3 87.2%                                                                                        |
| S <sub>5</sub>  | 3.87                        | 320                              | 0.01 | H→L+2 30.0%, H→L+5 21.8%, H-1→L+1 16.0%,<br>H-1→L+2 9.3%, H→L+4 8.8%                               |
| S <sub>6</sub>  | 3.90                        | 318                              | 0.03 | H→L+5 65.6%, H→L+2 12.0%, H-1→L+1 5.8%                                                             |
| S <sub>7</sub>  | 3.98                        | 311                              | 0.00 | H-2→L 95.8%                                                                                        |
| S <sub>8</sub>  | 4.06                        | 306                              | 0.23 | H-5→L 41.4%, H-6→L 24.7%, H-1→L 18.0%                                                              |
| S <sub>9</sub>  | 4.07                        | 305                              | 0.00 | H-12→L 83.5%, H-12→L+2 7.3%                                                                        |
| S <sub>10</sub> | 4.08                        | 304                              | 0.09 | H→L+4 41.0%, H-1→L+2 15.2%, H-1→L+1 12.4%,<br>H→L+2 10.6%, H-2→L+3 6.4%                            |
| S <sub>11</sub> | 4.22                        | 294                              | 0.19 | H-1→L+1 48.9%, H→L+4 21.7%, H→L+1 8.7%                                                             |
| S <sub>12</sub> | 4.43                        | 280                              | 0.16 | H→L+8 22.9%, H→L+9 13.8%, H-2→L+1 12.3%,<br>H-1→L+3 11.7%, H-2→L+4 9.3%, H-5→L+3 5.8%              |
| S <sub>13</sub> | 4.45                        | 279                              | 0.12 | H→L+8 21.7%, H-2→L+3 20.3%, H-1→L+3 5.2%                                                           |
| S <sub>14</sub> | 4.46                        | 278                              | 0.00 | H-12→L+2 69.5%, H-12→L+1 14.5%, H-12→L 9.0%                                                        |
| S <sub>15</sub> | 4.47                        | 277                              | 0.01 | H→L+9 25.4%, H→L+8 13.5%, H-2→L+3 10.3%,<br>H→L+6 9.4%, H-1→L+6 6.0%                               |
| S <sub>16</sub> | 4.48                        | 277                              | 0.00 | H-4→L 88.8%, H-3→L 6.1%                                                                            |
| S <sub>17</sub> | 4.48                        | 277                              | 0.00 | H-3→L 85.6%, H-4→L 7.0%                                                                            |
| S <sub>18</sub> | 4.49                        | 276                              | 0.03 | H-1→L+6 11.5%, H→L+6 10.8%, H→L+9 9.8%,<br>H-9→L 6.9%, H-2→L+1 5.7%, H-1→L+2 5.6%,<br>H-1→L+3 5.1% |
| S <sub>19</sub> | 4.52                        | 274                              | 0.05 | H-1→L+2 31.6%, H→L+2 28.3%, H-5→L+2 7.1%                                                           |
| S <sub>20</sub> | 4.52                        | 274                              | 0.06 | H-2→L+3 31.9%, H→L+4 9.6%, H→L+8 6.9%,<br>H-2→L+1 6.2%                                             |
| S <sub>21</sub> | 4.67                        | 266                              | 0.00 | H-15→L 77.0%                                                                                       |
| S <sub>22</sub> | 4.68                        | 265                              | 0.12 | H-4→L+3 32.6%, H-6→L 16.7%, H-5→L 14.4%,<br>H-4→L+4 10.8%, H-11→L 6.4%, H-4→L+1 5.1%               |
| S <sub>23</sub> | 4.68                        | 265                              | 0.08 | H-4→L+3 23.5%, H-6→L 20.7%, H-5→L 19.0%,<br>H-4→L+4 9.6%, H-11→L 8.1%                              |
| S <sub>24</sub> | 4.70                        | 264                              | 0.14 | H-3→L+3 47.2%, H-3→L+4 24.5%, H-3→L+1 9.3%                                                         |
| S <sub>25</sub> | 4.78                        | 259                              | 0.01 | H-2→L+1 49.5%, H-1→L+3 38.2%                                                                       |

## ETE-Pyc (conf9)

| Excited state   | $E_{\text{vert}}/\text{eV}$ | $\lambda_{\text{cal}}/\text{nm}$ | $f$  | assignment                                                                        |
|-----------------|-----------------------------|----------------------------------|------|-----------------------------------------------------------------------------------|
| S <sub>1</sub>  | 2.69                        | 461                              | 1.42 | H→L 70.1%, H-1→L 15.0%, H→L+1 8.9%                                                |
| S <sub>2</sub>  | 3.25                        | 381                              | 1.06 | H→L+1 53.9%, H→L 23.2%, H-1→L 6.9%                                                |
| S <sub>3</sub>  | 3.31                        | 375                              | 0.16 | H-1→L 56.7%, H→L+1 17.9%, H-5→L 10.2%,<br>H→L 6.2%                                |
| S <sub>4</sub>  | 3.40                        | 365                              | 1.02 | H→L+3 87.0%                                                                       |
| S <sub>5</sub>  | 3.88                        | 320                              | 0.02 | H→L+5 35.2%, H→L+2 21.6%, H-1→L+1 11.9%,<br>H→L+4 11.6%, H-1→L+2 6.3%             |
| S <sub>6</sub>  | 3.89                        | 319                              | 0.02 | H→L+5 49.1%, H→L+2 21.2%, H-1→L+1 9.2%,<br>H-1→L+2 7.5%                           |
| S <sub>7</sub>  | 3.99                        | 311                              | 0.01 | H-2→L 97.9%                                                                       |
| S <sub>8</sub>  | 4.06                        | 306                              | 0.24 | H-5→L 42.4%, H-6→L 25.1%, H-1→L 18.7%                                             |
| S <sub>9</sub>  | 4.07                        | 305                              | 0.00 | H-12→L 83.1%, H-12→L+2 7.2%                                                       |
| S <sub>10</sub> | 4.09                        | 303                              | 0.08 | H→L+4 40.6%, H-1→L+2 14.9%, H-1→L+1 12.8%,<br>H→L+2 9.9%, H-2→L+3 6.7%            |
| S <sub>11</sub> | 4.22                        | 294                              | 0.19 | H-1→L+1 48.6%, H→L+4 20.5%, H→L+1 8.3%                                            |
| S <sub>12</sub> | 4.43                        | 280                              | 0.10 | H→L+8 27.1%, H-2→L+3 11.6%, H→L+9 7.1%,<br>H-2→L+1 6.9%, H-1→L+3 6.5%             |
| S <sub>13</sub> | 4.45                        | 278                              | 0.16 | H→L+9 16.5%, H→L+8 11.8%, H-1→L+3 9.1%,<br>H-2→L+1 8.6%, H→L+7 7.9%, H-2→L+4 6.8% |
| S <sub>14</sub> | 4.46                        | 278                              | 0.01 | H-12→L+2 68.9%, H-12→L+1 14.6%, H-12→L 8.9%                                       |
| S <sub>15</sub> | 4.47                        | 277                              | 0.01 | H-3→L 89.3%                                                                       |
| S <sub>16</sub> | 4.48                        | 277                              | 0.02 | H→L+9 18.2%, H→L+6 12.6%, H-1→L+6 9.2%,<br>H-9→L 6.3%, H-2→L+1 6.2%, H-1→L+3 5.6% |
| S <sub>17</sub> | 4.48                        | 277                              | 0.01 | H→L+8 17.3%, H→L+9 15.8%, H-1→L+6 7.1%,<br>H-2→L+3 6.0%, H→L+6 5.3%               |
| S <sub>18</sub> | 4.51                        | 275                              | 0.05 | H-4→L 35.6%, H-2→L+3 24.0%, H→L+4 7.5%,<br>H→L+6 5.9%, H-1→L+6 5.0%               |
| S <sub>19</sub> | 4.51                        | 275                              | 0.03 | H-4→L 57.4%, H-2→L+3 15.5%, H→L+4 5.2%                                            |
| S <sub>20</sub> | 4.53                        | 274                              | 0.06 | H-1→L+2 30.8%, H→L+2 27.2%, H-5→L+2 7.7%                                          |
| S <sub>21</sub> | 4.67                        | 266                              | 0.00 | H-15→L 77.1%                                                                      |
| S <sub>22</sub> | 4.68                        | 265                              | 0.05 | H-6→L 34.1%, H-5→L 30.0%, H-11→L 13.2%                                            |
| S <sub>23</sub> | 4.69                        | 265                              | 0.09 | H-4→L+3 36.4%, H-4→L+4 18.5%, H-3→L+3 16.2%,<br>H-4→L+1 8.7%                      |
| S <sub>24</sub> | 4.69                        | 264                              | 0.19 | H-3→L+3 31.7%, H-3→L+4 18.0%, H-4→L+3 15.7%,<br>H-3→L+1 6.8%, H-5→L 5.0%          |
| S <sub>25</sub> | 4.79                        | 259                              | 0.01 | H-2→L+1 50.3%, H-1→L+3 38.0%                                                      |

## ETE-Pyc (conf10)

| Excited state   | $E_{\text{vert}}/\text{eV}$ | $\lambda_{\text{cal}}/\text{nm}$ | $f$  | assignment                                                                                         |
|-----------------|-----------------------------|----------------------------------|------|----------------------------------------------------------------------------------------------------|
| S <sub>1</sub>  | 2.70                        | 459                              | 1.64 | H→L 69.2%, H-1→L 14.3%, H→L+1 11.5%                                                                |
| S <sub>2</sub>  | 3.27                        | 379                              | 1.00 | H→L+1 51.8%, H→L 26.5%, H-1→L 9.4%                                                                 |
| S <sub>3</sub>  | 3.33                        | 373                              | 0.13 | H-1→L 54.7%, H→L+1 22.7%, H-5→L 10.1%                                                              |
| S <sub>4</sub>  | 3.40                        | 364                              | 1.07 | H→L+3 87.7%                                                                                        |
| S <sub>5</sub>  | 3.89                        | 319                              | 0.05 | H→L+5 80.0%                                                                                        |
| S <sub>6</sub>  | 3.90                        | 318                              | 0.00 | H→L+2 51.0%, H-1→L+2 28.2%, H-5→L+2 6.5%                                                           |
| S <sub>7</sub>  | 4.00                        | 310                              | 0.01 | H-2→L 97.2%                                                                                        |
| S <sub>8</sub>  | 4.05                        | 306                              | 0.03 | H→L+4 44.3%, H-1→L+1 29.2%, H-2→L+3 7.2%                                                           |
| S <sub>9</sub>  | 4.08                        | 304                              | 0.21 | H-5→L 44.3%, H-6→L 24.6%, H-1→L 18.4%                                                              |
| S <sub>10</sub> | 4.14                        | 300                              | 0.00 | H-12→L 91.5%                                                                                       |
| S <sub>11</sub> | 4.25                        | 292                              | 0.14 | H-1→L+1 51.5%, H→L+4 24.5%, H→L+1 5.9%                                                             |
| S <sub>12</sub> | 4.40                        | 282                              | 0.00 | H-12→L+2 91.5%                                                                                     |
| S <sub>13</sub> | 4.42                        | 281                              | 0.15 | H→L+9 36.7%, H-1→L+3 11.3%, H-2→L+1 9.3%,<br>H-2→L+4 6.3%, H-5→L+3 5.2%                            |
| S <sub>14</sub> | 4.46                        | 278                              | 0.09 | H→L+8 50.8%, H-2→L+3 11.5%, H-2→L+5 7.7%                                                           |
| S <sub>15</sub> | 4.47                        | 278                              | 0.01 | H→L+2 19.2%, H-1→L+2 18.1%, H→L+8 9.7%,<br>H-5→L+2 7.9%, H→L+6 7.1%, H-2→L+3 7.0%,<br>H-1→L+6 5.0% |
| S <sub>16</sub> | 4.48                        | 277                              | 0.00 | H→L+2 20.6%, H-1→L+2 16.1%, H-2→L+3 10.5%,<br>H→L+6 8.8%, H-1→L+6 8.4%, H-9→L 5.9%                 |
| S <sub>17</sub> | 4.48                        | 277                              | 0.00 | H-3→L 66.1%, H-4→L 23.9%                                                                           |
| S <sub>18</sub> | 4.49                        | 276                              | 0.00 | H-4→L 72.1%, H-3→L 21.9%                                                                           |
| S <sub>19</sub> | 4.50                        | 275                              | 0.08 | H→L+9 23.6%, H-2→L+1 19.0%, H-1→L+3 14.2%,<br>H-2→L+4 10.5%, H-5→L+3 5.5%                          |
| S <sub>20</sub> | 4.52                        | 274                              | 0.06 | H-2→L+3 32.3%, H→L+6 14.1%, H-1→L+6 12.2%,<br>H→L+4 9.3%, H-9→L 7.9%                               |
| S <sub>21</sub> | 4.67                        | 265                              | 0.00 | H-15→L 77.0%, H-15→L+10 6.2%                                                                       |
| S <sub>22</sub> | 4.68                        | 265                              | 0.17 | H-3→L+3 44.9%, H-4→L+4 23.2%, H-4→L+1 10.1%,<br>H-4→L+3 8.8%                                       |
| S <sub>23</sub> | 4.69                        | 264                              | 0.11 | H-4→L+3 43.4%, H-3→L+4 21.3%, H-3→L+1 8.8%,<br>H-3→L+3 7.9%                                        |
| S <sub>24</sub> | 4.70                        | 264                              | 0.03 | H-6→L 37.3%, H-5→L 31.5%, H-11→L 13.6%                                                             |
| S <sub>25</sub> | 4.79                        | 259                              | 0.01 | H-2→L+1 53.0%, H-1→L+3 36.2%                                                                       |

Table S16. Electronic excitation properties of various conformations of TEBT-Pyc in toluene using MN15.

TEBT-Pyc (conf1)

| Excited state   | $E_{\text{vert}}/\text{eV}$ | $\lambda_{\text{cal}}/\text{nm}$ | $f$  | assignment                                                                        |
|-----------------|-----------------------------|----------------------------------|------|-----------------------------------------------------------------------------------|
| S <sub>1</sub>  | 2.53                        | 490                              | 1.84 | H→L 68.8%, H-1→L 13.6%, H→L+1 12.4%                                               |
| S <sub>2</sub>  | 3.21                        | 386                              | 0.45 | H→L+1 71.9%, H→L 9.4%                                                             |
| S <sub>3</sub>  | 3.28                        | 378                              | 0.30 | H-1→L 61.0%, H→L 20.3%, H-2→L 6.8%,<br>H-1→L+1 5.3%                               |
| S <sub>4</sub>  | 3.64                        | 341                              | 0.48 | H→L+3 72.2%, H-1→L+3 9.2%, H-1→L+1 6.6%                                           |
| S <sub>5</sub>  | 3.81                        | 325                              | 0.01 | H→L+2 62.1%, H-1→L+2 27.6%                                                        |
| S <sub>6</sub>  | 3.92                        | 316                              | 0.08 | H→L+4 35.1%, H-1→L+1 28.5%, H→L+5 15.9%                                           |
| S <sub>7</sub>  | 3.97                        | 312                              | 0.05 | H→L+5 61.0%, H-1→L+1 20.2%                                                        |
| S <sub>8</sub>  | 3.99                        | 310                              | 0.26 | H-2→L 39.6%, H-4→L 32.1%, H-1→L 13.6%                                             |
| S <sub>9</sub>  | 4.11                        | 302                              | 0.00 | H-11→L 90.4%                                                                      |
| S <sub>10</sub> | 4.13                        | 300                              | 0.10 | H→L+4 42.5%, H-1→L+1 21.4%, H-1→L+4 7.0%,<br>H→L+5 6.8%, H→L+1 6.3%, H→L+3 5.7%   |
| S <sub>11</sub> | 4.33                        | 286                              | 0.13 | H-2→L 39.5%, H-4→L 29.3%, H-8→L 11.3%                                             |
| S <sub>12</sub> | 4.41                        | 281                              | 0.00 | H-11→L+2 94.3%                                                                    |
| S <sub>13</sub> | 4.44                        | 279                              | 0.00 | H-3→L 94.2%                                                                       |
| S <sub>14</sub> | 4.45                        | 279                              | 0.03 | H→L+8 24.7%, H→L+6 15.3%, H→L+9 10.4%,<br>H→L+7 6.5%, H-1→L+5 6.1%, H-1→L+3 5.3%  |
| S <sub>15</sub> | 4.50                        | 275                              | 0.06 | H-1→L+3 30.6%, H-2→L+3 21.6%, H→L+8 12.4%,<br>H→L+6 5.4%                          |
| S <sub>16</sub> | 4.55                        | 272                              | 0.14 | H-7→L 40.9%, H-7→L+1 15.3%, H→L+10 5.6%                                           |
| S <sub>17</sub> | 4.59                        | 270                              | 0.03 | H-1→L+2 41.8%, H→L+2 35.1%, H-4→L+2 8.6%,<br>H-2→L+2 7.8%                         |
| S <sub>18</sub> | 4.63                        | 268                              | 0.02 | H→L+9 30.1%, H→L+8 26.3%, H→L+6 5.8%,<br>H-1→L+8 5.3%                             |
| S <sub>19</sub> | 4.66                        | 266                              | 0.00 | H-14→L 72.9%, H-14→L+11 9.5%, H-14→L+1 8.0%,<br>H-14→L+7 5.3%                     |
| S <sub>20</sub> | 4.69                        | 264                              | 0.08 | H-3→L+3 47.1%, H→L+6 8.3%, H-1→L+4 7.2%,<br>H-7→L 5.9%, H-3→L+1 5.0%              |
| S <sub>21</sub> | 4.70                        | 264                              | 0.10 | H-3→L+3 29.7%, H→L+6 16.2%, H-1→L+4 13.6%,<br>H-7→L 9.5%                          |
| S <sub>22</sub> | 4.76                        | 260                              | 0.08 | H-2→L+1 41.2%, H-4→L+1 13.9%, H-8→L 9.1%,<br>H-4→L 6.3%                           |
| S <sub>23</sub> | 4.90                        | 253                              | 0.01 | H-1→L+3 19.3%, H→L+6 16.1%, H-2→L+1 12.3%,<br>H-8→L 6.9%, H-1→L+4 5.2%            |
| S <sub>24</sub> | 4.94                        | 251                              | 0.01 | H-6→L 30.7%, H-1→L+4 13.2%, H-4→L 8.0%,<br>H-8→L 7.4%, H-2→L+1 7.4%, H-6→L+1 6.7% |
| S <sub>25</sub> | 5.03                        | 246                              | 0.06 | H-5→L 18.0%, H-6→L 15.8%, H-8→L 14.2%,<br>H→L+9 8.9%, H-6→L+1 5.7%                |

## TEBT-Pyc (conf3)

| Excited state   | $E_{\text{vert}}/\text{eV}$ | $\lambda_{\text{cal}}/\text{nm}$ | $f$  | assignment                                                                         |
|-----------------|-----------------------------|----------------------------------|------|------------------------------------------------------------------------------------|
| S <sub>1</sub>  | 2.51                        | 494                              | 1.63 | H→L 69.1%, H-1→L 14.3%, H→L+1 11.2%                                                |
| S <sub>2</sub>  | 3.16                        | 392                              | 0.47 | H→L+1 73.1%, H→L 9.2%                                                              |
| S <sub>3</sub>  | 3.26                        | 381                              | 0.20 | H-1→L 62.1%, H→L 20.0%, H-2→L 6.6%                                                 |
| S <sub>4</sub>  | 3.63                        | 342                              | 0.64 | H→L+3 67.8%, H-1→L+1 9.1%, H-1→L+3 8.6%                                            |
| S <sub>5</sub>  | 3.82                        | 324                              | 0.10 | H→L+2 40.8%, H-1→L+2 17.1%, H-1→L+1 12.6%,<br>H→L+4 10.1%, H→L+3 5.2%              |
| S <sub>6</sub>  | 3.92                        | 316                              | 0.02 | H→L+4 24.4%, H-1→L+1 18.8%, H→L+5 16.4%,<br>H→L+2 15.5%, H-1→L+2 7.9%              |
| S <sub>7</sub>  | 3.96                        | 313                              | 0.05 | H→L+5 52.0%, H-1→L+1 14.1%, H-2→L 6.0%                                             |
| S <sub>8</sub>  | 3.98                        | 312                              | 0.32 | H-4→L 31.2%, H-2→L 31.2%, H-1→L 9.2%,<br>H-1→L+1 5.8%, H→L+5 5.3%                  |
| S <sub>9</sub>  | 4.06                        | 306                              | 0.00 | H-11→L 84.1%, H-11→L+2 6.6%                                                        |
| S <sub>10</sub> | 4.11                        | 302                              | 0.17 | H→L+4 44.0%, H-1→L+1 18.1%, H→L+5 9.0%,<br>H-1→L+4 6.3%, H→L+1 6.3%, H→L+3 5.7%    |
| S <sub>11</sub> | 4.32                        | 287                              | 0.09 | H-2→L 43.0%, H-4→L 27.5%, H-8→L 12.2%                                              |
| S <sub>12</sub> | 4.43                        | 280                              | 0.00 | H-3→L 92.9%                                                                        |
| S <sub>13</sub> | 4.45                        | 278                              | 0.00 | H-11→L+2 81.2%, H-11→L 7.8%, H-11→L+1 5.2%                                         |
| S <sub>14</sub> | 4.47                        | 277                              | 0.03 | H→L+9 24.9%, H→L+6 21.0%, H→L+7 8.0%,<br>H-1→L+5 6.2%                              |
| S <sub>15</sub> | 4.49                        | 276                              | 0.16 | H-1→L+3 27.3%, H→L+9 15.6%, H-2→L+3 13.9%                                          |
| S <sub>16</sub> | 4.54                        | 273                              | 0.02 | H-7→L 34.2%, H-7→L+1 12.9%, H-2→L+3 8.5%,<br>H→L+8 6.9%, H→L+10 5.1%, H-1→L+4 5.0% |
| S <sub>17</sub> | 4.60                        | 270                              | 0.03 | H→L+8 20.7%, H-1→L+2 18.7%, H→L+2 15.4%,<br>H-7→L 8.3%                             |
| S <sub>18</sub> | 4.62                        | 268                              | 0.01 | H→L+8 28.3%, H-1→L+2 18.9%, H→L+2 16.2%,<br>H→L+9 5.2%                             |
| S <sub>19</sub> | 4.66                        | 266                              | 0.00 | H-14→L 73.6%, H-14→L+11 9.4%, H-14→L+1 6.2%,<br>H-14→L+7 5.1%                      |
| S <sub>20</sub> | 4.69                        | 264                              | 0.06 | H-3→L+3 32.9%, H→L+6 14.3%, H-1→L+4 7.8%,<br>H-2→L+3 7.5%, H-7→L 6.5%              |
| S <sub>21</sub> | 4.71                        | 263                              | 0.13 | H-3→L+3 39.3%, H→L+6 12.2%, H-1→L+4 9.0%,<br>H-3→L+1 7.1%, H-7→L 5.0%              |
| S <sub>22</sub> | 4.74                        | 261                              | 0.04 | H-2→L+1 36.3%, H-4→L+1 13.5%, H-8→L 7.6%,<br>H-4→L 5.8%                            |
| S <sub>23</sub> | 4.88                        | 254                              | 0.01 | H-1→L+3 17.5%, H→L+6 16.6%, H-2→L+1 10.9%,<br>H-8→L 8.4%, H-1→L+4 5.3%             |
| S <sub>24</sub> | 4.95                        | 250                              | 0.00 | H-6→L 25.1%, H-1→L+4 11.0%, H-4→L 8.9%,<br>H-8→L 8.1%, H→L+9 6.4%, H-6→L+1 5.0%    |
| S <sub>25</sub> | 4.99                        | 248                              | 0.04 | H-6→L 24.5%, H-5→L 13.6%, H-8→L 11.4%,<br>H-1→L+4 8.1%, H-6→L+1 7.5%               |



## TEBT-Pyc (conf4)

| Excited state   | $E_{\text{vert}}/\text{eV}$ | $\lambda_{\text{cal}}/\text{nm}$ | $f$  | assignment                                                                        |
|-----------------|-----------------------------|----------------------------------|------|-----------------------------------------------------------------------------------|
| S <sub>1</sub>  | 2.53                        | 491                              | 1.82 | H→L 68.6%, H-1→L 13.8%, H→L+1 12.4%                                               |
| S <sub>2</sub>  | 3.21                        | 387                              | 0.44 | H→L+1 71.6%, H→L 9.5%                                                             |
| S <sub>3</sub>  | 3.27                        | 379                              | 0.31 | H-1→L 61.2%, H→L 20.4%, H-2→L 6.3%,<br>H-1→L+1 5.3%                               |
| S <sub>4</sub>  | 3.64                        | 341                              | 0.49 | H→L+3 72.1%, H-1→L+3 8.6%, H-1→L+1 7.0%                                           |
| S <sub>5</sub>  | 3.81                        | 325                              | 0.01 | H→L+2 61.7%, H-1→L+2 28.0%                                                        |
| S <sub>6</sub>  | 3.92                        | 316                              | 0.11 | H-1→L+1 35.3%, H→L+4 32.7%, H→L+5 9.4%,<br>H-2→L+1 5.6%                           |
| S <sub>7</sub>  | 3.96                        | 313                              | 0.04 | H→L+5 68.6%, H-1→L+1 14.3%                                                        |
| S <sub>8</sub>  | 3.99                        | 311                              | 0.26 | H-2→L 37.5%, H-4→L 31.7%, H-1→L 13.2%                                             |
| S <sub>9</sub>  | 4.11                        | 301                              | 0.00 | H-11→L 90.4%                                                                      |
| S <sub>10</sub> | 4.13                        | 300                              | 0.11 | H→L+4 44.5%, H-1→L+1 20.3%, H-1→L+4 7.0%,<br>H→L+1 6.4%, H→L+3 5.8%, H→L+5 5.5%   |
| S <sub>11</sub> | 4.33                        | 287                              | 0.12 | H-2→L 40.1%, H-4→L 28.5%, H-8→L 10.9%                                             |
| S <sub>12</sub> | 4.41                        | 281                              | 0.00 | H-11→L+2 94.2%                                                                    |
| S <sub>13</sub> | 4.41                        | 281                              | 0.02 | H→L+6 32.0%, H→L+9 10.8%, H-1→L+3 8.6%,<br>H→L+7 5.5%, H-3→L 5.3%                 |
| S <sub>14</sub> | 4.43                        | 280                              | 0.02 | H-3→L 86.7%                                                                       |
| S <sub>15</sub> | 4.54                        | 273                              | 0.07 | H-1→L+3 29.1%, H-2→L+3 21.8%, H→L+9 11.6%,<br>H-2→L+1 5.4%                        |
| S <sub>16</sub> | 4.55                        | 272                              | 0.12 | H-7→L 40.7%, H-7→L+1 15.2%, H→L+10 5.1%                                           |
| S <sub>17</sub> | 4.58                        | 271                              | 0.03 | H-1→L+2 41.4%, H→L+2 34.7%, H-4→L+2 8.2%,<br>H-2→L+2 7.1%                         |
| S <sub>18</sub> | 4.63                        | 268                              | 0.03 | H→L+8 52.7%, H→L+9 14.6%, H-1→L+8 5.5%                                            |
| S <sub>19</sub> | 4.66                        | 266                              | 0.00 | H-14→L 72.8%, H-14→L+11 9.5%, H-14→L+1 8.0%,<br>H-14→L+7 5.3%                     |
| S <sub>20</sub> | 4.69                        | 264                              | 0.10 | H-3→L+3 52.8%, H-2→L+3 6.9%, H-3→L+1 5.7%                                         |
| S <sub>21</sub> | 4.71                        | 263                              | 0.07 | H-3→L+3 20.9%, H-1→L+4 17.9%, H→L+6 14.6%,<br>H-7→L 11.0%                         |
| S <sub>22</sub> | 4.76                        | 261                              | 0.09 | H-2→L+1 38.5%, H-4→L+1 14.3%, H-8→L 9.1%,<br>H-4→L 6.5%                           |
| S <sub>23</sub> | 4.90                        | 253                              | 0.01 | H-1→L+3 20.1%, H→L+6 17.6%, H-2→L+1 10.2%,<br>H-1→L+4 6.2%                        |
| S <sub>24</sub> | 4.93                        | 252                              | 0.01 | H-6→L 30.3%, H-1→L+4 11.5%, H-8→L 9.4%,<br>H-2→L+1 8.9%, H-4→L 8.8%, H-6→L+1 6.2% |
| S <sub>25</sub> | 5.03                        | 246                              | 0.05 | H-5→L 17.5%, H-6→L 16.1%, H-8→L 13.8%,<br>H→L+9 9.4%, H-6→L+1 5.8%                |

## TEBT-Pyc (conf5)

| Excited state   | $E_{\text{vert}}/\text{eV}$ | $\lambda_{\text{cal}}/\text{nm}$ | $f$  | assignment                                                                                       |
|-----------------|-----------------------------|----------------------------------|------|--------------------------------------------------------------------------------------------------|
| S <sub>1</sub>  | 2.54                        | 488                              | 1.83 | H→L 70.1%, H-1→L 13.5%, H→L+1 11.1%                                                              |
| S <sub>2</sub>  | 3.24                        | 383                              | 0.44 | H→L+1 71.9%, H→L 10.2%, H→L+3 5.2%                                                               |
| S <sub>3</sub>  | 3.27                        | 379                              | 0.34 | H-1→L 63.2%, H→L 18.4%, H-2→L 6.9%                                                               |
| S <sub>4</sub>  | 3.63                        | 341                              | 0.53 | H→L+3 72.8%, H-1→L+3 7.8%, H-1→L+1 6.1%                                                          |
| S <sub>5</sub>  | 3.82                        | 324                              | 0.01 | H→L+2 62.1%, H-1→L+2 27.1%                                                                       |
| S <sub>6</sub>  | 3.92                        | 317                              | 0.07 | H→L+4 42.6%, H→L+5 22.8%, H-1→L+1 18.7%                                                          |
| S <sub>7</sub>  | 3.97                        | 312                              | 0.01 | H→L+5 44.1%, H-1→L+1 14.4%, H-2→L 10.6%,<br>H-1→L 7.4%                                           |
| S <sub>8</sub>  | 3.98                        | 311                              | 0.31 | H-4→L 28.1%, H-2→L 28.0%, H→L+5 12.0%,<br>H-1→L 8.8%, H-1→L+1 6.2%                               |
| S <sub>9</sub>  | 4.11                        | 301                              | 0.00 | H-11→L 90.7%                                                                                     |
| S <sub>10</sub> | 4.15                        | 299                              | 0.12 | H-1→L+1 33.9%, H→L+4 32.7%, H→L+1 7.6%,<br>H→L+3 5.7%, H→L+5 5.3%                                |
| S <sub>11</sub> | 4.34                        | 286                              | 0.13 | H-2→L 42.4%, H-4→L 28.6%, H-8→L 7.3%,<br>H-7→L 5.0%                                              |
| S <sub>12</sub> | 4.41                        | 281                              | 0.00 | H-11→L+2 94.5%                                                                                   |
| S <sub>13</sub> | 4.42                        | 281                              | 0.00 | H-3→L 92.7%                                                                                      |
| S <sub>14</sub> | 4.47                        | 277                              | 0.03 | H→L+9 31.9%, H→L+7 17.7%, H→L+6 12.0%,<br>H-1→L+5 8.1%                                           |
| S <sub>15</sub> | 4.50                        | 276                              | 0.09 | H-1→L+3 39.0%, H-2→L+3 22.1%, H→L+9 8.5%,<br>H→L+6 5.8%, H-2→L+1 5.7%                            |
| S <sub>16</sub> | 4.57                        | 271                              | 0.02 | H-1→L+2 34.4%, H→L+2 31.3%, H-7→L 8.0%,<br>H-4→L+2 7.2%, H-2→L+2 6.3%                            |
| S <sub>17</sub> | 4.59                        | 270                              | 0.09 | H-7→L 30.0%, H-7→L+1 11.3%, H-8→L 10.2%,<br>H-1→L+2 8.0%, H→L+8 5.4%, H→L+10 5.2%,<br>H→L+2 5.2% |
| S <sub>18</sub> | 4.61                        | 269                              | 0.03 | H→L+8 50.5%, H→L+7 7.7%                                                                          |
| S <sub>19</sub> | 4.66                        | 266                              | 0.00 | H-14→L 73.1%, H-14→L+11 8.6%, H-14→L+1 7.9%                                                      |
| S <sub>20</sub> | 4.69                        | 264                              | 0.06 | H-3→L+3 55.1%, H-2→L+3 8.5%, H→L+6 7.4%,<br>H-3→L+1 6.0%                                         |
| S <sub>21</sub> | 4.73                        | 262                              | 0.14 | H→L+6 23.0%, H-1→L+4 20.1%, H-3→L+3 19.7%,<br>H→L+9 5.3%                                         |
| S <sub>22</sub> | 4.78                        | 260                              | 0.05 | H-2→L+1 33.3%, H-4→L+1 15.5%, H-8→L 8.5%,<br>H-4→L 7.4%                                          |
| S <sub>23</sub> | 4.90                        | 253                              | 0.02 | H-1→L+3 19.3%, H-2→L+1 16.4%, H→L+6 13.0%,<br>H-1→L+4 5.7%                                       |
| S <sub>24</sub> | 4.96                        | 250                              | 0.02 | H-6→L 21.8%, H-5→L 9.9%, H→L+9 8.3%,<br>H-1→L+4 7.8%, H-4→L 7.3%                                 |
| S <sub>25</sub> | 5.00                        | 248                              | 0.02 | H-5→L 30.8%, H-8→L 11.6%, H-1→L+4 8.3%,<br>H-2→L+1 8.1%, H-7→L 6.4%                              |

## TEBT-Pyc (conf8)

| Excited state   | $E_{\text{vert}}/\text{eV}$ | $\lambda_{\text{cal}}/\text{nm}$ | $f$  | assignment                                                                                        |
|-----------------|-----------------------------|----------------------------------|------|---------------------------------------------------------------------------------------------------|
| S <sub>1</sub>  | 2.51                        | 494                              | 1.61 | H→L 69.2%, H-1→L 14.2%, H→L+1 11.2%                                                               |
| S <sub>2</sub>  | 3.16                        | 392                              | 0.46 | H→L+1 73.1%, H→L 9.4%                                                                             |
| S <sub>3</sub>  | 3.25                        | 381                              | 0.21 | H-1→L 62.2%, H→L 19.8%, H-2→L 7.0%                                                                |
| S <sub>4</sub>  | 3.62                        | 342                              | 0.65 | H→L+3 68.8%, H-1→L+3 8.9%, H-1→L+1 8.3%                                                           |
| S <sub>5</sub>  | 3.82                        | 325                              | 0.08 | H→L+2 40.0%, H-1→L+2 16.4%, H-1→L+1 13.7%,<br>H→L+4 10.9%                                         |
| S <sub>6</sub>  | 3.92                        | 317                              | 0.02 | H→L+4 24.4%, H-1→L+1 21.3%, H→L+2 17.9%,<br>H→L+5 10.0%, H-1→L+2 9.2%                             |
| S <sub>7</sub>  | 3.97                        | 313                              | 0.33 | H-2→L 30.6%, H-4→L 21.0%, H→L+5 18.4%,<br>H-1→L 12.3%                                             |
| S <sub>8</sub>  | 3.98                        | 312                              | 0.06 | H→L+5 42.4%, H-1→L+1 16.3%, H-4→L 11.2%,<br>H-2→L 8.4%                                            |
| S <sub>9</sub>  | 4.06                        | 306                              | 0.00 | H-11→L 84.1%, H-11→L+2 6.6%                                                                       |
| S <sub>10</sub> | 4.11                        | 302                              | 0.19 | H→L+4 42.9%, H-1→L+1 17.6%, H→L+5 11.4%,<br>H-1→L+4 6.5%, H→L+1 6.2%, H→L+3 5.0%                  |
| S <sub>11</sub> | 4.31                        | 287                              | 0.09 | H-2→L 40.5%, H-4→L 28.3%, H-8→L 12.5%                                                             |
| S <sub>12</sub> | 4.42                        | 280                              | 0.01 | H-3→L 94.0%                                                                                       |
| S <sub>13</sub> | 4.45                        | 279                              | 0.10 | H→L+8 21.6%, H-1→L+3 18.2%, H→L+9 13.6%,<br>H-2→L+3 9.2%, H-1→L+5 5.3%, H→L+6 5.1%                |
| S <sub>14</sub> | 4.45                        | 278                              | 0.00 | H-11→L+2 81.1%, H-11→L 7.7%, H-11→L+1 5.2%                                                        |
| S <sub>15</sub> | 4.50                        | 276                              | 0.06 | H→L+6 15.0%, H→L+8 13.6%, H-1→L+3 11.7%,<br>H→L+9 8.6%, H-1→L+4 5.8%, H-7→L 5.5%,<br>H-2→L+3 5.1% |
| S <sub>16</sub> | 4.54                        | 273                              | 0.02 | H-7→L 31.6%, H-7→L+1 11.8%, H-2→L+3 10.2%,<br>H-1→L+3 7.8%, H→L+10 5.4%                           |
| S <sub>17</sub> | 4.60                        | 269                              | 0.04 | H-1→L+2 24.4%, H→L+2 20.7%, H→L+8 7.6%,<br>H-7→L 7.1%, H→L+9 6.1%, H-2→L+2 5.6%                   |
| S <sub>18</sub> | 4.62                        | 269                              | 0.05 | H→L+9 24.2%, H→L+8 13.4%, H-1→L+2 13.1%,<br>H→L+2 10.9%, H→L+6 6.1%                               |
| S <sub>19</sub> | 4.66                        | 266                              | 0.00 | H-14→L 73.6%, H-14→L+11 9.4%, H-14→L+1 6.2%,<br>H-14→L+7 5.4%                                     |
| S <sub>20</sub> | 4.69                        | 264                              | 0.10 | H-3→L+3 54.4%, H→L+6 5.9%, H-3→L+1 5.7%                                                           |
| S <sub>21</sub> | 4.70                        | 264                              | 0.10 | H-3→L+3 21.7%, H→L+6 16.9%, H-1→L+4 12.8%,<br>H-7→L 8.2%, H→L+9 6.6%                              |
| S <sub>22</sub> | 4.74                        | 262                              | 0.04 | H-2→L+1 40.3%, H-4→L+1 12.8%, H-8→L 6.7%,<br>H-4→L 5.4%                                           |
| S <sub>23</sub> | 4.88                        | 254                              | 0.01 | H-1→L+3 16.9%, H→L+6 16.7%, H-2→L+1 10.7%,<br>H-8→L 8.6%, H-1→L+4 5.6%                            |
| S <sub>24</sub> | 4.95                        | 251                              | 0.01 | H-6→L 25.4%, H-1→L+4 10.3%, H-4→L 9.1%,<br>H-8→L 7.9%, H→L+9 6.6%                                 |
| S <sub>25</sub> | 4.99                        | 249                              | 0.04 | H-6→L 22.7%, H-5→L 14.7%, H-8→L 11.6%,<br>H-1→L+4 8.9%, H-6→L+1 7.1%                              |

## TEBT-Pyc (conf9)

| Excited state   | $E_{\text{vert}}/\text{eV}$ | $\lambda_{\text{cal}}/\text{nm}$ | $f$  | assignment                                                                        |
|-----------------|-----------------------------|----------------------------------|------|-----------------------------------------------------------------------------------|
| S <sub>1</sub>  | 2.51                        | 494                              | 1.58 | H→L 69.0%, H-1→L 14.3%, H→L+1 11.2%                                               |
| S <sub>2</sub>  | 3.16                        | 392                              | 0.62 | H→L+1 72.9%, H→L 9.8%                                                             |
| S <sub>3</sub>  | 3.25                        | 382                              | 0.28 | H-1→L 62.9%, H→L 19.5%, H-2→L 6.7%                                                |
| S <sub>4</sub>  | 3.61                        | 343                              | 0.46 | H→L+3 68.5%, H-1→L+1 8.9%, H-1→L+3 8.7%                                           |
| S <sub>5</sub>  | 3.82                        | 324                              | 0.02 | H→L+2 40.9%, H-1→L+2 17.3%, H-1→L+1 13.0%,<br>H→L+4 9.5%, H→L+3 5.2%              |
| S <sub>6</sub>  | 3.92                        | 317                              | 0.05 | H→L+4 22.2%, H-1→L+1 18.1%, H→L+5 15.0%,<br>H→L+2 14.9%, H-1→L+2 7.5%, H-1→L 5.1% |
| S <sub>7</sub>  | 3.95                        | 314                              | 0.02 | H→L+5 58.9%, H-1→L+1 14.9%                                                        |
| S <sub>8</sub>  | 3.97                        | 312                              | 0.38 | H-2→L 34.0%, H-4→L 30.4%, H-1→L 9.2%,<br>H-1→L+1 5.9%                             |
| S <sub>9</sub>  | 4.06                        | 305                              | 0.00 | H-11→L 84.1%, H-11→L+2 6.7%                                                       |
| S <sub>10</sub> | 4.11                        | 302                              | 0.14 | H→L+4 44.9%, H-1→L+1 17.4%, H→L+5 8.7%,<br>H-1→L+4 6.8%, H→L+1 6.4%, H→L+3 5.5%   |
| S <sub>11</sub> | 4.31                        | 288                              | 0.17 | H-2→L 41.6%, H-4→L 28.0%, H-8→L 12.1%                                             |
| S <sub>12</sub> | 4.41                        | 281                              | 0.00 | H-3→L 94.3%                                                                       |
| S <sub>13</sub> | 4.44                        | 279                              | 0.02 | H→L+8 23.8%, H→L+6 16.9%, H→L+9 9.9%,<br>H-1→L+3 6.9%, H-1→L+5 5.3%               |
| S <sub>14</sub> | 4.45                        | 278                              | 0.00 | H-11→L+2 81.1%, H-11→L 7.8%, H-11→L+1 5.2%                                        |
| S <sub>15</sub> | 4.49                        | 276                              | 0.03 | H-1→L+3 27.0%, H-2→L+3 18.0%, H→L+8 15.7%                                         |
| S <sub>16</sub> | 4.54                        | 273                              | 0.16 | H-7→L 40.9%, H-7→L+1 15.0%, H→L+10 5.5%                                           |
| S <sub>17</sub> | 4.60                        | 270                              | 0.04 | H-1→L+2 33.4%, H→L+2 27.4%, H-2→L+2 6.4%,<br>H-4→L+2 6.0%                         |
| S <sub>18</sub> | 4.62                        | 268                              | 0.02 | H→L+9 24.5%, H→L+8 22.8%, H→L+6 5.6%                                              |
| S <sub>19</sub> | 4.66                        | 266                              | 0.00 | H-14→L 73.6%, H-14→L+11 9.4%, H-14→L+1 6.3%,<br>H-14→L+7 5.3%                     |
| S <sub>20</sub> | 4.69                        | 265                              | 0.04 | H-3→L+3 31.4%, H→L+6 12.7%, H-1→L+4 9.1%,<br>H-7→L 7.6%, H-2→L+3 5.8%             |
| S <sub>21</sub> | 4.70                        | 264                              | 0.11 | H-3→L+3 42.0%, H→L+6 11.8%, H-1→L+4 9.0%,<br>H-3→L+1 7.2%, H-7→L 5.9%             |
| S <sub>22</sub> | 4.74                        | 262                              | 0.04 | H-2→L+1 38.0%, H-4→L+1 14.2%, H-8→L 7.6%,<br>H-4→L 6.2%                           |
| S <sub>23</sub> | 4.89                        | 254                              | 0.01 | H-1→L+3 17.6%, H→L+6 15.5%, H-2→L+1 11.9%,<br>H-8→L 9.5%, H→L+9 5.2%              |
| S <sub>24</sub> | 4.92                        | 252                              | 0.03 | H-6→L 27.8%, H-1→L+4 15.4%, H-4→L 8.3%,<br>H-8→L 7.1%, H-6→L+1 5.6%, H-2→L+1 5.3% |
| S <sub>25</sub> | 5.02                        | 247                              | 0.03 | H-5→L 18.9%, H-6→L 17.3%, H-8→L 10.9%,<br>H→L+9 9.8%, H-6→L+1 5.6%                |

Table S17. Electronic excitation properties of TPA-Pyc (conf1) in dichloromethane using MN15.

| Excited state   | $E_{\text{vert}}/\text{eV}$ | $\lambda_{\text{cal}}/\text{nm}$ | $f$  | assignment                                                                                                    |
|-----------------|-----------------------------|----------------------------------|------|---------------------------------------------------------------------------------------------------------------|
| S <sub>1</sub>  | 2.79                        | 445                              | 1.63 | H→L 73.0%, H-1→L 13.5%, H→L+1 9.2%                                                                            |
| S <sub>2</sub>  | 3.46                        | 358                              | 0.57 | H→L+1 79.7%, H→L 5.8%                                                                                         |
| S <sub>3</sub>  | 3.54                        | 350                              | 0.48 | H-1→L 61.4%, H→L 20.3%, H-2→L 12.3%                                                                           |
| S <sub>4</sub>  | 4.01                        | 309                              | 0.05 | H→L+2 50.4%, H-1→L+2 18.6%, H→L+3 11.3%,<br>H-1→L+1 8.2%                                                      |
| S <sub>5</sub>  | 4.04                        | 307                              | 0.03 | H→L+3 71.8%, H→L+2 7.7%, H-1→L+3 6.5%                                                                         |
| S <sub>6</sub>  | 4.05                        | 306                              | 0.00 | H-9→L 85.6%, H-9→L+2 6.3%                                                                                     |
| S <sub>7</sub>  | 4.20                        | 295                              | 0.27 | H→L+4 83.4%, H-1→L+4 13.0%                                                                                    |
| S <sub>8</sub>  | 4.28                        | 290                              | 0.15 | H-2→L 54.9%, H-1→L+1 14.3%, H-8→L 9.5%,<br>H-1→L 8.4%                                                         |
| S <sub>9</sub>  | 4.38                        | 283                              | 0.06 | H-1→L+1 47.2%, H→L+5 12.7%, H-2→L 11.3%,<br>H-1→L 9.4%                                                        |
| S <sub>10</sub> | 4.48                        | 277                              | 0.00 | H-9→L+2 75.7%, H-9→L+1 10.8%, H-9→L 7.3%                                                                      |
| S <sub>11</sub> | 4.52                        | 274                              | 0.04 | H→L+5 20.6%, H-5→L 18.3%, H→L+6 15.2%,<br>H-1→L+1 11.7%, H-1→L+5 10.6%, H-5→L+1 7.4%,<br>H-1→L+6 5.2%         |
| S <sub>12</sub> | 4.60                        | 269                              | 0.03 | H→L+7 57.2%, H→L+8 8.8%, H-1→L+3 6.1%                                                                         |
| S <sub>13</sub> | 4.72                        | 262                              | 0.00 | H-11→L 77.0%, H-11→L+10 9.2%                                                                                  |
| S <sub>14</sub> | 4.74                        | 262                              | 0.01 | H→L+8 37.3%, H-1→L+2 7.6%, H→L+2 6.5%,<br>H-1→L+8 6.4%, H→L+7 6.4%, H→L+6 5.9%                                |
| S <sub>15</sub> | 4.77                        | 260                              | 0.01 | H→L+8 24.0%, H-1→L+2 20.2%, H→L+2 14.8%,<br>H-2→L+2 7.8%                                                      |
| S <sub>16</sub> | 4.87                        | 255                              | 0.02 | H→L+5 28.5%, H→L+6 18.5%, H-1→L+2 10.3%,<br>H-5→L 9.5%, H→L+2 9.0%, H→L+9 6.9%                                |
| S <sub>17</sub> | 4.99                        | 248                              | 0.08 | H-5→L 61.3%, H→L+6 18.6%                                                                                      |
| S <sub>18</sub> | 5.11                        | 243                              | 0.01 | H-8→L 29.0%, H-3→L 18.5%, H-4→L 10.6%,<br>H-2→L+1 9.5%, H-2→L 6.9%                                            |
| S <sub>19</sub> | 5.14                        | 241                              | 0.05 | H-3→L 46.8%, H-8→L 15.0%, H-3→L+1 8.4%,<br>H→L+7 5.2%                                                         |
| S <sub>20</sub> | 5.31                        | 234                              | 0.00 | H-4→L 58.4%, H-2→L+1 15.3%                                                                                    |
| S <sub>21</sub> | 5.36                        | 231                              | 0.01 | H-1→L+3 48.4%, H-4→L 7.0%, H-2→L+3 6.3%,<br>H-1→L+7 6.2%, H→L+3 6.0%                                          |
| S <sub>22</sub> | 5.38                        | 230                              | 0.01 | H→L+9 13.9%, H-8→L 12.8%, H-2→L+1 12.1%,<br>H-3→L 8.6%, H-1→L+5 7.4%, H-1→L+6 6.5%,<br>H-4→L 5.8%, H→L+6 5.0% |
| S <sub>23</sub> | 5.45                        | 227                              | 0.03 | H-2→L+1 23.9%, H-8→L 10.6%, H→L+9 10.5%,<br>H-1→L+2 9.8%, H-2→L+2 7.4%                                        |
| S <sub>24</sub> | 5.49                        | 226                              | 0.08 | H-6→L 22.6%, H-3→L 17.6%, H-3→L+1 11.5%,<br>H→L+9 7.9%, H-6→L+1 6.4%                                          |
| S <sub>25</sub> | 5.53                        | 224                              | 0.02 | H-2→L+2 29.1%, H-2→L+1 14.6%, H→L+9 8.0%,<br>H-1→L+2 6.7%, H-5→L+1 5.4%, H-8→L+2 5.1%,<br>H-8→L+1 5.1%        |

Table S18. Electronic excitation properties of TE-Pyc (conf5) in dichloromethane using MN15.

| Excited state   | $E_{\text{vert}}/\text{eV}$ | $\lambda_{\text{cal}}/\text{nm}$ | $f$  | assignment                                                                                          |
|-----------------|-----------------------------|----------------------------------|------|-----------------------------------------------------------------------------------------------------|
| S <sub>1</sub>  | 2.74                        | 452                              | 1.70 | H→L 68.9%, H-1→L 13.7%, H→L+1 11.3%                                                                 |
| S <sub>2</sub>  | 3.34                        | 371                              | 0.79 | H→L+1 71.7%, H→L 13.7%                                                                              |
| S <sub>3</sub>  | 3.39                        | 365                              | 0.47 | H-1→L 57.8%, H→L 16.7%, H-2→L 11.1%,<br>H-4→L 6.3%                                                  |
| S <sub>4</sub>  | 3.69                        | 336                              | 0.46 | H→L+3 76.4%                                                                                         |
| S <sub>5</sub>  | 3.92                        | 317                              | 0.01 | H→L+2 54.4%, H-1→L+2 27.4%, H-2→L+2 6.7%                                                            |
| S <sub>6</sub>  | 3.96                        | 313                              | 0.05 | H→L+4 87.1%                                                                                         |
| S <sub>7</sub>  | 4.07                        | 305                              | 0.17 | H-2→L 34.4%, H-4→L 27.3%, H-1→L 23.7%,<br>H-3→L 5.5%                                                |
| S <sub>8</sub>  | 4.14                        | 300                              | 0.00 | H-11→L 91.5%                                                                                        |
| S <sub>9</sub>  | 4.22                        | 294                              | 0.04 | H-1→L+1 64.7%, H→L+5 10.7%                                                                          |
| S <sub>10</sub> | 4.40                        | 282                              | 0.00 | H-11→L+2 91.2%                                                                                      |
| S <sub>11</sub> | 4.44                        | 279                              | 0.04 | H→L+7 39.1%, H→L+9 7.4%, H-1→L+3 6.2%,<br>H→L+5 6.0%, H-1→L+4 5.5%                                  |
| S <sub>12</sub> | 4.48                        | 277                              | 0.02 | H-2→L 27.5%, H-3→L 14.4%, H-4→L 12.7%,<br>H-1→L+1 6.8%, H→L+5 6.6%                                  |
| S <sub>13</sub> | 4.49                        | 276                              | 0.00 | H→L+5 16.2%, H-3→L 13.8%, H-7→L 10.6%,<br>H-2→L 9.5%, H-1→L+5 8.6%, H→L+6 8.3%,<br>H-1→L+6 6.8%     |
| S <sub>14</sub> | 4.52                        | 275                              | 0.03 | H-3→L 58.5%, H-4→L 16.0%                                                                            |
| S <sub>15</sub> | 4.56                        | 272                              | 0.01 | H→L+2 27.3%, H-1→L+2 22.5%, H-1→L+3 7.4%,<br>H-2→L+3 6.4%, H-4→L+2 6.4%, H-2→L+2 5.4%               |
| S <sub>16</sub> | 4.58                        | 271                              | 0.20 | H-1→L+3 22.3%, H-2→L+3 13.2%, H→L+2 10.1%,<br>H-2→L 6.8%, H-1→L+2 6.7%, H-4→L 6.0%,<br>H-2→L+1 5.5% |
| S <sub>17</sub> | 4.63                        | 268                              | 0.02 | H→L+8 33.7%, H→L+9 16.0%, H→L+6 10.9%,<br>H→L+5 8.7%                                                |
| S <sub>18</sub> | 4.64                        | 267                              | 0.03 | H→L+8 32.4%, H→L+6 16.5%, H→L+5 13.7%                                                               |
| S <sub>19</sub> | 4.67                        | 265                              | 0.00 | H-13→L 77.0%, H-13→L+11 5.7%, H-13→L+10 5.3%                                                        |
| S <sub>20</sub> | 4.70                        | 264                              | 0.13 | H-3→L+3 63.9%, H-3→L+1 16.4%                                                                        |
| S <sub>21</sub> | 4.98                        | 249                              | 0.03 | H-7→L 61.8%, H→L+6 12.1%, H→L+5 7.1%                                                                |
| S <sub>22</sub> | 5.02                        | 247                              | 0.05 | H-2→L+1 48.6%, H-1→L+3 14.8%, H-3→L+1 8.4%,<br>H-7→L 5.8%                                           |
| S <sub>23</sub> | 5.08                        | 244                              | 0.01 | H-6→L 37.4%, H-6→L+1 9.4%, H→L+7 9.1%,<br>H-5→L 7.2%                                                |
| S <sub>24</sub> | 5.12                        | 242                              | 0.01 | H→L+7 17.1%, H→L+9 12.1%, H→L+10 9.7%,<br>H-9→L 7.8%, H-1→L+3 6.4%, H→L+6 5.4%                      |
| S <sub>25</sub> | 5.18                        | 239                              | 0.03 | H→L+9 23.8%, H-1→L+4 16.2%, H-5→L 15.8%,<br>H-9→L 8.6%                                              |

Table S19. Electronic excitation properties of ETE-Pyc (conf6) in dichloromethane using MN15.

| Excited state   | $E_{\text{vert}}/\text{eV}$ | $\lambda_{\text{cal}}/\text{nm}$ | $f$  | assignment                                                                                                         |
|-----------------|-----------------------------|----------------------------------|------|--------------------------------------------------------------------------------------------------------------------|
| S <sub>1</sub>  | 2.75                        | 451                              | 1.82 | H→L 65.8%, H-1→L 15.9%, H→L+1 12.9%                                                                                |
| S <sub>2</sub>  | 3.22                        | 374                              | 0.77 | H→L+1 67.4%, H→L 21.2%                                                                                             |
| S <sub>3</sub>  | 3.36                        | 369                              | 0.30 | H-1→L 62.0%, H→L 12.4%, H-5→L 11.2%,<br>H→L+1 7.0%                                                                 |
| S <sub>4</sub>  | 3.40                        | 365                              | 0.96 | H→L+2 86.7%                                                                                                        |
| S <sub>5</sub>  | 3.88                        | 319                              | 0.03 | H→L+5 83.4%, H→L+4 5.0%                                                                                            |
| S <sub>6</sub>  | 3.96                        | 313                              | 0.01 | H→L+3 48.2%, H-1→L+3 31.6%, H-5→L+3 7.2%                                                                           |
| S <sub>7</sub>  | 4.06                        | 305                              | 0.03 | H→L+4 44.2%, H-1→L+1 28.8%, H-2→L+2 6.9%                                                                           |
| S <sub>8</sub>  | 4.07                        | 305                              | 0.01 | H-2→L 95.7%                                                                                                        |
| S <sub>9</sub>  | 4.12                        | 301                              | 0.01 | H-12→L 88.9%                                                                                                       |
| S <sub>10</sub> | 4.12                        | 301                              | 0.18 | H-5→L 43.7%, H-6→L 24.2%, H-1→L 16.7%                                                                              |
| S <sub>11</sub> | 4.25                        | 292                              | 0.15 | H-1→L+1 50.5%, H→L+4 22.8%                                                                                         |
| S <sub>12</sub> | 4.42                        | 280                              | 0.00 | H-12→L+3 92.9%                                                                                                     |
| S <sub>13</sub> | 4.43                        | 280                              | 0.09 | H→L+8 37.7%, H-2→L+2 8.1%, H→L+9 7.6%                                                                              |
| S <sub>14</sub> | 4.44                        | 279                              | 0.19 | H-1→L+2 16.9%, H-2→L+1 14.4%, H-2→L+2 11.1%,<br>H-2→L+4 10.0%, H-5→L+2 7.4%, H→L+9 6.7%,<br>H→L+7 5.8%, H→L+4 5.0% |
| S <sub>15</sub> | 4.47                        | 277                              | 0.00 | H→L+9 31.5%, H-2→L+2 11.7%, H→L+7 10.7%,<br>H→L+8 6.2%                                                             |
| S <sub>16</sub> | 4.49                        | 276                              | 0.04 | H-2→L+2 20.0%, H→L+8 13.7%, H→L+9 8.5%,<br>H-1→L+2 6.3%, H-2→L+1 5.8%, H-2→L+4 5.3%                                |
| S <sub>17</sub> | 4.52                        | 274                              | 0.04 | H→L+6 24.5%, H-1→L+6 21.9%, H-9→L 15.6%,<br>H-2→L+2 14.1%, H-9→L+1 6.2%                                            |
| S <sub>18</sub> | 4.55                        | 272                              | 0.02 | H-4→L 74.9%, H-3→L 12.8%                                                                                           |
| S <sub>19</sub> | 4.56                        | 272                              | 0.02 | H-3→L 75.1%, H-4→L 13.4%                                                                                           |
| S <sub>20</sub> | 4.57                        | 271                              | 0.02 | H→L+3 46.3%, H-1→L+3 32.2%, H-5→L+3 11.6%                                                                          |
| S <sub>21</sub> | 4.67                        | 266                              | 0.12 | H-4→L+2 45.0%, H-4→L+4 18.9%, H-4→L 9.7%,<br>H-4→L+1 9.2%, H-3→L+2 7.6%                                            |
| S <sub>22</sub> | 4.68                        | 265                              | 0.11 | H-3→L+2 41.4%, H-3→L+4 21.9%, H-3→L 9.1%,<br>H-3→L+1 8.7%, H-4→L+2 8.0%                                            |
| S <sub>23</sub> | 4.73                        | 262                              | 0.00 | H-15→L 76.8%, H-15→L+11 7.6%                                                                                       |
| S <sub>24</sub> | 4.75                        | 261                              | 0.06 | H-6→L 42.6%, H-5→L 31.6%, H-11→L 14.4%                                                                             |
| S <sub>25</sub> | 4.79                        | 259                              | 0.00 | H-2→L+1 52.7%, H-1→L+2 39.3%                                                                                       |

Table S20. Electronic excitation properties of TEBT-Pyc (conf5) in dichloromethane using MN15.

| Excited state   | $E_{\text{vert}}/\text{eV}$ | $\lambda_{\text{cal}}/\text{nm}$ | $f$  | assignment                                                                                      |
|-----------------|-----------------------------|----------------------------------|------|-------------------------------------------------------------------------------------------------|
| S <sub>1</sub>  | 2.58                        | 481                              | 1.89 | H→L 69.5%, H-1→L 13.6%, H→L+1 11.7%                                                             |
| S <sub>2</sub>  | 3.27                        | 379                              | 0.38 | H→L+1 69.6%, H-1→L 7.1%, H→L 6.7%,<br>H→L+3 6.0%                                                |
| S <sub>3</sub>  | 3.31                        | 374                              | 0.40 | H-1→L 57.8%, H→L 22.5%, H-2→L 6.0%,<br>H-1→L+1 5.5%                                             |
| S <sub>4</sub>  | 3.65                        | 340                              | 0.50 | H→L+3 72.0%, H-1→L+3 7.9%, H-1→L+1 6.1%                                                         |
| S <sub>5</sub>  | 3.89                        | 319                              | 0.01 | H→L+2 60.4%, H-1→L+2 27.6%                                                                      |
| S <sub>6</sub>  | 3.93                        | 316                              | 0.04 | H→L+5 41.7%, H→L+4 33.3%, H-1→L+1 9.7%                                                          |
| S <sub>7</sub>  | 3.98                        | 311                              | 0.07 | H→L+5 36.1%, H-1→L+1 29.4%, H→L+4 13.3%                                                         |
| S <sub>8</sub>  | 4.01                        | 309                              | 0.24 | H-2→L 35.1%, H-4→L 34.4%, H-1→L 14.2%                                                           |
| S <sub>9</sub>  | 4.10                        | 302                              | 0.00 | H-11→L 90.8%                                                                                    |
| S <sub>10</sub> | 4.17                        | 297                              | 0.11 | H-1→L+1 33.5%, H→L+4 33.0%, H→L+1 6.9%,<br>H→L+3 5.8%, H→L+5 5.3%                               |
| S <sub>11</sub> | 4.37                        | 284                              | 0.12 | H-2→L 41.8%, H-4→L 28.1%, H-8→L 8.2%                                                            |
| S <sub>12</sub> | 4.44                        | 279                              | 0.00 | H-11→L+2 94.8%                                                                                  |
| S <sub>13</sub> | 4.45                        | 279                              | 0.00 | H-3→L 90.0%                                                                                     |
| S <sub>14</sub> | 4.47                        | 277                              | 0.04 | H→L+7 23.1%, H→L+6 16.2%, H→L+9 15.2%,<br>H→L+8 8.9%, H-1→L+5 8.4%                              |
| S <sub>15</sub> | 4.51                        | 275                              | 0.08 | H-1→L+3 39.1%, H-2→L+3 22.4%, H→L+6 7.1%,<br>H-2→L+1 5.2%                                       |
| S <sub>16</sub> | 4.59                        | 270                              | 0.09 | H-7→L 45.6%, H-7→L+1 16.6%, H-8→L 8.5%,<br>H→L+10 6.0%, H-1→L+1 5.0%                            |
| S <sub>17</sub> | 4.62                        | 269                              | 0.03 | H→L+8 34.3%, H→L+7 29.8%                                                                        |
| S <sub>18</sub> | 4.66                        | 266                              | 0.02 | H-1→L+2 40.1%, H→L+2 36.2%, H-4→L+2 9.7%,<br>H-2→L+2 7.5%                                       |
| S <sub>19</sub> | 4.69                        | 264                              | 0.08 | H-3→L+3 63.4%, H-2→L+3 7.6%, H-3→L+1 7.4%                                                       |
| S <sub>20</sub> | 4.71                        | 263                              | 0.00 | H-14→L 72.7%, H-14→L+11 9.0%, H-14→L+1 8.2%                                                     |
| S <sub>21</sub> | 4.73                        | 262                              | 0.10 | H→L+6 28.2%, H-1→L+4 22.0%, H-3→L+3 9.2%                                                        |
| S <sub>22</sub> | 4.80                        | 258                              | 0.05 | H-2→L+1 33.5%, H-4→L+1 15.5%, H-8→L 9.7%,<br>H-4→L 6.8%                                         |
| S <sub>23</sub> | 4.91                        | 252                              | 0.01 | H-1→L+3 20.9%, H→L+6 14.2%, H-2→L+1 14.0%,<br>H-1→L+4 7.6%, H-2→L+3 5.6%                        |
| S <sub>24</sub> | 4.99                        | 248                              | 0.02 | H-6→L 30.3%, H-4→L 7.1%, H-1→L+4 6.9%,<br>H-2→L+1 6.8%, H-8→L 6.6%, H→L+9 6.1%,<br>H-6→L+1 5.3% |
| S <sub>25</sub> | 5.03                        | 246                              | 0.02 | H-5→L 23.6%, H-8→L 12.4%, H-6→L 9.4%,<br>H-1→L+4 8.8%, H-2→L+1 6.9%, H→L+8 5.9%                 |



Table S21. Vibrational frequencies (in  $\text{cm}^{-1}$ ) of TPA-Pyc in toluene and dichloromethane obtained from B3LYP/6-311G(d,p) calculations.

in toluene

| Freq. # | conf1 | conf2 | conf3 | conf4 |
|---------|-------|-------|-------|-------|
| 1       | 4.5   | 5.1   | 5.9   | 6.5   |
| 2       | 12.7  | 13.1  | 15.5  | 11.0  |
| 3       | 15.3  | 15.6  | 16.0  | 16.0  |
| 4       | 20.3  | 23.6  | 20.6  | 20.1  |
| 5       | 24.4  | 28.6  | 30.8  | 27.2  |
| 6       | 30.4  | 29.4  | 31.2  | 30.4  |
| 7       | 35.2  | 35.5  | 36.6  | 34.8  |
| 8       | 41.8  | 42.1  | 41.5  | 41.0  |
| 9       | 44.3  | 42.8  | 46.1  | 44.6  |
| 10      | 52.1  | 52.8  | 58.4  | 56.3  |
| 11      | 63.1  | 63.8  | 64.6  | 65.5  |
| 12      | 66.8  | 67.2  | 66.3  | 66.0  |
| 13      | 68.3  | 68.6  | 69.8  | 69.6  |
| 14      | 78.1  | 79.0  | 79.3  | 78.8  |
| 15      | 82.1  | 81.4  | 82.7  | 81.7  |
| 16      | 94.8  | 92.1  | 97.1  | 95.2  |
| 17      | 109.4 | 103.0 | 99.6  | 96.3  |
| 18      | 120.4 | 137.8 | 124.4 | 142.9 |
| 19      | 150.1 | 149.3 | 150.3 | 150.6 |
| 20      | 155.1 | 161.5 | 159.6 | 153.7 |
| 21      | 180.7 | 176.1 | 182.0 | 180.8 |
| 22      | 191.4 | 179.5 | 190.5 | 190.2 |
| 23      | 210.0 | 209.2 | 210.2 | 208.0 |
| 24      | 218.1 | 219.9 | 214.1 | 211.8 |
| 25      | 243.9 | 242.3 | 235.3 | 233.1 |
| 26      | 245.3 | 253.5 | 246.3 | 244.9 |
| 27      | 264.9 | 261.5 | 276.2 | 276.2 |
| 28      | 277.4 | 278.2 | 282.6 | 280.6 |
| 29      | 310.7 | 307.7 | 296.9 | 300.7 |
| 30      | 318.8 | 318.1 | 328.0 | 327.0 |
| 31      | 335.3 | 334.8 | 332.3 | 334.0 |
| 32      | 341.1 | 340.9 | 344.7 | 349.1 |
| 33      | 360.8 | 359.9 | 375.0 | 361.2 |
| 34      | 388.0 | 390.5 | 386.4 | 385.8 |
| 35      | 396.9 | 397.2 | 398.1 | 403.9 |
| 36      | 412.6 | 414.0 | 404.2 | 405.9 |
| 37      | 416.8 | 417.8 | 417.9 | 417.1 |
| 38      | 420.1 | 419.9 | 420.1 | 420.1 |
| 39      | 420.4 | 420.6 | 420.6 | 420.6 |
| 40      | 425.2 | 425.1 | 425.3 | 425.3 |
| 41      | 427.1 | 426.8 | 426.7 | 428.0 |
| 42      | 441.0 | 442.1 | 444.0 | 443.6 |

---

|    |       |       |       |       |
|----|-------|-------|-------|-------|
| 43 | 450.3 | 449.2 | 450.1 | 450.3 |
| 44 | 485.9 | 485.2 | 486.2 | 485.2 |
| 45 | 503.5 | 504.3 | 506.0 | 504.6 |
| 46 | 510.9 | 511.7 | 511.8 | 511.4 |
| 47 | 513.6 | 513.8 | 512.8 | 513.2 |
| 48 | 520.3 | 520.5 | 521.0 | 520.1 |
| 49 | 524.5 | 524.3 | 524.8 | 524.6 |
| 50 | 546.3 | 549.3 | 549.3 | 546.4 |
| 51 | 551.0 | 551.9 | 552.2 | 551.4 |
| 52 | 586.1 | 586.2 | 582.2 | 582.4 |
| 53 | 628.8 | 629.5 | 629.7 | 629.8 |
| 54 | 630.6 | 631.3 | 631.6 | 631.1 |
| 55 | 631.3 | 631.6 | 631.7 | 631.7 |
| 56 | 632.0 | 631.8 | 633.3 | 633.6 |
| 57 | 636.1 | 635.9 | 636.2 | 636.0 |
| 58 | 645.6 | 644.2 | 646.4 | 645.9 |
| 59 | 651.3 | 652.9 | 653.7 | 654.2 |
| 60 | 657.5 | 656.6 | 658.2 | 658.0 |
| 61 | 666.9 | 671.5 | 673.9 | 672.5 |
| 62 | 679.1 | 677.5 | 674.4 | 672.8 |
| 63 | 701.8 | 701.9 | 710.5 | 710.8 |
| 64 | 711.3 | 711.2 | 711.2 | 711.3 |
| 65 | 712.2 | 712.0 | 712.8 | 712.5 |
| 66 | 722.6 | 721.4 | 724.2 | 722.1 |
| 67 | 725.6 | 726.2 | 726.2 | 726.1 |
| 68 | 747.0 | 747.5 | 747.2 | 747.3 |
| 69 | 771.8 | 771.6 | 771.8 | 771.8 |
| 70 | 774.0 | 773.7 | 774.0 | 773.8 |
| 71 | 783.9 | 784.2 | 781.9 | 783.6 |
| 72 | 797.9 | 797.6 | 784.1 | 784.0 |
| 73 | 816.8 | 816.3 | 816.5 | 816.4 |
| 74 | 817.3 | 819.4 | 823.3 | 820.3 |
| 75 | 819.3 | 821.4 | 825.6 | 825.5 |
| 76 | 829.3 | 830.3 | 830.5 | 831.0 |
| 77 | 833.0 | 838.0 | 833.2 | 837.9 |
| 78 | 845.8 | 845.9 | 845.6 | 846.1 |
| 79 | 846.8 | 847.2 | 848.1 | 848.4 |
| 80 | 848.7 | 848.4 | 849.2 | 850.2 |
| 81 | 857.0 | 855.6 | 857.0 | 854.8 |
| 82 | 868.6 | 868.8 | 866.8 | 866.8 |
| 83 | 887.6 | 883.7 | 887.4 | 884.5 |
| 84 | 894.3 | 890.4 | 894.5 | 890.6 |
| 85 | 910.4 | 910.1 | 910.3 | 910.2 |
| 86 | 916.0 | 915.7 | 916.0 | 915.8 |
| 87 | 936.2 | 935.9 | 936.2 | 936.2 |
| 88 | 939.8 | 939.4 | 939.8 | 939.7 |
| 89 | 946.2 | 945.8 | 946.1 | 946.0 |

---

---

|     |        |        |        |        |
|-----|--------|--------|--------|--------|
| 90  | 947.9  | 953.1  | 954.3  | 954.2  |
| 91  | 960.5  | 963.4  | 956.4  | 961.1  |
| 92  | 963.8  | 963.7  | 964.2  | 964.1  |
| 93  | 973.5  | 973.0  | 973.5  | 973.5  |
| 94  | 981.1  | 980.8  | 981.0  | 981.0  |
| 95  | 981.8  | 981.6  | 981.8  | 981.8  |
| 96  | 986.4  | 986.4  | 985.9  | 985.4  |
| 97  | 995.0  | 995.7  | 995.3  | 995.4  |
| 98  | 995.7  | 996.8  | 996.7  | 996.8  |
| 99  | 998.2  | 997.9  | 998.2  | 998.2  |
| 100 | 998.5  | 998.4  | 998.6  | 998.5  |
| 101 | 1005.5 | 1004.2 | 1007.0 | 1005.0 |
| 102 | 1013.6 | 1013.4 | 1013.5 | 1013.5 |
| 103 | 1014.2 | 1014.1 | 1014.2 | 1014.1 |
| 104 | 1025.3 | 1025.1 | 1025.4 | 1025.4 |
| 105 | 1028.4 | 1027.9 | 1029.1 | 1028.9 |
| 106 | 1041.9 | 1041.9 | 1041.8 | 1041.4 |
| 107 | 1047.1 | 1046.9 | 1046.9 | 1046.8 |
| 108 | 1048.8 | 1048.5 | 1048.5 | 1048.5 |
| 109 | 1076.4 | 1076.6 | 1075.7 | 1075.5 |
| 110 | 1102.8 | 1102.6 | 1102.7 | 1102.5 |
| 111 | 1104.8 | 1104.6 | 1104.6 | 1104.5 |
| 112 | 1142.1 | 1141.1 | 1141.8 | 1142.0 |
| 113 | 1145.9 | 1147.3 | 1146.2 | 1147.7 |
| 114 | 1173.3 | 1173.8 | 1172.9 | 1172.8 |
| 115 | 1177.9 | 1177.2 | 1177.7 | 1177.2 |
| 116 | 1179.2 | 1178.8 | 1179.0 | 1178.7 |
| 117 | 1189.2 | 1188.8 | 1188.9 | 1189.0 |
| 118 | 1195.7 | 1195.4 | 1195.4 | 1195.5 |
| 119 | 1197.6 | 1196.8 | 1197.3 | 1197.1 |
| 120 | 1203.3 | 1202.1 | 1203.7 | 1202.7 |
| 121 | 1213.2 | 1212.8 | 1213.0 | 1213.1 |
| 122 | 1215.3 | 1216.0 | 1220.1 | 1220.9 |
| 123 | 1222.2 | 1220.6 | 1224.1 | 1223.6 |
| 124 | 1245.4 | 1252.1 | 1250.0 | 1253.2 |
| 125 | 1263.6 | 1258.9 | 1267.4 | 1266.1 |
| 126 | 1281.5 | 1281.2 | 1273.0 | 1272.4 |
| 127 | 1289.2 | 1289.5 | 1289.2 | 1289.4 |
| 128 | 1294.0 | 1294.2 | 1294.1 | 1294.4 |
| 129 | 1302.0 | 1301.0 | 1301.8 | 1301.8 |
| 130 | 1305.2 | 1305.1 | 1305.6 | 1305.3 |
| 131 | 1326.2 | 1325.8 | 1325.8 | 1324.9 |
| 132 | 1332.6 | 1332.5 | 1332.3 | 1332.2 |
| 133 | 1337.5 | 1337.4 | 1337.4 | 1337.4 |
| 134 | 1343.7 | 1343.4 | 1343.6 | 1343.5 |
| 135 | 1352.0 | 1351.0 | 1351.2 | 1350.3 |
| 136 | 1355.1 | 1354.8 | 1354.8 | 1354.9 |

---

---

|     |         |        |        |        |
|-----|---------|--------|--------|--------|
| 137 | 1358.7  | 1357.6 | 1358.8 | 1359.3 |
| 138 | 1360.3  | 1360.1 | 1360.1 | 1360.1 |
| 139 | 1370.7  | 1370.9 | 1371.0 | 1370.8 |
| 140 | 1372.4  | 1371.9 | 1372.8 | 1373.0 |
| 141 | 1405.3  | 1405.1 | 1407.5 | 1407.7 |
| 142 | 1418.9  | 1418.4 | 1410.4 | 1409.1 |
| 143 | 1434.8  | 1435.5 | 1430.6 | 1430.4 |
| 144 | 1446.8  | 1447.8 | 1449.7 | 1450.4 |
| 145 | 1454.9  | 1454.2 | 1457.2 | 1457.2 |
| 146 | 1464.4  | 1463.2 | 1480.6 | 1479.5 |
| 147 | 1481.2  | 1480.9 | 1481.3 | 1480.9 |
| 148 | 1488.2  | 1488.0 | 1488.1 | 1487.9 |
| 149 | 1520.9  | 1520.6 | 1520.7 | 1520.6 |
| 150 | 1522.9  | 1522.6 | 1522.7 | 1522.4 |
| 151 | 1535.8  | 1533.2 | 1535.2 | 1531.8 |
| 152 | 1543.7  | 1542.6 | 1536.8 | 1539.9 |
| 153 | 1548.0  | 1550.4 | 1544.2 | 1543.3 |
| 154 | 1577.6  | 1577.9 | 1579.8 | 1580.8 |
| 155 | 1590.0  | 1589.8 | 1590.4 | 1589.9 |
| 156 | 1609.3  | 1609.3 | 1613.6 | 1613.4 |
| 157 | 1617.2  | 1616.9 | 1617.2 | 1617.0 |
| 158 | 1622.3  | 1622.1 | 1622.3 | 1622.1 |
| 159 | 1628.2  | 1625.9 | 1627.9 | 1625.3 |
| 160 | 1631.1  | 1631.4 | 1630.4 | 1631.3 |
| 161 | 1631.6  | 1631.9 | 1631.5 | 1631.4 |
| 162 | 1641.3  | 1641.0 | 1640.3 | 1639.9 |
| 163 | 1646.6  | 1646.5 | 1645.0 | 1645.0 |
| 164 | 1653.2  | 1652.7 | 1652.9 | 1652.5 |
| 165 | 1679.9  | 1680.8 | 1680.0 | 1680.9 |
| 166 | 1783.6  | 1783.0 | 1783.3 | 1783.6 |
| 167 | 2326.0  | 2326.0 | 2326.4 | 2326.2 |
| 168 | 3134.2  | 3134.3 | 3134.0 | 3135.1 |
| 169 | 3137.9  | 3137.1 | 3136.5 | 3138.3 |
| 170 | 3144.2  | 3143.0 | 3143.1 | 3144.2 |
| 171 | 3155.8  | 3155.8 | 3158.4 | 3155.8 |
| 172 | 3160.6  | 3161.3 | 3160.9 | 3160.9 |
| 173 | 3163.7  | 3163.7 | 3163.7 | 3163.6 |
| 174 | 3163.9  | 3163.8 | 3163.9 | 3163.8 |
| 175 | 3166.6  | 3171.1 | 3165.2 | 3171.0 |
| 176 | 3171.13 | 13171. | 3170.8 | 3171.1 |
| 177 | 3171.2  | 1      | 3171.0 | 3173.7 |
| 178 | 3173.6  | 3174.2 | 3171.2 | 3174.7 |
| 179 | 3175.6  | 3174.3 | 3175.5 | 3175.4 |
| 180 | 3184.5  | 3175.1 | 3184.5 | 3182.1 |
| 181 | 3184.6  | 3182.7 | 3184.6 | 3184.4 |
| 182 | 3188.3  | 3184.5 | 3188.5 | 3184.6 |
| 183 | 3190.9  | 3184.7 | 3190.8 | 3190.8 |

---

3191.0

|     |        |        |        |        |
|-----|--------|--------|--------|--------|
| 184 | 3191.1 | 3191.1 | 3191.0 | 3191.0 |
| 185 | 3192.9 | 3192.7 | 3192.9 | 3192.9 |
| 186 | 3194.4 | 3193.8 | 3194.3 | 3194.2 |
| 187 | 3194.9 | 3195.0 | 3194.9 | 3194.9 |
| 188 | 3195.0 | 3195.1 | 3195.0 | 3195.0 |
| 189 | 3196.1 | 3196.6 | 3195.2 | 3195.2 |
| 190 | 3245.3 | 3244.4 | 3245.5 | 3244.5 |
| 191 | 3591.2 | 3589.5 | 3591.4 | 3588.8 |
| 192 | 3767.1 | 3768.2 | 3768.4 | 3768.2 |

in dichloromethane

| Freq. # | conf1 | conf2 | conf3  | conf4  |
|---------|-------|-------|--------|--------|
| 1       | 4.9   | 5.0   | 6.2    | 7.2    |
| 2       | 12.4  | 12.5  | 15.4   | 10.0   |
| 3       | 14.3  | 15.5  | 16.1   | 15.8   |
| 4       | 19.6  | 23.3  | 21.0   | 19.9   |
| 5       | 24.5  | 27.4  | 29.4   | 27.0   |
| 6       | 29.0  | 28.6  | 30.9   | 29.5   |
| 7       | 35.1  | 34.2  | 37.3   | 33.9   |
| 8       | 41.3  | 41.9  | 41.5   | 40.7   |
| 9       | 43.3  | 42.2  | 45.9   | 44.2   |
| 10      | 50.1  | 49.4  | 58.0   | 54.6   |
| 11      | 62.7  | 64.0  | 64.3   | 65.1   |
| 12      | 65.1  | 66.9  | 66.2   | 66.0   |
| 13      | 67.1  | 68.7  | 69.3   | 69.8   |
| 14      | 78.5  | 78.7  | 79.3   | 78.3   |
| 15      | 81.4  | 80.8  | 82.3   | 81.0   |
| 16      | 96.6  | 93.5  | 98.7   | 94.9   |
| 17      | 108.4 | 102.8 | 99.7   | 97.2   |
| 18      | 120.1 | 137.5 | 124.2  | 142.4  |
| 19      | 150.4 | 149.4 | 151.3  | 150.8  |
| 20      | 156.3 | 162.4 | 160.6  | 154.4  |
| 21      | 181.6 | 176.2 | 183.5  | 181.4  |
| 22      | 190.9 | 180.2 | 190.6  | 190.1  |
| 23      | 210.1 | 209.3 | 210.4  | 207.9  |
| 24      | 217.8 | 219.8 | 214.1  | 212.1  |
| 25      | 243.6 | 242.2 | 235.3  | 233.0  |
| 26      | 245.3 | 253.0 | 246.0  | 244.8  |
| 27      | 264.5 | 261.3 | 276.8  | 276.4  |
| 28      | 277.8 | 278.5 | 282.7  | 280.5  |
| 29      | 310.2 | 307.3 | 296.4  | 300.3  |
| 30      | 318.1 | 317.9 | 327.6  | 326.5  |
| 31      | 335.5 | 334.8 | 332.3  | 334.3  |
| 32      | 340.7 | 340.7 | 344.83 | 8349.0 |
| 33      | 360.6 | 359.7 | 374.9  | 360.7  |
| 34      | 388.6 | 390.6 | 387.1  | 385.8  |

---

|    |       |       |       |       |
|----|-------|-------|-------|-------|
| 35 | 396.4 | 396.4 | 397.6 | 403.7 |
| 36 | 412.1 | 413.6 | 404.9 | 405.8 |
| 37 | 417.3 | 417.9 | 418.5 | 417.5 |
| 38 | 420.1 | 419.9 | 420.1 | 420.2 |
| 39 | 420.3 | 420.6 | 420.7 | 420.7 |
| 40 | 424.9 | 424.8 | 425.2 | 425.2 |
| 41 | 427.1 | 426.2 | 427.6 | 428.2 |
| 42 | 441.1 | 442.6 | 444.5 | 444.4 |
| 43 | 450.1 | 449.2 | 449.8 | 450.2 |
| 44 | 485.7 | 485.2 | 486.2 | 485.1 |
| 45 | 505.1 | 506.0 | 507.4 | 506.4 |
| 46 | 511.3 | 511.7 | 512.2 | 511.6 |
| 47 | 513.6 | 514.0 | 512.9 | 513.3 |
| 48 | 519.8 | 520.2 | 520.6 | 519.9 |
| 49 | 524.3 | 524.1 | 524.5 | 524.4 |
| 50 | 541.0 | 545.3 | 543.5 | 542.5 |
| 51 | 550.9 | 551.1 | 551.6 | 551.1 |
| 52 | 585.3 | 585.4 | 581.5 | 581.8 |
| 53 | 628.1 | 628.9 | 629.2 | 629.3 |
| 54 | 629.7 | 630.6 | 630.8 | 630.4 |
| 55 | 630.6 | 630.8 | 631.1 | 631.2 |
| 56 | 631.4 | 631.3 | 632.7 | 633.0 |
| 57 | 635.5 | 635.3 | 635.6 | 635.5 |
| 58 | 645.1 | 643.7 | 645.9 | 645.3 |
| 59 | 650.7 | 652.2 | 653.1 | 653.5 |
| 60 | 656.7 | 655.9 | 657.5 | 657.2 |
| 61 | 667.7 | 672.8 | 671.4 | 670.8 |
| 62 | 678.5 | 676.9 | 674.1 | 672.3 |
| 63 | 701.6 | 702.1 | 710.3 | 710.6 |
| 64 | 710.9 | 710.8 | 710.8 | 711.0 |
| 65 | 711.4 | 711.3 | 712.4 | 712.1 |
| 66 | 722.0 | 720.8 | 723.8 | 721.7 |
| 67 | 725.9 | 726.1 | 726.5 | 726.0 |
| 68 | 747.1 | 747.3 | 747.3 | 747.1 |
| 69 | 771.7 | 771.5 | 771.6 | 771.7 |
| 70 | 774.1 | 773.8 | 774.0 | 773.9 |
| 71 | 783.0 | 783.3 | 781.5 | 782.8 |
| 72 | 797.1 | 796.7 | 783.4 | 783.1 |
| 73 | 816.3 | 815.9 | 816.0 | 815.9 |
| 74 | 817.0 | 820.7 | 822.8 | 823.3 |
| 75 | 823.7 | 822.8 | 827.7 | 825.2 |
| 76 | 830.2 | 831.1 | 831.5 | 831.8 |
| 77 | 833.4 | 838.6 | 834.0 | 838.7 |
| 78 | 846.2 | 846.2 | 846.1 | 846.6 |
| 79 | 846.3 | 846.7 | 847.4 | 847.7 |
| 80 | 847.9 | 847.7 | 848.8 | 849.8 |
| 81 | 856.5 | 854.8 | 856.8 | 854.6 |

---

---

|     |        |        |        |        |
|-----|--------|--------|--------|--------|
| 82  | 869.0  | 869.2  | 867.5  | 867.3  |
| 83  | 886.7  | 883.1  | 886.6  | 883.9  |
| 84  | 895.5  | 892.4  | 896.0  | 892.7  |
| 85  | 910.5  | 910.3  | 910.5  | 910.5  |
| 86  | 916.1  | 915.9  | 916.1  | 916.1  |
| 87  | 935.2  | 935.0  | 935.5  | 935.4  |
| 88  | 939.6  | 939.3  | 939.6  | 939.6  |
| 89  | 946.2  | 945.8  | 946.1  | 946.1  |
| 90  | 955.5  | 958.4  | 959.7  | 959.4  |
| 91  | 964.4  | 965.4  | 962.9  | 964.8  |
| 92  | 965.4  | 965.6  | 966.0  | 966.2  |
| 93  | 975.9  | 975.5  | 976.0  | 976.1  |
| 94  | 983.4  | 983.2  | 983.3  | 983.4  |
| 95  | 983.9  | 983.7  | 983.9  | 983.9  |
| 96  | 986.9  | 987.0  | 987.1  | 986.7  |
| 97  | 995.4  | 995.4  | 996.2  | 995.2  |
| 98  | 996.1  | 996.9  | 996.8  | 997.8  |
| 99  | 1000.9 | 1000.7 | 1000.9 | 1000.9 |
| 100 | 1001.3 | 1001.1 | 1001.3 | 1001.3 |
| 101 | 1006.4 | 1005.5 | 1009.1 | 1006.5 |
| 102 | 1012.8 | 1012.7 | 1012.7 | 1012.7 |
| 103 | 1013.3 | 1013.1 | 1013.2 | 1013.2 |
| 104 | 1024.5 | 1024.2 | 1024.5 | 1024.4 |
| 105 | 1027.8 | 1027.3 | 1028.5 | 1028.2 |
| 106 | 1041.2 | 1041.1 | 1041.3 | 1040.6 |
| 107 | 1045.9 | 1045.7 | 1045.7 | 1045.7 |
| 108 | 1047.5 | 1047.4 | 1047.4 | 1047.4 |
| 109 | 1080.1 | 1080.5 | 1079.7 | 1079.4 |
| 110 | 1101.4 | 1101.4 | 1101.3 | 1101.3 |
| 111 | 1103.2 | 1103.2 | 1103.1 | 1103.2 |
| 112 | 1140.9 | 1139.9 | 1140.8 | 1141.2 |
| 113 | 1144.7 | 1145.9 | 1145.0 | 1147.0 |
| 114 | 1168.4 | 1169.3 | 1168.7 | 1168.1 |
| 115 | 1175.2 | 1175.0 | 1174.9 | 1174.9 |
| 116 | 1176.4 | 1176.3 | 1176.3 | 1176.3 |
| 117 | 1187.7 | 1187.5 | 1187.5 | 1187.7 |
| 118 | 1193.2 | 1193.1 | 1192.9 | 1193.2 |
| 119 | 1195.6 | 1195.0 | 1195.3 | 1195.3 |
| 120 | 1202.5 | 1201.2 | 1202.9 | 1202.0 |
| 121 | 1211.8 | 1211.4 | 1211.6 | 1211.8 |
| 122 | 1215.1 | 1215.9 | 1219.5 | 1219.6 |
| 123 | 1221.1 | 1219.1 | 1223.5 | 1223.6 |
| 124 | 1245.4 | 1252.8 | 1249.8 | 1253.7 |
| 125 | 1263.5 | 1258.6 | 1266.7 | 1264.9 |
| 126 | 1280.8 | 1280.7 | 1272.7 | 1272.1 |
| 127 | 1287.1 | 1287.4 | 1287.2 | 1287.3 |
| 128 | 1292.8 | 1292.9 | 1292.9 | 1293.0 |

---

---

|     |        |        |        |        |
|-----|--------|--------|--------|--------|
| 129 | 1300.0 | 1299.1 | 1299.8 | 1299.8 |
| 130 | 1304.5 | 1304.1 | 1304.7 | 1304.3 |
| 131 | 1325.9 | 1325.6 | 1326.3 | 1325.1 |
| 132 | 1332.4 | 1332.2 | 1331.8 | 1331.8 |
| 133 | 1335.8 | 1335.7 | 1335.7 | 1335.7 |
| 134 | 1342.8 | 1342.5 | 1342.6 | 1342.7 |
| 135 | 1351.4 | 1350.8 | 1351.2 | 1350.2 |
| 136 | 1354.2 | 1354.0 | 1354.0 | 1354.1 |
| 137 | 1358.4 | 1357.8 | 1358.6 | 1358.8 |
| 138 | 1359.1 | 1359.1 | 1359.5 | 1360.2 |
| 139 | 1370.7 | 1371.2 | 1371.6 | 1371.1 |
| 140 | 1372.3 | 1372.3 | 1373.2 | 1373.7 |
| 141 | 1404.3 | 1404.4 | 1407.6 | 1407.2 |
| 142 | 1418.8 | 1418.5 | 1411.4 | 1410.2 |
| 143 | 1434.4 | 1435.0 | 1430.0 | 1429.3 |
| 144 | 1444.4 | 1445.7 | 1447.7 | 1448.2 |
| 145 | 1453.5 | 1453.0 | 1455.7 | 1456.0 |
| 146 | 1462.7 | 1462.0 | 1479.7 | 1479.2 |
| 147 | 1479.9 | 1479.7 | 1480.6 | 1479.8 |
| 148 | 1486.8 | 1486.8 | 1486.8 | 1486.7 |
| 149 | 1518.9 | 1518.7 | 1518.8 | 1518.8 |
| 150 | 1521.3 | 1521.1 | 1521.1 | 1520.9 |
| 151 | 1534.6 | 1532.0 | 1529.8 | 1529.1 |
| 152 | 1542.1 | 1541.5 | 1534.5 | 1535.5 |
| 153 | 1543.4 | 1545.3 | 1543.1 | 1542.1 |
| 154 | 1575.6 | 1575.7 | 1578.1 | 1578.9 |
| 155 | 1588.6 | 1588.5 | 1589.1 | 1588.7 |
| 156 | 1603.5 | 1603.7 | 1607.4 | 1607.4 |
| 157 | 1615.8 | 1615.6 | 1615.7 | 1615.6 |
| 158 | 1620.8 | 1620.5 | 1620.7 | 1620.4 |
| 159 | 1626.1 | 1623.9 | 1625.8 | 1623.4 |
| 160 | 1629.1 | 1629.0 | 1628.9 | 1629.0 |
| 161 | 1629.4 | 1630.3 | 1629.1 | 1629.9 |
| 162 | 1639.7 | 1639.4 | 1638.9 | 1638.5 |
| 163 | 1644.7 | 1644.6 | 1643.1 | 1643.0 |
| 164 | 1651.2 | 1650.7 | 1650.9 | 1650.5 |
| 165 | 1678.2 | 1679.2 | 1678.3 | 1679.3 |
| 166 | 1764.5 | 1764.1 | 1764.3 | 1764.6 |
| 167 | 2321.2 | 2321.4 | 2321.5 | 2321.3 |
| 168 | 3136.1 | 3135.3 | 3135.3 | 3136.0 |
| 169 | 3143.7 | 3143.2 | 3143.8 | 3144.3 |
| 170 | 3145.1 | 3143.8 | 3144.0 | 3144.8 |
| 171 | 3161.2 | 3160.3 | 3162.4 | 3159.6 |
| 172 | 3162.3 | 3162.6 | 3163.0 | 3162.4 |
| 173 | 3165.0 | 3164.9 | 3165.0 | 3165.0 |
| 174 | 3165.2 | 3165.1 | 3165.2 | 3165.2 |
| 175 | 3167.0 | 3171.9 | 3166.5 | 3172.0 |

---



|     |        |        |        |        |
|-----|--------|--------|--------|--------|
| 176 | 3172.0 | 3172.0 | 3171.9 | 3172.1 |
| 177 | 3172.1 | 3176.0 | 3172.2 | 3175.9 |
| 178 | 3176.0 | 3176.6 | 3174.7 | 3176.2 |
| 179 | 3176.2 | 3177.0 | 3176.3 | 3176.6 |
| 180 | 3184.7 | 3182.7 | 3184.7 | 3182.6 |
| 181 | 3184.8 | 3184.7 | 3184.8 | 3184.7 |
| 182 | 3189.2 | 3184.9 | 3189.2 | 3184.9 |
| 183 | 3190.7 | 3190.7 | 3190.7 | 3190.7 |
| 184 | 3190.8 | 3190.9 | 3190.8 | 3190.9 |
| 185 | 3193.0 | 3192.6 | 3192.8 | 3193.0 |
| 186 | 3194.6 | 3194.1 | 3194.4 | 3194.4 |
| 187 | 3195.1 | 3195.1 | 3195.1 | 3195.0 |
| 188 | 3195.2 | 3195.2 | 3195.1 | 3195.1 |
| 189 | 3196.2 | 3196.4 | 3195.3 | 3195.3 |
| 190 | 3245.0 | 3244.1 | 3245.0 | 3244.1 |
| 191 | 3586.6 | 3585.3 | 3588.4 | 3585.3 |
| 192 | 3760.5 | 3761.8 | 3761.9 | 3762.0 |

Table S22. Vibrational frequencies (in  $\text{cm}^{-1}$ ) of TE-Pyc in toluene and dichloromethane obtained from B3LYP/6-311G(d,p) calculations.

in toluene

| Freq. # | conf1 | conf4 | conf5 | conf6 | conf7 | conf8 | conf9 | conf10 |
|---------|-------|-------|-------|-------|-------|-------|-------|--------|
| 1       | 5.9   | 5.7   | 5.3   | 6.1   | 6.3   | 4.5   | 4.7   | 5.6    |
| 2       | 8.2   | 9.7   | 9.2   | 8.2   | 8.7   | 7.3   | 6.6   | 8.5    |
| 3       | 11.0  | 12.3  | 11.5  | 9.5   | 10.7  | 10.4  | 8.5   | 12.5   |
| 4       | 14.5  | 16.5  | 12.3  | 13.6  | 15.5  | 13.6  | 13.3  | 14.6   |
| 5       | 18.8  | 19.2  | 18.1  | 19.8  | 20.0  | 18.3  | 19.6  | 19.4   |
| 6       | 25.1  | 23.7  | 24.3  | 24.7  | 25.3  | 23.6  | 22.9  | 22.2   |
| 7       | 29.0  | 29.8  | 29.8  | 28.8  | 27.1  | 30.2  | 29.9  | 25.3   |
| 8       | 32.5  | 32.1  | 30.6  | 29.8  | 30.5  | 31.8  | 34.2  | 32.0   |
| 9       | 35.6  | 37.7  | 37.3  | 36.7  | 37.4  | 36.3  | 37.8  | 37.3   |
| 10      | 38.3  | 41.7  | 40.3  | 39.7  | 40.6  | 41.8  | 38.5  | 40.0   |
| 11      | 49.3  | 49.6  | 47.4  | 49.4  | 47.9  | 47.8  | 51.9  | 48.0   |
| 12      | 58.2  | 55.2  | 56.8  | 56.0  | 55.2  | 57.1  | 58.5  | 53.8   |
| 13      | 61.3  | 57.5  | 59.7  | 59.7  | 59.8  | 60.7  | 61.7  | 58.2   |
| 14      | 66.1  | 67.8  | 66.4  | 66.2  | 65.9  | 66.2  | 66.5  | 67.5   |
| 15      | 68.9  | 69.8  | 72.1  | 67.8  | 70.5  | 69.6  | 68.5  | 70.7   |
| 16      | 75.0  | 73.3  | 72.7  | 73.0  | 75.8  | 75.8  | 74.2  | 70.9   |
| 17      | 82.2  | 80.0  | 81.7  | 79.2  | 79.2  | 82.3  | 79.7  | 81.9   |
| 18      | 84.6  | 84.9  | 85.4  | 84.5  | 84.4  | 84.3  | 85.3  | 87.6   |
| 19      | 94.1  | 93.0  | 91.8  | 93.3  | 93.7  | 95.2  | 97.8  | 93.4   |
| 20      | 97.6  | 110.8 | 98.0  | 98.0  | 98.6  | 99.9  | 99.7  | 99.8   |
| 21      | 113.7 | 114.4 | 111.1 | 112.5 | 114.3 | 110.9 | 111.0 | 113.7  |
| 22      | 119.3 | 116.8 | 133.5 | 137.9 | 132.5 | 120.5 | 138.2 | 131.2  |

|    |       |       |       |       |       |       |       |       |
|----|-------|-------|-------|-------|-------|-------|-------|-------|
| 23 | 150.4 | 147.3 | 144.9 | 144.8 | 148.2 | 144.0 | 145.2 | 147.9 |
| 24 | 155.2 | 149.8 | 150.1 | 149.3 | 149.4 | 150.4 | 151.7 | 150.0 |
| 25 | 155.9 | 155.4 | 155.9 | 156.0 | 157.1 | 159.8 | 156.2 | 158.0 |
| 26 | 172.1 | 172.9 | 178.5 | 171.6 | 174.4 | 174.6 | 169.9 | 176.1 |
| 27 | 188.7 | 189.2 | 185.4 | 190.2 | 189.9 | 190.8 | 191.8 | 182.6 |
| 28 | 196.3 | 202.7 | 192.9 | 194.8 | 199.1 | 199.0 | 194.0 | 191.5 |
| 29 | 210.4 | 210.3 | 211.2 | 209.8 | 210.1 | 209.8 | 213.1 | 210.9 |
| 30 | 216.7 | 218.8 | 219.5 | 218.9 | 219.3 | 225.3 | 215.5 | 221.5 |
| 31 | 220.6 | 237.2 | 233.8 | 227.0 | 222.4 | 231.2 | 226.9 | 225.6 |
| 32 | 249.1 | 245.1 | 245.8 | 245.0 | 239.4 | 235.8 | 246.2 | 257.6 |
| 33 | 275.4 | 269.9 | 271.7 | 276.2 | 276.2 | 271.6 | 271.2 | 270.5 |
| 34 | 276.9 | 277.8 | 276.3 | 278.8 | 279.4 | 276.0 | 276.8 | 278.0 |
| 35 | 294.2 | 288.1 | 282.7 | 284.2 | 284.0 | 287.0 | 298.3 | 286.0 |
| 36 | 306.7 | 301.0 | 301.5 | 301.3 | 306.7 | 305.5 | 308.8 | 305.6 |
| 37 | 321.9 | 324.3 | 327.5 | 330.1 | 327.3 | 321.1 | 319.1 | 323.7 |
| 38 | 329.1 | 331.4 | 332.1 | 332.8 | 332.8 | 332.1 | 330.6 | 330.6 |
| 39 | 338.3 | 338.1 | 335.5 | 337.5 | 338.4 | 338.2 | 337.6 | 335.8 |
| 40 | 347.0 | 350.1 | 351.6 | 350.8 | 347.9 | 347.6 | 352.9 | 337.6 |
| 41 | 362.9 | 360.4 | 368.5 | 362.1 | 357.3 | 368.6 | 363.9 | 358.6 |
| 42 | 380.0 | 373.2 | 370.2 | 370.9 | 380.8 | 377.8 | 371.5 | 378.8 |
| 43 | 385.1 | 383.9 | 383.0 | 385.5 | 384.8 | 384.2 | 376.7 | 386.0 |
| 44 | 387.9 | 394.0 | 395.7 | 393.4 | 391.4 | 390.4 | 391.3 | 395.4 |
| 45 | 404.0 | 399.5 | 406.1 | 405.0 | 404.7 | 404.3 | 406.2 | 399.3 |
| 46 | 411.8 | 417.3 | 407.5 | 410.3 | 409.7 | 407.0 | 417.1 | 416.3 |
| 47 | 418.2 | 418.6 | 417.8 | 417.6 | 417.3 | 417.9 | 418.9 | 418.5 |
| 48 | 419.9 | 420.3 | 419.3 | 420.2 | 419.8 | 419.2 | 420.3 | 420.0 |
| 49 | 420.4 | 420.9 | 421.5 | 421.5 | 421.2 | 421.2 | 421.9 | 421.8 |
| 50 | 424.9 | 425.4 | 425.6 | 425.5 | 425.3 | 425.1 | 426.1 | 425.0 |
| 51 | 429.6 | 427.7 | 427.0 | 426.2 | 426.0 | 428.1 | 429.4 | 427.2 |
| 52 | 438.6 | 438.5 | 438.5 | 438.3 | 438.7 | 439.3 | 438.2 | 437.9 |
| 53 | 443.5 | 442.8 | 443.9 | 443.7 | 443.7 | 444.1 | 444.4 | 442.2 |
| 54 | 446.1 | 450.4 | 447.6 | 450.4 | 446.6 | 445.1 | 450.6 | 444.6 |
| 55 | 466.0 | 459.3 | 460.3 | 460.1 | 465.5 | 465.1 | 460.2 | 466.9 |
| 56 | 487.3 | 486.0 | 485.6 | 484.9 | 486.4 | 485.7 | 484.5 | 486.7 |
| 57 | 501.7 | 503.0 | 503.0 | 502.9 | 501.3 | 501.1 | 503.0 | 501.4 |
| 58 | 506.0 | 506.2 | 506.3 | 506.0 | 505.9 | 505.9 | 506.3 | 506.2 |
| 59 | 513.5 | 513.5 | 513.6 | 513.8 | 513.4 | 513.3 | 514.6 | 513.4 |
| 60 | 520.1 | 520.7 | 521.0 | 520.4 | 520.0 | 520.0 | 520.6 | 520.6 |
| 61 | 523.1 | 523.5 | 523.4 | 523.1 | 522.7 | 523.0 | 523.8 | 522.8 |
| 62 | 535.7 | 535.7 | 535.4 | 535.4 | 535.3 | 535.9 | 535.2 | 535.4 |
| 63 | 545.6 | 545.7 | 546.6 | 545.7 | 545.5 | 545.3 | 545.4 | 544.7 |
| 64 | 547.9 | 549.1 | 549.1 | 550.0 | 547.7 | 546.4 | 550.9 | 551.1 |
| 65 | 552.5 | 553.2 | 552.5 | 553.1 | 552.3 | 552.6 | 553.4 | 553.2 |
| 66 | 570.2 | 569.8 | 569.1 | 569.8 | 570.2 | 569.2 | 569.5 | 569.4 |
| 67 | 583.7 | 587.2 | 583.8 | 583.8 | 583.6 | 583.2 | 583.9 | 588.2 |
| 68 | 631.1 | 629.5 | 631.0 | 631.0 | 631.2 | 631.0 | 631.0 | 630.2 |
| 69 | 631.6 | 631.3 | 631.6 | 631.8 | 631.3 | 631.1 | 632.2 | 631.8 |

|     |       |       |       |       |       |       |       |       |
|-----|-------|-------|-------|-------|-------|-------|-------|-------|
| 70  | 632.3 | 632.0 | 633.1 | 633.2 | 633.5 | 633.1 | 632.6 | 631.9 |
| 71  | 643.4 | 640.5 | 642.3 | 642.5 | 642.8 | 641.9 | 641.2 | 639.8 |
| 72  | 647.7 | 648.5 | 648.0 | 647.9 | 647.9 | 649.5 | 648.8 | 647.1 |
| 73  | 651.9 | 651.9 | 652.2 | 651.8 | 651.9 | 652.3 | 651.7 | 652.1 |
| 74  | 655.4 | 653.6 | 655.9 | 655.8 | 655.7 | 655.7 | 657.5 | 655.3 |
| 75  | 660.9 | 659.4 | 660.8 | 660.8 | 660.7 | 659.5 | 658.8 | 659.3 |
| 76  | 668.0 | 672.7 | 673.3 | 672.9 | 670.4 | 671.4 | 673.6 | 672.8 |
| 77  | 675.7 | 679.4 | 674.5 | 673.0 | 673.3 | 675.3 | 676.8 | 678.0 |
| 78  | 684.9 | 685.6 | 685.8 | 685.0 | 684.7 | 685.3 | 684.7 | 685.0 |
| 79  | 708.2 | 702.7 | 707.4 | 708.5 | 708.4 | 707.5 | 708.4 | 702.0 |
| 80  | 711.0 | 709.6 | 711.3 | 711.0 | 711.1 | 711.1 | 711.3 | 709.1 |
| 81  | 712.6 | 711.7 | 712.9 | 712.7 | 712.4 | 712.7 | 712.5 | 711.6 |
| 82  | 714.9 | 712.7 | 713.9 | 713.2 | 713.1 | 714.7 | 713.3 | 712.3 |
| 83  | 726.0 | 725.3 | 725.4 | 725.3 | 725.4 | 725.7 | 726.0 | 725.4 |
| 84  | 732.3 | 732.3 | 732.0 | 731.7 | 731.7 | 732.7 | 731.5 | 731.3 |
| 85  | 745.1 | 745.7 | 745.6 | 745.7 | 745.0 | 745.2 | 745.8 | 745.0 |
| 86  | 748.3 | 748.9 | 749.0 | 749.0 | 748.8 | 748.7 | 748.4 | 748.3 |
| 87  | 773.2 | 773.2 | 773.4 | 773.3 | 773.4 | 773.4 | 773.6 | 773.5 |
| 88  | 782.8 | 784.0 | 783.7 | 783.8 | 783.7 | 782.2 | 783.7 | 784.2 |
| 89  | 784.4 | 798.3 | 784.3 | 784.0 | 783.9 | 783.9 | 784.6 | 798.0 |
| 90  | 816.7 | 816.6 | 816.7 | 816.5 | 816.6 | 816.7 | 816.5 | 816.6 |
| 91  | 822.7 | 817.3 | 821.7 | 821.1 | 820.7 | 822.6 | 821.5 | 818.7 |
| 92  | 824.4 | 822.2 | 825.0 | 824.7 | 824.9 | 824.2 | 824.9 | 820.8 |
| 93  | 829.3 | 828.9 | 830.6 | 830.2 | 830.7 | 829.7 | 830.6 | 829.9 |
| 94  | 832.0 | 832.7 | 832.9 | 834.1 | 835.7 | 832.3 | 834.1 | 834.5 |
| 95  | 835.7 | 834.2 | 838.0 | 837.1 | 835.9 | 835.2 | 837.0 | 835.6 |
| 96  | 837.7 | 837.9 | 839.3 | 839.4 | 839.3 | 837.3 | 840.1 | 839.4 |
| 97  | 845.6 | 845.0 | 847.2 | 845.9 | 846.2 | 845.8 | 846.0 | 846.2 |
| 98  | 848.9 | 847.4 | 849.4 | 849.2 | 849.8 | 848.8 | 849.2 | 847.8 |
| 99  | 850.9 | 850.3 | 851.2 | 851.1 | 851.1 | 851.9 | 851.0 | 850.8 |
| 100 | 856.6 | 857.0 | 854.5 | 854.0 | 854.8 | 855.8 | 854.5 | 854.9 |
| 101 | 857.5 | 858.8 | 857.5 | 858.6 | 857.2 | 856.3 | 858.5 | 857.1 |
| 102 | 867.2 | 869.2 | 867.0 | 866.9 | 866.9 | 866.9 | 866.9 | 868.7 |
| 103 | 887.8 | 887.5 | 884.4 | 884.7 | 884.5 | 887.7 | 884.8 | 883.8 |
| 104 | 894.3 | 894.4 | 890.8 | 890.1 | 890.2 | 894.7 | 891.0 | 889.6 |
| 105 | 912.0 | 912.1 | 912.4 | 911.9 | 912.0 | 912.0 | 911.8 | 912.0 |
| 106 | 914.0 | 913.7 | 914.0 | 913.5 | 914.0 | 914.2 | 913.8 | 913.6 |
| 107 | 930.5 | 931.4 | 931.2 | 931.3 | 930.6 | 930.3 | 931.2 | 930.9 |
| 108 | 936.4 | 936.2 | 935.6 | 936.5 | 936.5 | 935.8 | 936.0 | 935.8 |
| 109 | 936.7 | 936.8 | 936.3 | 936.6 | 936.8 | 936.7 | 936.4 | 935.8 |
| 110 | 943.7 | 943.0 | 944.2 | 943.3 | 943.6 | 943.7 | 943.7 | 944.0 |
| 111 | 952.8 | 950.2 | 955.6 | 955.1 | 954.7 | 952.6 | 955.5 | 952.6 |
| 112 | 963.3 | 961.4 | 959.9 | 957.3 | 956.0 | 960.9 | 964.8 | 962.7 |
| 113 | 965.3 | 963.7 | 963.9 | 963.8 | 964.1 | 964.0 | 966.9 | 963.3 |
| 114 | 968.7 | 968.6 | 967.7 | 968.8 | 968.7 | 967.7 | 968.7 | 967.9 |
| 115 | 973.5 | 973.6 | 973.4 | 973.5 | 973.8 | 974.0 | 974.3 | 973.5 |
| 116 | 980.5 | 980.1 | 981.5 | 980.7 | 980.6 | 981.4 | 980.3 | 981.0 |

|     |        |        |        |        |        |        |        |        |
|-----|--------|--------|--------|--------|--------|--------|--------|--------|
| 117 | 981.8  | 981.6  | 981.9  | 981.7  | 981.8  | 981.4  | 981.9  | 981.6  |
| 118 | 982.0  | 982.3  | 982.3  | 982.3  | 982.0  | 982.5  | 982.2  | 982.1  |
| 119 | 985.8  | 986.5  | 985.2  | 984.4  | 985.2  | 984.8  | 985.4  | 985.7  |
| 120 | 994.9  | 995.2  | 995.7  | 995.8  | 995.8  | 995.3  | 995.6  | 995.2  |
| 121 | 996.4  | 996.0  | 996.5  | 996.5  | 996.5  | 995.9  | 996.3  | 996.4  |
| 122 | 998.3  | 998.3  | 998.7  | 998.3  | 998.5  | 998.4  | 998.5  | 998.6  |
| 123 | 1006.4 | 1005.4 | 1005.6 | 1005.8 | 1005.1 | 1004.4 | 1006.1 | 1005.0 |
| 124 | 1013.8 | 1013.7 | 1013.8 | 1013.8 | 1013.8 | 1013.7 | 1014.0 | 1013.9 |
| 125 | 1025.3 | 1025.1 | 1025.0 | 1025.1 | 1025.1 | 1024.9 | 1025.2 | 1025.2 |
| 126 | 1029.0 | 1028.2 | 1028.7 | 1029.2 | 1029.1 | 1027.9 | 1028.4 | 1028.4 |
| 127 | 1029.4 | 1029.6 | 1029.4 | 1029.5 | 1029.6 | 1029.5 | 1029.4 | 1029.5 |
| 128 | 1042.1 | 1042.7 | 1041.7 | 1041.8 | 1041.7 | 1041.8 | 1041.6 | 1042.0 |
| 129 | 1044.8 | 1044.8 | 1044.1 | 1044.9 | 1044.9 | 1044.3 | 1044.7 | 1044.8 |
| 130 | 1047.7 | 1047.8 | 1047.6 | 1047.6 | 1047.7 | 1047.7 | 1047.7 | 1047.8 |
| 131 | 1076.2 | 1077.0 | 1075.6 | 1075.9 | 1075.7 | 1075.6 | 1075.8 | 1076.6 |
| 132 | 1082.2 | 1082.2 | 1083.6 | 1082.3 | 1082.4 | 1083.3 | 1082.0 | 1082.1 |
| 133 | 1103.4 | 1103.7 | 1103.4 | 1103.5 | 1103.6 | 1103.7 | 1103.5 | 1103.4 |
| 134 | 1117.9 | 1117.2 | 1118.1 | 1117.4 | 1117.6 | 1118.1 | 1117.2 | 1117.7 |
| 135 | 1141.5 | 1141.1 | 1141.7 | 1141.8 | 1141.9 | 1140.8 | 1142.1 | 1141.7 |
| 136 | 1146.1 | 1145.4 | 1147.4 | 1147.7 | 1147.7 | 1144.9 | 1146.8 | 1147.1 |
| 137 | 1148.1 | 1148.3 | 1148.4 | 1148.6 | 1148.9 | 1149.4 | 1148.1 | 1148.9 |
| 138 | 1159.9 | 1160.0 | 1159.6 | 1159.9 | 1160.2 | 1159.6 | 1159.7 | 1159.8 |
| 139 | 1174.5 | 1175.2 | 1173.4 | 1173.8 | 1173.4 | 1173.1 | 1173.2 | 1174.4 |
| 140 | 1177.7 | 1178.1 | 1177.9 | 1177.9 | 1178.4 | 1178.1 | 1178.1 | 1178.1 |
| 141 | 1187.7 | 1188.1 | 1188.1 | 1188.2 | 1187.9 | 1188.1 | 1187.7 | 1188.0 |
| 142 | 1190.7 | 1191.3 | 1191.9 | 1191.5 | 1191.1 | 1191.5 | 1190.6 | 1191.0 |
| 143 | 1196.0 | 1196.2 | 1196.0 | 1196.0 | 1196.2 | 1196.1 | 1196.0 | 1196.0 |
| 144 | 1203.4 | 1202.6 | 1201.8 | 1202.4 | 1202.4 | 1202.1 | 1202.0 | 1202.0 |
| 145 | 1205.0 | 1204.9 | 1204.8 | 1205.0 | 1205.1 | 1204.9 | 1205.1 | 1205.3 |
| 146 | 1220.0 | 1215.8 | 1220.8 | 1220.8 | 1221.0 | 1219.9 | 1220.4 | 1216.0 |
| 147 | 1220.4 | 1220.8 | 1221.0 | 1221.1 | 1221.2 | 1221.5 | 1220.9 | 1220.4 |
| 148 | 1224.0 | 1221.8 | 1223.7 | 1223.8 | 1223.7 | 1223.6 | 1223.5 | 1220.9 |
| 149 | 1249.8 | 1245.2 | 1251.5 | 1251.7 | 1251.8 | 1249.0 | 1251.6 | 1251.1 |
| 150 | 1267.5 | 1263.2 | 1265.3 | 1265.3 | 1265.4 | 1266.6 | 1265.6 | 1258.6 |
| 151 | 1269.9 | 1269.8 | 1268.9 | 1270.0 | 1269.9 | 1268.5 | 1269.3 | 1270.3 |
| 152 | 1273.3 | 1281.8 | 1272.7 | 1272.5 | 1272.4 | 1272.8 | 1272.9 | 1281.7 |
| 153 | 1286.9 | 1287.0 | 1286.1 | 1287.3 | 1286.8 | 1285.7 | 1287.2 | 1287.0 |
| 154 | 1290.6 | 1290.6 | 1291.0 | 1290.8 | 1290.7 | 1290.4 | 1290.9 | 1291.3 |
| 155 | 1292.8 | 1293.3 | 1292.0 | 1293.0 | 1292.9 | 1292.5 | 1292.7 | 1292.0 |
| 156 | 1296.8 | 1296.9 | 1297.2 | 1297.1 | 1297.2 | 1296.5 | 1296.4 | 1297.1 |
| 157 | 1301.4 | 1301.9 | 1302.3 | 1302.2 | 1302.2 | 1302.2 | 1301.4 | 1301.3 |
| 158 | 1304.5 | 1303.5 | 1303.5 | 1303.5 | 1303.6 | 1303.6 | 1304.2 | 1304.1 |
| 159 | 1324.7 | 1325.5 | 1324.3 | 1324.6 | 1324.7 | 1325.6 | 1324.0 | 1324.0 |
| 160 | 1326.8 | 1327.1 | 1326.0 | 1326.5 | 1326.6 | 1326.4 | 1326.3 | 1327.2 |
| 161 | 1332.9 | 1332.8 | 1332.2 | 1331.9 | 1332.1 | 1332.0 | 1332.3 | 1332.7 |
| 162 | 1342.0 | 1341.8 | 1341.7 | 1341.7 | 1341.8 | 1341.7 | 1342.1 | 1342.1 |
| 163 | 1349.0 | 1349.5 | 1349.0 | 1349.2 | 1349.3 | 1349.4 | 1348.4 | 1349.2 |

|     |        |        |        |        |        |        |        |        |
|-----|--------|--------|--------|--------|--------|--------|--------|--------|
| 164 | 1352.3 | 1352.5 | 1351.5 | 1351.8 | 1351.9 | 1352.1 | 1351.6 | 1352.0 |
| 165 | 1357.6 | 1356.1 | 1356.5 | 1356.6 | 1356.8 | 1354.9 | 1357.2 | 1356.9 |
| 166 | 1358.6 | 1358.5 | 1358.7 | 1358.8 | 1359.0 | 1358.3 | 1358.3 | 1358.3 |
| 167 | 1371.8 | 1371.5 | 1371.7 | 1371.7 | 1371.6 | 1370.5 | 1371.4 | 1371.3 |
| 168 | 1372.9 | 1372.6 | 1372.7 | 1372.8 | 1372.8 | 1371.8 | 1372.4 | 1372.1 |
| 169 | 1390.9 | 1390.9 | 1391.6 | 1391.2 | 1391.0 | 1391.0 | 1390.7 | 1391.0 |
| 170 | 1394.5 | 1395.1 | 1394.5 | 1394.1 | 1394.7 | 1394.2 | 1393.8 | 1394.4 |
| 171 | 1409.3 | 1407.1 | 1408.5 | 1408.3 | 1408.2 | 1408.3 | 1408.2 | 1404.7 |
| 172 | 1410.6 | 1419.4 | 1409.9 | 1409.9 | 1409.7 | 1409.7 | 1409.1 | 1418.1 |
| 173 | 1431.1 | 1437.8 | 1430.9 | 1430.9 | 1430.8 | 1430.6 | 1430.8 | 1434.7 |
| 174 | 1443.5 | 1443.9 | 1443.5 | 1443.8 | 1443.9 | 1444.0 | 1443.6 | 1443.7 |
| 175 | 1450.2 | 1446.8 | 1450.9 | 1450.8 | 1450.9 | 1449.8 | 1450.9 | 1447.8 |
| 176 | 1455.9 | 1454.6 | 1456.1 | 1455.9 | 1456.0 | 1455.6 | 1456.1 | 1454.8 |
| 177 | 1459.9 | 1458.8 | 1459.7 | 1459.9 | 1460.0 | 1459.4 | 1460.0 | 1458.6 |
| 178 | 1481.3 | 1465.3 | 1480.1 | 1480.2 | 1480.1 | 1480.5 | 1479.6 | 1463.7 |
| 179 | 1484.4 | 1484.9 | 1484.3 | 1484.6 | 1484.8 | 1484.8 | 1484.6 | 1484.3 |
| 180 | 1490.2 | 1489.9 | 1489.7 | 1490.0 | 1490.3 | 1490.2 | 1489.4 | 1490.3 |
| 181 | 1493.3 | 1492.7 | 1492.4 | 1492.7 | 1492.9 | 1492.9 | 1492.3 | 1493.1 |
| 182 | 1518.4 | 1518.0 | 1517.7 | 1518.0 | 1518.3 | 1517.9 | 1517.9 | 1518.4 |
| 183 | 1521.2 | 1521.5 | 1521.4 | 1521.3 | 1521.4 | 1521.4 | 1521.2 | 1521.5 |
| 184 | 1534.5 | 1534.7 | 1531.3 | 1531.6 | 1531.5 | 1534.1 | 1531.2 | 1532.8 |
| 185 | 1536.7 | 1542.1 | 1539.7 | 1539.8 | 1539.8 | 1536.5 | 1539.7 | 1541.2 |
| 186 | 1542.9 | 1546.1 | 1541.7 | 1542.0 | 1542.1 | 1542.2 | 1541.8 | 1546.3 |
| 187 | 1546.5 | 1547.9 | 1546.2 | 1546.3 | 1546.5 | 1546.3 | 1546.2 | 1550.4 |
| 188 | 1579.3 | 1577.2 | 1580.8 | 1580.9 | 1580.7 | 1579.0 | 1580.2 | 1577.7 |
| 189 | 1585.3 | 1585.0 | 1584.9 | 1585.0 | 1585.1 | 1585.2 | 1584.7 | 1584.4 |
| 190 | 1595.7 | 1595.0 | 1595.1 | 1595.2 | 1595.2 | 1595.2 | 1595.4 | 1595.6 |
| 191 | 1613.5 | 1609.1 | 1613.5 | 1613.4 | 1613.3 | 1613.3 | 1613.5 | 1609.3 |
| 192 | 1619.8 | 1620.0 | 1619.9 | 1620.0 | 1620.1 | 1620.0 | 1619.9 | 1619.9 |
| 193 | 1626.1 | 1625.9 | 1624.4 | 1624.6 | 1624.6 | 1625.5 | 1624.9 | 1625.0 |
| 194 | 1627.7 | 1628.2 | 1625.8 | 1626.0 | 1626.1 | 1627.6 | 1625.9 | 1626.3 |
| 195 | 1630.1 | 1631.0 | 1631.2 | 1631.3 | 1631.2 | 1629.8 | 1631.0 | 1631.6 |
| 196 | 1635.1 | 1635.0 | 1635.0 | 1635.1 | 1635.2 | 1634.9 | 1635.1 | 1635.4 |
| 197 | 1641.7 | 1643.1 | 1641.3 | 1641.3 | 1641.4 | 1641.4 | 1641.3 | 1642.8 |
| 198 | 1646.5 | 1647.5 | 1646.3 | 1646.3 | 1646.4 | 1646.5 | 1646.3 | 1647.3 |
| 199 | 1653.0 | 1653.2 | 1652.5 | 1652.5 | 1652.5 | 1652.8 | 1652.5 | 1652.7 |
| 200 | 1679.7 | 1679.7 | 1680.6 | 1680.5 | 1680.6 | 1679.5 | 1680.4 | 1680.5 |
| 201 | 1783.5 | 1783.3 | 1783.5 | 1783.2 | 1783.2 | 1783.7 | 1783.4 | 1783.3 |
| 202 | 2326.1 | 2326.0 | 2326.0 | 2326.2 | 2326.1 | 2326.2 | 2326.3 | 2325.9 |
| 203 | 3023.5 | 3022.5 | 3022.4 | 3022.7 | 3022.5 | 3022.4 | 3022.6 | 3023.2 |
| 204 | 3035.0 | 3034.2 | 3033.7 | 3034.4 | 3034.2 | 3033.7 | 3034.4 | 3034.7 |
| 205 | 3119.3 | 3119.0 | 3118.8 | 3118.8 | 3119.5 | 3118.5 | 3118.7 | 3119.1 |
| 206 | 3122.0 | 3121.8 | 3120.7 | 3121.5 | 3121.9 | 3120.6 | 3121.5 | 3121.9 |
| 207 | 3134.2 | 3134.5 | 3133.9 | 3133.2 | 3133.9 | 3133.4 | 3133.9 | 3134.5 |
| 208 | 3141.2 | 3137.5 | 3139.9 | 3139.4 | 3138.8 | 3138.6 | 3139.1 | 3137.2 |
| 209 | 3143.7 | 3143.9 | 3143.0 | 3142.2 | 3142.9 | 3142.0 | 3143.0 | 3143.1 |
| 210 | 3157.9 | 3155.3 | 3158.2 | 3157.5 | 3156.6 | 3156.8 | 3156.6 | 3154.7 |

|     |        |        |        |        |        |        |        |        |
|-----|--------|--------|--------|--------|--------|--------|--------|--------|
| 211 | 3160.5 | 3160.6 | 3161.0 | 3161.3 | 3161.4 | 3160.9 | 3160.9 | 3161.2 |
| 212 | 3163.8 | 3163.9 | 3163.9 | 3163.8 | 3163.8 | 3163.8 | 3163.8 | 3163.9 |
| 213 | 3165.4 | 3166.6 | 3168.6 | 3168.8 | 3169.8 | 3164.8 | 3169.1 | 3169.8 |
| 214 | 3169.7 | 3169.1 | 3171.3 | 3171.2 | 3171.2 | 3169.2 | 3171.3 | 3171.3 |
| 215 | 3171.2 | 3171.2 | 3174.7 | 3173.8 | 3173.8 | 3171.2 | 3174.1 | 3173.7 |
| 216 | 3175.6 | 3173.8 | 3174.9 | 3174.8 | 3174.7 | 3173.4 | 3174.7 | 3173.9 |
| 217 | 3176.0 | 3175.5 | 3175.9 | 3175.4 | 3175.3 | 3175.1 | 3175.2 | 3174.7 |
| 218 | 3184.6 | 3184.7 | 3181.7 | 3181.2 | 3181.5 | 3184.6 | 3181.7 | 3182.4 |
| 219 | 3185.2 | 3185.4 | 3184.6 | 3184.6 | 3184.5 | 3185.2 | 3184.5 | 3184.6 |
| 220 | 3189.2 | 3188.3 | 3184.9 | 3185.2 | 3185.2 | 3188.1 | 3185.3 | 3185.2 |
| 221 | 3191.1 | 3191.1 | 3191.0 | 3191.0 | 3191.0 | 3191.1 | 3191.1 | 3191.0 |
| 222 | 3191.7 | 3191.7 | 3191.9 | 3191.6 | 3191.8 | 3191.7 | 3191.8 | 3192.1 |
| 223 | 3192.7 | 3193.1 | 3193.2 | 3193.1 | 3193.1 | 3193.0 | 3193.0 | 3192.9 |
| 224 | 3194.3 | 3194.4 | 3194.3 | 3194.3 | 3194.3 | 3194.3 | 3194.3 | 3194.0 |
| 225 | 3195.1 | 3195.1 | 3195.1 | 3195.0 | 3195.0 | 3195.0 | 3195.0 | 3195.0 |
| 226 | 3195.3 | 3196.3 | 3195.3 | 3195.6 | 3195.7 | 3195.1 | 3195.0 | 3196.8 |
| 227 | 3217.4 | 3217.5 | 3220.8 | 3217.7 | 3217.8 | 3222.9 | 3217.4 | 3217.7 |
| 228 | 3245.7 | 3245.7 | 3244.4 | 3244.0 | 3243.9 | 3245.5 | 3244.2 | 3244.6 |
| 229 | 3257.3 | 3257.2 | 3257.7 | 3257.8 | 3257.5 | 3257.6 | 3257.0 | 3257.3 |
| 230 | 3591.7 | 3590.9 | 3589.9 | 3589.6 | 3588.4 | 3590.6 | 3589.7 | 3590.5 |
| 231 | 3767.7 | 3768.3 | 3767.6 | 3767.8 | 3768.2 | 3767.5 | 3768.0 | 3768.6 |

in dichloromethane

| Freq. # | conf1 | conf4 | conf5 | conf6 | conf7 | conf8 | conf9 | conf10 |
|---------|-------|-------|-------|-------|-------|-------|-------|--------|
| 1       | 6.4   | 6.5   | 1.9   | 7.2   | 7.3   | 5.0   | 6.2   | 6.3    |
| 2       | 8.4   | 9.4   | 7.1   | 8.5   | 8.8   | 7.4   | 7.4   | 9.6    |
| 3       | 11.8  | 13.1  | 9.6   | 10.0  | 11.1  | 10.4  | 10.5  | 13.1   |
| 4       | 14.8  | 17.7  | 10.6  | 14.2  | 15.9  | 12.2  | 15.4  | 14.8   |
| 5       | 19.3  | 19.5  | 17.2  | 20.3  | 20.2  | 17.5  | 21.8  | 19.9   |
| 6       | 25.1  | 23.6  | 24.0  | 24.8  | 25.2  | 23.4  | 23.5  | 22.3   |
| 7       | 28.2  | 30.7  | 28.7  | 26.9  | 27.9  | 28.4  | 25.8  | 25.6   |
| 8       | 32.4  | 33.0  | 29.5  | 29.6  | 30.5  | 33.1  | 32.5  | 31.6   |
| 9       | 35.7  | 37.0  | 37.2  | 36.1  | 36.9  | 35.4  | 37.5  | 36.8   |
| 10      | 37.9  | 41.7  | 39.6  | 39.6  | 40.5  | 41.5  | 38.0  | 39.3   |
| 11      | 49.0  | 49.3  | 47.2  | 49.1  | 47.6  | 47.4  | 50.9  | 47.6   |
| 12      | 57.4  | 55.0  | 54.6  | 53.8  | 54.8  | 56.3  | 56.8  | 52.5   |
| 13      | 60.8  | 57.9  | 59.3  | 59.6  | 59.7  | 59.2  | 60.1  | 57.8   |
| 14      | 66.2  | 68.1  | 65.5  | 66.6  | 65.9  | 65.4  | 66.2  | 67.1   |
| 15      | 69.0  | 69.4  | 72.0  | 67.7  | 70.3  | 69.0  | 67.4  | 70.4   |
| 16      | 75.0  | 72.8  | 72.1  | 72.7  | 75.7  | 76.7  | 74.1  | 71.0   |
| 17      | 81.9  | 79.5  | 81.1  | 79.3  | 78.9  | 81.1  | 79.0  | 80.8   |
| 18      | 84.0  | 84.3  | 84.9  | 83.8  | 83.7  | 83.7  | 85.1  | 87.5   |
| 19      | 95.6  | 94.1  | 91.4  | 93.9  | 94.1  | 94.9  | 95.6  | 93.7   |
| 20      | 97.9  | 110.6 | 98.4  | 97.9  | 99.0  | 100.5 | 99.2  | 99.5   |
| 21      | 112.9 | 113.1 | 109.0 | 112.2 | 114.0 | 110.2 | 111.4 | 113.8  |
| 22      | 119.1 | 116.5 | 133.1 | 137.5 | 132.2 | 119.7 | 137.6 | 130.8  |

|    |       |       |       |       |       |       |       |       |
|----|-------|-------|-------|-------|-------|-------|-------|-------|
| 23 | 150.6 | 146.3 | 144.5 | 144.7 | 148.4 | 143.9 | 145.0 | 147.9 |
| 24 | 154.8 | 150.4 | 149.9 | 148.9 | 149.3 | 150.9 | 150.4 | 149.8 |
| 25 | 157.0 | 156.6 | 156.5 | 156.9 | 157.8 | 160.4 | 156.4 | 158.5 |
| 26 | 172.6 | 173.5 | 179.0 | 172.2 | 175.0 | 175.1 | 169.8 | 175.9 |
| 27 | 189.3 | 189.2 | 185.1 | 190.3 | 190.2 | 190.5 | 190.6 | 182.7 |
| 28 | 196.3 | 203.2 | 192.7 | 194.7 | 199.2 | 199.2 | 194.1 | 191.5 |
| 29 | 210.7 | 210.4 | 211.7 | 209.9 | 210.9 | 211.7 | 210.9 | 211.6 |
| 30 | 216.3 | 218.9 | 219.2 | 218.5 | 218.9 | 224.9 | 215.0 | 221.0 |
| 31 | 220.3 | 236.9 | 232.9 | 226.9 | 221.9 | 230.4 | 226.8 | 225.4 |
| 32 | 248.9 | 245.0 | 245.6 | 244.8 | 239.2 | 235.9 | 245.8 | 257.3 |
| 33 | 275.5 | 269.5 | 271.4 | 276.7 | 276.9 | 271.4 | 270.7 | 270.3 |
| 34 | 277.1 | 278.8 | 276.6 | 278.8 | 279.2 | 276.6 | 278.0 | 278.7 |
| 35 | 293.9 | 287.9 | 282.3 | 283.7 | 283.4 | 286.7 | 297.6 | 285.6 |
| 36 | 306.2 | 300.3 | 301.3 | 300.7 | 306.4 | 305.1 | 308.1 | 305.2 |
| 37 | 321.8 | 324.2 | 327.0 | 329.9 | 326.8 | 320.2 | 318.5 | 323.4 |
| 38 | 328.9 | 330.7 | 331.2 | 332.4 | 332.2 | 332.0 | 330.4 | 330.1 |
| 39 | 337.9 | 337.6 | 334.8 | 337.1 | 338.1 | 338.2 | 337.1 | 335.4 |
| 40 | 346.7 | 349.7 | 351.3 | 350.4 | 347.5 | 347.6 | 352.3 | 337.4 |
| 41 | 362.7 | 360.2 | 368.6 | 361.5 | 356.7 | 368.3 | 363.1 | 358.1 |
| 42 | 380.0 | 373.1 | 370.1 | 370.8 | 380.4 | 377.9 | 371.1 | 378.6 |
| 43 | 384.8 | 383.6 | 382.7 | 385.4 | 384.8 | 382.9 | 375.8 | 385.9 |
| 44 | 387.8 | 393.8 | 395.2 | 392.9 | 390.9 | 390.9 | 391.0 | 394.8 |
| 45 | 403.6 | 399.6 | 406.0 | 404.9 | 404.7 | 404.3 | 405.5 | 399.1 |
| 46 | 411.5 | 417.5 | 406.8 | 409.8 | 409.2 | 406.7 | 416.7 | 416.3 |
| 47 | 418.6 | 418.4 | 418.1 | 417.9 | 418.0 | 418.4 | 418.4 | 418.7 |
| 48 | 419.9 | 420.3 | 419.7 | 420.3 | 419.9 | 419.3 | 420.3 | 420.0 |
| 49 | 420.5 | 420.9 | 421.5 | 421.5 | 421.2 | 421.2 | 421.7 | 421.8 |
| 50 | 424.7 | 425.2 | 425.7 | 425.4 | 425.3 | 424.9 | 425.8 | 424.7 |
| 51 | 428.8 | 427.6 | 426.8 | 425.7 | 425.7 | 427.2 | 429.2 | 427.0 |
| 52 | 438.3 | 438.0 | 438.0 | 438.1 | 438.3 | 439.0 | 438.0 | 437.6 |
| 53 | 444.5 | 443.9 | 444.3 | 444.6 | 444.6 | 444.0 | 444.7 | 442.8 |
| 54 | 445.7 | 449.9 | 447.4 | 450.0 | 446.3 | 444.9 | 450.2 | 444.7 |
| 55 | 465.7 | 459.1 | 460.0 | 460.0 | 465.2 | 463.9 | 459.5 | 466.6 |
| 56 | 486.9 | 486.1 | 485.5 | 484.8 | 486.3 | 485.9 | 484.5 | 486.4 |
| 57 | 501.6 | 503.0 | 503.5 | 503.0 | 501.3 | 501.1 | 502.9 | 501.5 |
| 58 | 508.6 | 508.4 | 508.1 | 508.1 | 508.2 | 507.8 | 507.8 | 508.0 |
| 59 | 513.9 | 513.9 | 513.8 | 513.9 | 513.8 | 513.9 | 514.3 | 513.6 |
| 60 | 519.8 | 520.3 | 520.6 | 519.9 | 519.7 | 520.1 | 520.3 | 520.4 |
| 61 | 522.9 | 523.3 | 523.1 | 522.8 | 522.5 | 523.0 | 523.6 | 522.6 |
| 62 | 535.6 | 535.2 | 535.1 | 535.5 | 535.1 | 535.7 | 535.3 | 535.5 |
| 63 | 543.6 | 543.1 | 543.2 | 543.6 | 542.5 | 542.9 | 544.6 | 544.0 |
| 64 | 544.8 | 545.3 | 546.2 | 545.3 | 544.9 | 544.7 | 546.9 | 545.8 |
| 65 | 552.3 | 553.0 | 552.1 | 552.6 | 552.0 | 552.5 | 552.8 | 552.5 |
| 66 | 569.7 | 569.3 | 568.7 | 569.3 | 569.8 | 568.8 | 569.1 | 569.1 |
| 67 | 583.0 | 586.5 | 583.1 | 583.0 | 582.8 | 582.4 | 583.0 | 587.4 |
| 68 | 630.6 | 629.0 | 630.4 | 630.5 | 630.6 | 630.4 | 630.4 | 629.6 |
| 69 | 630.7 | 630.5 | 630.5 | 630.8 | 630.7 | 630.5 | 631.3 | 630.8 |

|     |       |       |       |       |       |       |       |       |
|-----|-------|-------|-------|-------|-------|-------|-------|-------|
| 70  | 631.7 | 631.4 | 632.6 | 632.6 | 632.9 | 632.6 | 631.9 | 631.2 |
| 71  | 642.8 | 640.1 | 641.7 | 641.9 | 642.2 | 641.4 | 640.5 | 639.5 |
| 72  | 647.1 | 648.1 | 647.5 | 647.4 | 647.4 | 649.1 | 648.2 | 646.7 |
| 73  | 651.3 | 651.4 | 651.5 | 651.1 | 651.3 | 651.7 | 651.1 | 651.4 |
| 74  | 654.7 | 652.9 | 655.2 | 655.1 | 654.9 | 654.9 | 656.7 | 654.8 |
| 75  | 660.2 | 658.7 | 660.0 | 660.0 | 659.9 | 658.8 | 658.1 | 658.6 |
| 76  | 667.4 | 676.8 | 671.9 | 669.6 | 670.5 | 674.9 | 667.4 | 674.9 |
| 77  | 675.6 | 679.1 | 673.0 | 672.7 | 673.1 | 677.4 | 673.4 | 677.4 |
| 78  | 684.5 | 685.1 | 685.3 | 684.6 | 684.2 | 685.3 | 684.0 | 684.8 |
| 79  | 707.8 | 703.0 | 707.0 | 708.2 | 708.1 | 707.2 | 708.0 | 702.2 |
| 80  | 710.7 | 709.0 | 710.9 | 710.7 | 710.7 | 710.6 | 711.0 | 708.7 |
| 81  | 712.2 | 711.2 | 712.7 | 712.5 | 712.1 | 712.4 | 712.2 | 711.2 |
| 82  | 714.8 | 712.5 | 713.6 | 713.1 | 713.0 | 714.5 | 713.1 | 712.1 |
| 83  | 726.2 | 725.6 | 725.5 | 725.4 | 725.5 | 725.8 | 725.9 | 725.6 |
| 84  | 731.7 | 731.7 | 731.4 | 731.2 | 731.2 | 732.3 | 730.8 | 730.7 |
| 85  | 744.6 | 745.4 | 745.5 | 745.4 | 744.6 | 744.8 | 745.3 | 744.7 |
| 86  | 748.1 | 748.6 | 748.9 | 748.6 | 748.5 | 748.6 | 748.2 | 748.1 |
| 87  | 773.5 | 773.4 | 773.6 | 773.6 | 773.5 | 773.4 | 773.8 | 773.7 |
| 88  | 782.2 | 783.3 | 782.9 | 782.9 | 782.9 | 781.6 | 782.9 | 783.2 |
| 89  | 783.4 | 797.6 | 783.4 | 783.2 | 783.1 | 783.2 | 783.6 | 797.2 |
| 90  | 816.3 | 816.2 | 816.2 | 816.1 | 816.1 | 816.1 | 816.0 | 816.4 |
| 91  | 822.7 | 816.9 | 824.2 | 823.4 | 823.3 | 822.3 | 822.6 | 820.2 |
| 92  | 826.6 | 826.2 | 824.7 | 824.3 | 824.8 | 826.6 | 824.6 | 823.2 |
| 93  | 830.7 | 829.7 | 831.1 | 830.6 | 831.5 | 831.0 | 830.5 | 830.6 |
| 94  | 832.7 | 832.5 | 832.2 | 832.4 | 833.4 | 833.5 | 832.6 | 833.1 |
| 95  | 833.3 | 833.4 | 836.8 | 836.5 | 835.5 | 834.2 | 836.3 | 834.6 |
| 96  | 837.1 | 836.8 | 839.5 | 839.2 | 839.6 | 835.7 | 839.7 | 839.3 |
| 97  | 845.4 | 844.2 | 846.4 | 845.3 | 845.8 | 845.6 | 845.3 | 845.5 |
| 98  | 848.5 | 847.1 | 848.9 | 848.3 | 849.1 | 848.3 | 848.4 | 847.5 |
| 99  | 849.4 | 848.9 | 850.2 | 850.3 | 849.8 | 850.3 | 850.2 | 849.4 |
| 100 | 855.6 | 856.3 | 854.2 | 853.9 | 854.6 | 854.0 | 854.3 | 854.2 |
| 101 | 856.6 | 856.8 | 856.0 | 856.7 | 855.3 | 856.8 | 856.6 | 855.2 |
| 102 | 868.0 | 869.6 | 867.5 | 867.4 | 867.3 | 867.4 | 867.3 | 869.0 |
| 103 | 887.0 | 886.8 | 883.7 | 884.0 | 883.9 | 886.7 | 883.6 | 883.3 |
| 104 | 895.9 | 895.7 | 893.1 | 892.1 | 892.4 | 896.2 | 892.4 | 891.8 |
| 105 | 912.5 | 912.5 | 912.7 | 912.6 | 912.5 | 912.5 | 912.4 | 912.6 |
| 106 | 914.3 | 914.0 | 914.1 | 914.0 | 914.3 | 914.5 | 914.2 | 913.9 |
| 107 | 927.8 | 928.5 | 928.3 | 928.5 | 927.9 | 927.6 | 928.3 | 928.1 |
| 108 | 935.6 | 935.5 | 935.2 | 935.5 | 935.5 | 935.2 | 935.0 | 934.9 |
| 109 | 936.0 | 936.2 | 935.4 | 935.9 | 936.0 | 936.1 | 935.7 | 935.2 |
| 110 | 943.8 | 943.2 | 944.3 | 943.6 | 943.8 | 943.5 | 943.9 | 944.2 |
| 111 | 958.6 | 957.2 | 960.4 | 959.0 | 958.0 | 958.3 | 958.8 | 958.7 |
| 112 | 965.3 | 964.2 | 963.4 | 959.7 | 959.8 | 961.3 | 966.0 | 965.2 |
| 113 | 966.0 | 965.4 | 966.1 | 965.7 | 966.1 | 965.8 | 968.9 | 965.7 |
| 114 | 969.3 | 969.2 | 968.8 | 969.4 | 969.5 | 968.7 | 969.1 | 968.5 |
| 115 | 976.1 | 975.9 | 976.1 | 975.9 | 976.4 | 976.5 | 976.4 | 975.8 |
| 116 | 981.1 | 980.6 | 980.8 | 981.0 | 981.0 | 980.4 | 980.8 | 980.9 |



|     |        |        |        |        |        |        |        |        |
|-----|--------|--------|--------|--------|--------|--------|--------|--------|
| 117 | 981.5  | 981.5  | 982.9  | 981.7  | 981.7  | 982.7  | 981.6  | 981.6  |
| 118 | 984.0  | 983.8  | 984.2  | 983.8  | 983.9  | 983.9  | 984.2  | 984.1  |
| 119 | 987.2  | 987.1  | 986.4  | 985.9  | 986.5  | 986.8  | 986.6  | 986.2  |
| 120 | 995.7  | 995.9  | 995.1  | 995.8  | 996.0  | 995.3  | 996.2  | 995.5  |
| 121 | 996.4  | 996.4  | 997.4  | 996.8  | 997.2  | 996.8  | 996.8  | 996.7  |
| 122 | 1001.4 | 1001.3 | 1001.6 | 1001.5 | 1001.5 | 1001.4 | 1001.7 | 1001.6 |
| 123 | 1007.5 | 1006.3 | 1007.2 | 1006.5 | 1006.1 | 1006.9 | 1006.5 | 1005.8 |
| 124 | 1013.1 | 1013.0 | 1013.0 | 1013.1 | 1013.0 | 1012.9 | 1013.3 | 1013.2 |
| 125 | 1024.5 | 1024.3 | 1024.4 | 1024.4 | 1024.4 | 1024.3 | 1024.5 | 1024.2 |
| 126 | 1027.9 | 1027.8 | 1027.9 | 1027.8 | 1027.9 | 1027.4 | 1027.5 | 1027.8 |
| 127 | 1028.3 | 1028.0 | 1028.2 | 1028.6 | 1028.4 | 1027.9 | 1027.8 | 1028.0 |
| 128 | 1040.9 | 1040.8 | 1040.2 | 1040.9 | 1040.9 | 1040.2 | 1040.8 | 1041.0 |
| 129 | 1041.9 | 1042.1 | 1041.1 | 1041.1 | 1040.9 | 1041.1 | 1041.0 | 1041.4 |
| 130 | 1046.6 | 1046.6 | 1046.5 | 1046.5 | 1046.4 | 1046.6 | 1046.6 | 1046.7 |
| 131 | 1076.7 | 1076.7 | 1078.2 | 1077.0 | 1077.1 | 1077.8 | 1076.7 | 1076.8 |
| 132 | 1080.3 | 1080.9 | 1079.5 | 1079.7 | 1079.6 | 1079.5 | 1079.6 | 1080.3 |
| 133 | 1102.2 | 1102.4 | 1102.2 | 1102.3 | 1102.2 | 1102.4 | 1102.2 | 1102.1 |
| 134 | 1116.4 | 1115.5 | 1116.2 | 1116.0 | 1115.9 | 1116.6 | 1116.2 | 1116.4 |
| 135 | 1140.2 | 1140.2 | 1140.5 | 1140.8 | 1141.1 | 1139.5 | 1140.8 | 1140.5 |
| 136 | 1145.1 | 1144.4 | 1146.4 | 1146.6 | 1146.6 | 1143.5 | 1145.7 | 1146.3 |
| 137 | 1146.6 | 1146.8 | 1147.2 | 1147.3 | 1147.4 | 1147.6 | 1147.0 | 1147.3 |
| 138 | 1158.0 | 1158.2 | 1157.9 | 1158.1 | 1158.4 | 1157.9 | 1158.0 | 1158.1 |
| 139 | 1170.3 | 1170.6 | 1168.7 | 1169.1 | 1168.9 | 1168.5 | 1168.2 | 1169.4 |
| 140 | 1175.6 | 1175.8 | 1175.8 | 1175.9 | 1176.1 | 1175.8 | 1175.9 | 1175.8 |
| 141 | 1186.3 | 1186.6 | 1186.6 | 1186.9 | 1186.5 | 1186.6 | 1186.2 | 1186.4 |
| 142 | 1189.4 | 1189.7 | 1189.8 | 1190.2 | 1189.6 | 1189.9 | 1189.2 | 1189.5 |
| 143 | 1194.1 | 1194.2 | 1194.1 | 1194.2 | 1194.2 | 1194.1 | 1194.0 | 1194.0 |
| 144 | 1202.4 | 1202.0 | 1201.3 | 1201.7 | 1201.6 | 1201.2 | 1200.7 | 1201.4 |
| 145 | 1203.7 | 1203.6 | 1203.8 | 1204.0 | 1204.0 | 1203.5 | 1203.9 | 1203.9 |
| 146 | 1218.7 | 1215.8 | 1219.1 | 1219.2 | 1219.4 | 1219.3 | 1218.9 | 1216.0 |
| 147 | 1219.7 | 1219.1 | 1219.7 | 1219.9 | 1219.8 | 1219.8 | 1219.2 | 1219.1 |
| 148 | 1223.6 | 1220.9 | 1223.4 | 1223.6 | 1223.6 | 1222.6 | 1223.4 | 1219.3 |
| 149 | 1249.6 | 1245.5 | 1252.0 | 1252.1 | 1252.3 | 1249.2 | 1251.3 | 1251.4 |
| 150 | 1266.7 | 1263.4 | 1264.2 | 1264.2 | 1264.3 | 1266.1 | 1264.4 | 1258.6 |
| 151 | 1268.9 | 1268.5 | 1268.2 | 1269.1 | 1268.9 | 1268.0 | 1269.2 | 1269.4 |
| 152 | 1272.8 | 1281.3 | 1272.3 | 1271.9 | 1271.8 | 1272.3 | 1272.3 | 1281.2 |
| 153 | 1285.8 | 1286.0 | 1285.3 | 1286.3 | 1285.8 | 1284.8 | 1286.2 | 1285.9 |
| 154 | 1289.4 | 1289.3 | 1289.3 | 1289.2 | 1289.1 | 1289.2 | 1289.7 | 1289.7 |
| 155 | 1291.0 | 1291.5 | 1290.5 | 1291.4 | 1291.3 | 1290.9 | 1291.0 | 1290.6 |
| 156 | 1296.2 | 1296.1 | 1296.7 | 1296.5 | 1296.5 | 1296.2 | 1296.1 | 1296.6 |
| 157 | 1299.9 | 1300.0 | 1300.4 | 1300.5 | 1300.2 | 1300.0 | 1300.1 | 1299.8 |
| 158 | 1303.5 | 1303.0 | 1302.4 | 1302.8 | 1302.8 | 1303.1 | 1302.9 | 1302.7 |
| 159 | 1323.8 | 1324.5 | 1323.6 | 1324.2 | 1324.2 | 1324.6 | 1323.3 | 1323.1 |
| 160 | 1327.0 | 1326.5 | 1325.5 | 1325.7 | 1325.8 | 1326.3 | 1326.1 | 1326.7 |
| 161 | 1332.5 | 1332.8 | 1331.8 | 1331.6 | 1331.8 | 1331.5 | 1331.9 | 1332.2 |
| 162 | 1340.7 | 1340.6 | 1340.6 | 1340.5 | 1340.6 | 1340.5 | 1340.8 | 1340.8 |
| 163 | 1348.4 | 1348.8 | 1348.4 | 1348.6 | 1348.6 | 1348.9 | 1347.8 | 1348.5 |

|     |        |        |        |        |        |        |        |        |
|-----|--------|--------|--------|--------|--------|--------|--------|--------|
| 164 | 1352.4 | 1352.4 | 1351.2 | 1351.4 | 1351.4 | 1351.6 | 1351.3 | 1351.6 |
| 165 | 1356.7 | 1356.2 | 1356.2 | 1356.0 | 1356.1 | 1355.5 | 1356.3 | 1356.7 |
| 166 | 1358.2 | 1358.0 | 1358.5 | 1358.6 | 1358.8 | 1357.7 | 1357.3 | 1357.7 |
| 167 | 1372.0 | 1372.0 | 1372.2 | 1371.7 | 1371.7 | 1371.0 | 1371.4 | 1371.2 |
| 168 | 1373.5 | 1372.9 | 1373.1 | 1372.9 | 1373.1 | 1372.2 | 1372.1 | 1372.6 |
| 169 | 1388.6 | 1388.6 | 1389.0 | 1389.0 | 1388.7 | 1388.8 | 1389.0 | 1389.0 |
| 170 | 1394.9 | 1394.9 | 1394.8 | 1394.8 | 1395.1 | 1394.7 | 1394.6 | 1394.9 |
| 171 | 1409.5 | 1406.4 | 1408.0 | 1407.8 | 1407.6 | 1407.4 | 1407.4 | 1403.7 |
| 172 | 1412.3 | 1420.1 | 1410.6 | 1410.2 | 1410.1 | 1410.6 | 1409.5 | 1418.2 |
| 173 | 1431.1 | 1437.2 | 1429.9 | 1429.8 | 1429.7 | 1429.6 | 1429.9 | 1434.3 |
| 174 | 1441.9 | 1442.2 | 1442.0 | 1442.3 | 1442.1 | 1442.3 | 1442.1 | 1442.0 |
| 175 | 1448.2 | 1444.6 | 1448.7 | 1448.6 | 1448.7 | 1447.8 | 1448.5 | 1445.6 |
| 176 | 1454.1 | 1453.0 | 1454.3 | 1454.1 | 1454.2 | 1453.8 | 1454.2 | 1453.0 |
| 177 | 1458.3 | 1457.3 | 1458.3 | 1458.5 | 1458.5 | 1457.9 | 1458.5 | 1456.9 |
| 178 | 1481.7 | 1464.3 | 1479.9 | 1479.7 | 1479.6 | 1480.1 | 1479.3 | 1462.4 |
| 179 | 1483.2 | 1483.6 | 1483.1 | 1483.4 | 1483.5 | 1483.6 | 1483.3 | 1483.1 |
| 180 | 1488.4 | 1487.7 | 1487.5 | 1488.0 | 1488.0 | 1488.3 | 1487.8 | 1488.3 |
| 181 | 1490.9 | 1490.4 | 1489.7 | 1490.4 | 1490.7 | 1490.9 | 1490.5 | 1490.8 |
| 182 | 1516.5 | 1516.0 | 1515.9 | 1516.1 | 1516.4 | 1516.1 | 1516.1 | 1516.5 |
| 183 | 1519.6 | 1519.9 | 1519.9 | 1519.8 | 1519.8 | 1519.9 | 1519.7 | 1520.0 |
| 184 | 1529.9 | 1533.3 | 1528.9 | 1529.0 | 1528.9 | 1529.4 | 1528.5 | 1531.6 |
| 185 | 1533.6 | 1540.9 | 1535.0 | 1535.1 | 1535.1 | 1533.2 | 1535.2 | 1540.2 |
| 186 | 1541.9 | 1542.8 | 1540.4 | 1540.6 | 1540.6 | 1541.0 | 1540.2 | 1544.8 |
| 187 | 1545.1 | 1544.8 | 1544.7 | 1544.8 | 1544.9 | 1544.8 | 1544.6 | 1545.4 |
| 188 | 1578.0 | 1575.5 | 1579.1 | 1579.0 | 1578.8 | 1577.3 | 1578.4 | 1575.8 |
| 189 | 1584.0 | 1583.7 | 1583.6 | 1583.7 | 1583.8 | 1584.0 | 1583.4 | 1583.1 |
| 190 | 1594.5 | 1593.7 | 1594.0 | 1593.9 | 1594.0 | 1594.0 | 1594.2 | 1594.4 |
| 191 | 1607.4 | 1603.6 | 1607.3 | 1607.2 | 1607.1 | 1607.1 | 1607.3 | 1603.7 |
| 192 | 1618.5 | 1618.7 | 1618.7 | 1618.7 | 1618.8 | 1618.7 | 1618.6 | 1618.5 |
| 193 | 1624.1 | 1623.8 | 1622.3 | 1622.5 | 1622.6 | 1623.6 | 1622.9 | 1623.1 |
| 194 | 1625.8 | 1626.3 | 1623.9 | 1623.9 | 1624.1 | 1625.7 | 1623.8 | 1624.4 |
| 195 | 1628.8 | 1629.6 | 1629.6 | 1629.6 | 1629.5 | 1628.4 | 1629.4 | 1629.9 |
| 196 | 1633.0 | 1632.8 | 1633.1 | 1633.1 | 1633.2 | 1632.7 | 1633.1 | 1633.4 |
| 197 | 1640.3 | 1641.5 | 1639.9 | 1639.8 | 1639.8 | 1639.8 | 1639.7 | 1641.2 |
| 198 | 1644.7 | 1645.6 | 1644.5 | 1644.4 | 1644.4 | 1644.5 | 1644.4 | 1645.4 |
| 199 | 1651.1 | 1651.3 | 1650.6 | 1650.6 | 1650.6 | 1650.8 | 1650.5 | 1650.8 |
| 200 | 1678.1 | 1678.1 | 1679.0 | 1678.8 | 1678.9 | 1678.1 | 1678.7 | 1678.9 |
| 201 | 1764.5 | 1764.4 | 1764.5 | 1764.3 | 1764.2 | 1764.3 | 1764.2 | 1764.3 |
| 202 | 2321.4 | 2321.4 | 2321.1 | 2321.5 | 2321.4 | 2321.3 | 2321.2 | 2321.2 |
| 203 | 3030.0 | 3029.0 | 3029.0 | 3029.6 | 3029.0 | 3029.1 | 3029.1 | 3029.7 |
| 204 | 3040.6 | 3039.8 | 3039.4 | 3040.3 | 3039.7 | 3039.9 | 3040.2 | 3040.3 |
| 205 | 3126.0 | 3125.9 | 3125.4 | 3125.6 | 3125.9 | 3125.4 | 3125.5 | 3126.1 |
| 206 | 3128.7 | 3128.6 | 3127.6 | 3128.5 | 3128.7 | 3127.9 | 3128.2 | 3129.0 |
| 207 | 3135.7 | 3136.0 | 3135.1 | 3134.4 | 3135.0 | 3134.6 | 3135.3 | 3135.4 |
| 208 | 3144.6 | 3143.7 | 3143.9 | 3143.0 | 3143.7 | 3143.3 | 3143.9 | 3143.1 |
| 209 | 3146.8 | 3144.6 | 3146.3 | 3145.2 | 3144.7 | 3144.1 | 3145.2 | 3143.8 |
| 210 | 3162.3 | 3161.5 | 3162.2 | 3161.3 | 3160.4 | 3161.9 | 3160.3 | 3159.2 |

|     |        |        |        |        |        |        |        |        |
|-----|--------|--------|--------|--------|--------|--------|--------|--------|
| 211 | 3163.1 | 3162.5 | 3162.7 | 3162.9 | 3163.1 | 3162.5 | 3162.4 | 3162.7 |
| 212 | 3165.3 | 3165.4 | 3165.4 | 3165.4 | 3165.2 | 3165.3 | 3165.4 | 3165.3 |
| 213 | 3166.6 | 3167.0 | 3169.0 | 3169.2 | 3170.3 | 3166.3 | 3169.7 | 3170.4 |
| 214 | 3170.2 | 3169.9 | 3172.4 | 3172.4 | 3172.2 | 3169.6 | 3172.4 | 3172.3 |
| 215 | 3172.3 | 3172.3 | 3176.1 | 3176.0 | 3176.0 | 3172.3 | 3175.6 | 3175.5 |
| 216 | 3176.3 | 3176.4 | 3177.5 | 3176.3 | 3176.3 | 3175.6 | 3176.6 | 3176.0 |
| 217 | 3178.0 | 3176.8 | 3178.0 | 3177.2 | 3176.9 | 3176.2 | 3176.7 | 3176.2 |
| 218 | 3184.9 | 3184.9 | 3182.4 | 3182.0 | 3182.2 | 3184.9 | 3182.1 | 3182.2 |
| 219 | 3185.7 | 3185.9 | 3184.9 | 3184.8 | 3184.7 | 3185.7 | 3184.8 | 3184.8 |
| 220 | 3190.3 | 3189.7 | 3185.6 | 3185.7 | 3185.5 | 3189.0 | 3185.9 | 3186.0 |
| 221 | 3190.8 | 3190.9 | 3190.8 | 3190.8 | 3190.7 | 3191.0 | 3190.9 | 3190.8 |
| 222 | 3192.3 | 3192.2 | 3192.3 | 3192.2 | 3192.2 | 3192.2 | 3192.3 | 3192.4 |
| 223 | 3192.7 | 3193.0 | 3193.1 | 3193.1 | 3193.1 | 3192.8 | 3193.0 | 3192.9 |
| 224 | 3194.3 | 3194.6 | 3194.3 | 3194.5 | 3194.5 | 3194.3 | 3194.3 | 3194.0 |
| 225 | 3195.3 | 3195.3 | 3195.1 | 3195.3 | 3195.2 | 3195.4 | 3195.3 | 3195.3 |
| 226 | 3195.3 | 3196.2 | 3195.3 | 3195.3 | 3195.5 | 3195.4 | 3195.4 | 3196.9 |
| 227 | 3216.5 | 3216.7 | 3218.9 | 3216.4 | 3216.8 | 3221.6 | 3216.0 | 3216.6 |
| 228 | 3245.7 | 3245.6 | 3244.0 | 3243.7 | 3243.7 | 3245.1 | 3243.8 | 3244.5 |
| 229 | 3255.8 | 3255.7 | 3255.9 | 3256.2 | 3256.0 | 3256.2 | 3255.6 | 3255.9 |
| 230 | 3588.3 | 3587.3 | 3586.6 | 3585.8 | 3584.8 | 3587.7 | 3585.5 | 3586.5 |
| 231 | 3761.4 | 3761.7 | 3761.1 | 3761.4 | 3761.8 | 3761.3 | 3761.3 | 3762.3 |

Table S23. Vibrational frequencies (in  $\text{cm}^{-1}$ ) of ETE-Pyc in toluene and dichloromethane obtained from B3LYP/6-311G(d,p) calculations.

in toluene

| Freq. # | conf1 | conf2 | conf3 | conf6 | conf7 | conf8 | conf9 | conf10 |
|---------|-------|-------|-------|-------|-------|-------|-------|--------|
| 1       | 5.0   | 4.4   | 5.5   | 0.6   | 5.0   | 3.6   | 4.6   | 3.9    |
| 2       | 9.0   | 7.5   | 7.4   | 6.1   | 7.7   | 7.3   | 6.0   | 7.1    |
| 3       | 9.6   | 9.3   | 9.3   | 7.7   | 9.2   | 8.6   | 7.1   | 9.0    |
| 4       | 11.0  | 9.6   | 10.3  | 8.9   | 11.0  | 9.9   | 8.7   | 9.8    |
| 5       | 12.0  | 13.4  | 12.5  | 11.6  | 11.6  | 13.1  | 12.2  | 10.9   |
| 6       | 16.3  | 14.1  | 13.6  | 14.3  | 14.7  | 14.3  | 13.3  | 14.5   |
| 7       | 16.9  | 17.2  | 15.3  | 15.3  | 16.5  | 16.0  | 18.5  | 15.7   |
| 8       | 24.0  | 22.4  | 24.7  | 22.4  | 24.1  | 21.6  | 22.0  | 23.9   |
| 9       | 29.4  | 28.1  | 29.9  | 30.8  | 31.7  | 27.9  | 29.8  | 25.3   |
| 10      | 33.7  | 33.7  | 33.6  | 33.3  | 34.4  | 32.6  | 33.1  | 32.2   |
| 11      | 38.3  | 39.2  | 40.4  | 35.1  | 37.4  | 35.6  | 39.7  | 40.0   |
| 12      | 48.4  | 44.4  | 42.3  | 44.7  | 43.2  | 45.2  | 42.7  | 45.3   |
| 13      | 54.3  | 52.7  | 54.6  | 54.5  | 55.0  | 50.9  | 52.0  | 53.5   |
| 14      | 59.4  | 53.4  | 57.4  | 57.2  | 57.8  | 51.8  | 53.6  | 54.4   |
| 15      | 61.5  | 57.5  | 61.8  | 59.8  | 63.1  | 58.8  | 60.1  | 60.7   |
| 16      | 64.8  | 62.6  | 62.8  | 60.6  | 63.5  | 63.4  | 61.1  | 63.2   |
| 17      | 67.8  | 65.4  | 66.4  | 66.1  | 66.8  | 65.9  | 67.5  | 66.9   |
| 18      | 73.6  | 73.9  | 70.6  | 71.0  | 71.9  | 70.2  | 72.9  | 73.3   |

|    |       |       |       |       |       |       |       |       |
|----|-------|-------|-------|-------|-------|-------|-------|-------|
| 19 | 74.5  | 76.7  | 73.3  | 75.6  | 75.0  | 77.3  | 75.9  | 75.8  |
| 20 | 81.2  | 84.2  | 84.3  | 84.3  | 84.1  | 84.9  | 85.0  | 80.7  |
| 21 | 89.0  | 87.9  | 87.4  | 87.8  | 86.3  | 89.0  | 89.8  | 87.6  |
| 22 | 90.2  | 93.4  | 96.6  | 93.6  | 94.0  | 94.6  | 95.2  | 90.1  |
| 23 | 98.0  | 96.8  | 101.5 | 99.3  | 100.0 | 98.3  | 97.5  | 96.5  |
| 24 | 112.1 | 111.4 | 110.6 | 111.3 | 110.4 | 111.1 | 110.3 | 110.6 |
| 25 | 112.7 | 113.3 | 110.8 | 112.4 | 112.6 | 112.6 | 112.4 | 112.4 |
| 26 | 115.7 | 126.2 | 116.1 | 124.5 | 115.6 | 124.3 | 126.1 | 126.7 |
| 27 | 140.3 | 139.5 | 136.9 | 134.7 | 139.7 | 139.0 | 143.3 | 139.9 |
| 28 | 148.7 | 148.1 | 146.5 | 149.7 | 144.9 | 145.2 | 146.0 | 146.0 |
| 29 | 152.6 | 149.8 | 149.5 | 151.9 | 150.4 | 149.9 | 150.6 | 148.8 |
| 30 | 157.5 | 154.0 | 156.9 | 154.1 | 156.8 | 153.5 | 153.2 | 156.6 |
| 31 | 175.5 | 173.4 | 168.1 | 173.0 | 171.2 | 170.5 | 172.6 | 175.2 |
| 32 | 177.6 | 178.5 | 173.5 | 175.6 | 181.0 | 180.2 | 178.4 | 177.8 |
| 33 | 192.0 | 187.1 | 194.6 | 193.6 | 191.8 | 189.9 | 183.8 | 192.6 |
| 34 | 200.9 | 208.6 | 209.6 | 210.0 | 210.0 | 211.1 | 209.7 | 203.5 |
| 35 | 211.6 | 214.0 | 220.8 | 213.1 | 216.7 | 218.8 | 221.7 | 211.8 |
| 36 | 224.7 | 225.6 | 223.0 | 223.8 | 223.3 | 225.2 | 230.4 | 220.5 |
| 37 | 241.8 | 239.7 | 240.0 | 230.1 | 230.7 | 238.4 | 233.8 | 241.8 |
| 38 | 251.5 | 257.1 | 250.6 | 251.4 | 251.5 | 248.8 | 258.3 | 248.1 |
| 39 | 267.7 | 268.1 | 273.4 | 270.6 | 274.8 | 266.6 | 265.8 | 264.3 |
| 40 | 276.6 | 276.9 | 277.2 | 275.1 | 276.8 | 277.2 | 276.3 | 276.0 |
| 41 | 282.2 | 284.7 | 277.7 | 278.7 | 280.5 | 284.6 | 280.2 | 283.4 |
| 42 | 298.2 | 289.4 | 284.9 | 291.0 | 289.6 | 288.5 | 288.4 | 299.9 |
| 43 | 303.3 | 303.5 | 302.6 | 303.9 | 305.1 | 302.6 | 301.2 | 304.9 |
| 44 | 316.9 | 308.2 | 311.7 | 313.8 | 310.2 | 311.6 | 310.8 | 316.3 |
| 45 | 329.5 | 327.6 | 333.5 | 333.6 | 331.4 | 329.7 | 326.9 | 330.8 |
| 46 | 331.1 | 333.5 | 334.6 | 334.3 | 335.1 | 334.2 | 333.7 | 334.3 |
| 47 | 339.2 | 336.4 | 337.1 | 343.3 | 338.7 | 337.1 | 337.9 | 335.5 |
| 48 | 343.2 | 340.8 | 346.2 | 349.0 | 342.4 | 345.3 | 343.6 | 342.2 |
| 49 | 358.7 | 360.2 | 360.5 | 356.5 | 363.8 | 351.6 | 359.3 | 360.1 |
| 50 | 368.4 | 366.7 | 372.6 | 360.8 | 372.1 | 369.5 | 371.3 | 365.5 |
| 51 | 380.7 | 382.8 | 377.7 | 374.0 | 374.3 | 377.0 | 374.0 | 374.8 |
| 52 | 384.0 | 384.4 | 386.2 | 384.7 | 384.1 | 385.6 | 388.4 | 383.9 |
| 53 | 394.9 | 396.2 | 392.0 | 400.1 | 398.7 | 395.7 | 395.6 | 393.4 |
| 54 | 403.5 | 400.6 | 400.9 | 404.1 | 402.7 | 402.1 | 396.7 | 405.5 |
| 55 | 406.2 | 404.8 | 407.1 | 406.6 | 407.4 | 404.6 | 406.3 | 409.9 |
| 56 | 416.9 | 417.8 | 414.0 | 416.4 | 410.1 | 418.2 | 418.3 | 416.7 |
| 57 | 418.4 | 419.7 | 418.1 | 418.0 | 418.3 | 418.5 | 419.2 | 417.1 |
| 58 | 419.9 | 419.9 | 419.0 | 419.0 | 418.9 | 421.0 | 420.7 | 419.7 |
| 59 | 422.5 | 421.5 | 421.1 | 420.8 | 421.4 | 424.1 | 424.0 | 421.3 |
| 60 | 426.1 | 425.1 | 425.0 | 424.4 | 424.9 | 425.8 | 425.2 | 425.1 |
| 61 | 431.2 | 427.4 | 427.1 | 427.0 | 428.5 | 426.9 | 426.4 | 426.0 |
| 62 | 438.5 | 438.8 | 437.0 | 437.3 | 437.5 | 437.3 | 437.6 | 438.4 |
| 63 | 438.9 | 440.3 | 440.9 | 440.2 | 440.6 | 440.3 | 440.4 | 439.8 |
| 64 | 444.0 | 442.7 | 444.2 | 443.3 | 443.9 | 441.7 | 442.9 | 444.2 |
| 65 | 449.5 | 449.9 | 446.5 | 443.8 | 447.0 | 444.7 | 444.4 | 449.6 |

|     |       |       |       |       |       |       |       |       |
|-----|-------|-------|-------|-------|-------|-------|-------|-------|
| 66  | 451.5 | 453.2 | 455.1 | 451.6 | 451.1 | 452.9 | 453.9 | 450.6 |
| 67  | 467.2 | 464.8 | 466.2 | 472.8 | 470.7 | 470.3 | 470.5 | 466.7 |
| 68  | 486.2 | 487.2 | 486.2 | 489.3 | 487.5 | 487.3 | 486.9 | 486.6 |
| 69  | 500.9 | 501.8 | 501.0 | 501.6 | 502.3 | 501.4 | 502.3 | 501.5 |
| 70  | 505.8 | 506.0 | 505.2 | 505.8 | 506.0 | 505.9 | 506.5 | 506.3 |
| 71  | 510.5 | 509.9 | 509.6 | 506.1 | 508.1 | 508.1 | 507.1 | 510.0 |
| 72  | 515.7 | 515.9 | 516.1 | 514.9 | 515.3 | 515.7 | 515.8 | 515.5 |
| 73  | 524.0 | 522.6 | 523.2 | 521.9 | 523.6 | 522.6 | 522.6 | 522.0 |
| 74  | 532.9 | 533.5 | 533.8 | 533.3 | 533.4 | 533.6 | 533.4 | 533.3 |
| 75  | 535.3 | 534.3 | 534.7 | 535.8 | 534.7 | 534.4 | 534.1 | 534.9 |
| 76  | 543.4 | 548.2 | 547.0 | 544.0 | 547.0 | 547.0 | 547.5 | 545.0 |
| 77  | 549.2 | 548.5 | 548.6 | 547.2 | 548.4 | 548.6 | 548.7 | 548.4 |
| 78  | 551.6 | 548.8 | 549.9 | 549.6 | 550.2 | 551.2 | 550.3 | 551.0 |
| 79  | 554.4 | 553.2 | 553.3 | 553.1 | 553.7 | 553.7 | 553.3 | 553.2 |
| 80  | 568.9 | 569.0 | 568.6 | 568.3 | 569.6 | 569.3 | 569.4 | 569.2 |
| 81  | 572.0 | 570.5 | 571.1 | 571.9 | 569.9 | 570.3 | 570.1 | 570.9 |
| 82  | 584.5 | 589.2 | 584.3 | 585.0 | 585.0 | 589.2 | 589.1 | 585.2 |
| 83  | 631.9 | 631.1 | 631.4 | 631.2 | 631.8 | 631.2 | 631.3 | 631.3 |
| 84  | 633.9 | 631.7 | 633.9 | 635.1 | 634.2 | 631.8 | 631.5 | 634.5 |
| 85  | 644.3 | 642.7 | 644.6 | 645.0 | 644.5 | 643.2 | 643.3 | 644.1 |
| 86  | 645.9 | 645.5 | 646.4 | 646.5 | 646.8 | 645.9 | 646.1 | 645.7 |
| 87  | 651.5 | 650.4 | 652.0 | 651.7 | 651.8 | 650.7 | 650.5 | 651.5 |
| 88  | 653.6 | 654.1 | 653.9 | 653.9 | 653.7 | 654.0 | 654.2 | 653.9 |
| 89  | 657.0 | 656.7 | 657.1 | 658.0 | 656.9 | 656.7 | 656.9 | 658.0 |
| 90  | 666.3 | 666.8 | 666.7 | 665.6 | 667.1 | 667.1 | 666.2 | 666.5 |
| 91  | 668.1 | 676.8 | 675.9 | 674.3 | 674.1 | 669.8 | 672.0 | 673.8 |
| 92  | 675.9 | 678.4 | 676.6 | 681.1 | 675.7 | 678.2 | 678.6 | 674.3 |
| 93  | 684.6 | 684.8 | 685.4 | 684.9 | 684.6 | 684.5 | 684.9 | 685.5 |
| 94  | 687.0 | 686.1 | 685.8 | 685.3 | 686.2 | 685.8 | 685.8 | 685.9 |
| 95  | 706.1 | 701.8 | 705.4 | 706.2 | 705.8 | 701.7 | 701.9 | 706.0 |
| 96  | 712.5 | 706.7 | 712.0 | 711.7 | 712.2 | 706.8 | 706.5 | 712.3 |
| 97  | 712.8 | 712.3 | 712.7 | 712.3 | 712.4 | 711.8 | 712.0 | 712.4 |
| 98  | 714.3 | 712.8 | 714.5 | 712.5 | 714.3 | 712.7 | 713.0 | 712.9 |
| 99  | 714.5 | 715.6 | 715.9 | 716.0 | 715.4 | 715.2 | 716.0 | 715.3 |
| 100 | 726.3 | 726.2 | 726.5 | 726.3 | 726.4 | 726.2 | 726.4 | 726.0 |
| 101 | 737.0 | 735.9 | 736.6 | 735.5 | 736.7 | 735.9 | 735.5 | 736.2 |
| 102 | 743.6 | 743.4 | 743.3 | 742.9 | 743.1 | 743.0 | 743.3 | 743.4 |
| 103 | 749.4 | 749.5 | 749.2 | 748.8 | 749.0 | 749.1 | 749.0 | 749.3 |
| 104 | 749.8 | 749.7 | 749.9 | 749.3 | 749.8 | 749.5 | 749.9 | 749.7 |
| 105 | 781.9 | 784.3 | 782.6 | 783.1 | 781.7 | 784.1 | 783.9 | 783.3 |
| 106 | 784.7 | 797.6 | 783.9 | 784.2 | 784.2 | 798.0 | 797.8 | 783.8 |
| 107 | 816.7 | 816.2 | 817.0 | 816.4 | 816.6 | 816.5 | 816.5 | 816.4 |
| 108 | 822.2 | 819.0 | 822.0 | 821.5 | 822.4 | 820.6 | 819.3 | 820.0 |
| 109 | 823.4 | 821.5 | 824.7 | 824.6 | 824.3 | 821.2 | 821.0 | 824.9 |
| 110 | 829.1 | 829.6 | 828.5 | 830.3 | 829.0 | 829.6 | 829.3 | 830.6 |
| 111 | 830.5 | 832.0 | 831.0 | 833.6 | 831.7 | 832.6 | 833.8 | 831.1 |
| 112 | 833.8 | 834.3 | 834.1 | 835.7 | 833.9 | 834.4 | 834.8 | 835.3 |

|     |        |        |        |        |        |        |        |        |
|-----|--------|--------|--------|--------|--------|--------|--------|--------|
| 113 | 835.3  | 837.2  | 835.8  | 836.1  | 835.4  | 836.9  | 836.7  | 837.3  |
| 114 | 837.5  | 838.9  | 837.8  | 837.3  | 836.7  | 838.3  | 838.3  | 839.0  |
| 115 | 839.1  | 839.7  | 839.1  | 840.2  | 838.8  | 840.1  | 840.1  | 839.5  |
| 116 | 846.2  | 846.2  | 847.4  | 849.0  | 847.0  | 846.1  | 846.4  | 847.1  |
| 117 | 849.5  | 849.7  | 849.1  | 849.2  | 850.4  | 849.6  | 849.1  | 850.0  |
| 118 | 850.6  | 850.4  | 852.0  | 851.9  | 851.5  | 850.9  | 851.3  | 850.9  |
| 119 | 856.1  | 855.7  | 856.0  | 854.4  | 855.8  | 855.2  | 855.3  | 854.2  |
| 120 | 858.3  | 857.4  | 857.1  | 855.7  | 856.9  | 855.8  | 856.2  | 857.3  |
| 121 | 859.3  | 858.8  | 858.2  | 857.5  | 858.1  | 859.0  | 858.6  | 858.8  |
| 122 | 866.9  | 868.8  | 866.9  | 866.8  | 866.9  | 868.9  | 869.0  | 866.6  |
| 123 | 887.8  | 884.2  | 887.9  | 884.5  | 887.9  | 884.5  | 884.9  | 884.5  |
| 124 | 894.6  | 890.7  | 894.5  | 890.6  | 894.7  | 890.8  | 890.7  | 890.0  |
| 125 | 912.6  | 912.5  | 913.2  | 912.5  | 912.1  | 912.3  | 912.5  | 912.4  |
| 126 | 913.1  | 913.1  | 913.4  | 913.3  | 913.4  | 913.3  | 913.0  | 913.0  |
| 127 | 931.3  | 930.7  | 930.4  | 929.9  | 930.4  | 930.3  | 930.0  | 930.9  |
| 128 | 931.5  | 931.3  | 931.4  | 931.0  | 931.0  | 931.3  | 931.6  | 931.4  |
| 129 | 935.5  | 936.0  | 935.8  | 936.3  | 936.1  | 936.2  | 935.8  | 935.7  |
| 130 | 935.8  | 936.2  | 936.3  | 936.8  | 936.5  | 936.5  | 936.3  | 936.3  |
| 131 | 937.8  | 937.8  | 938.1  | 937.5  | 937.7  | 937.4  | 937.7  | 938.1  |
| 132 | 952.3  | 953.1  | 953.3  | 955.9  | 953.4  | 954.5  | 953.5  | 954.1  |
| 133 | 963.1  | 963.8  | 954.5  | 959.4  | 959.7  | 962.3  | 960.3  | 955.6  |
| 134 | 967.5  | 965.8  | 963.6  | 963.7  | 963.4  | 963.9  | 964.0  | 964.1  |
| 135 | 968.3  | 967.5  | 967.3  | 967.1  | 967.2  | 966.6  | 967.7  | 967.8  |
| 136 | 968.9  | 968.6  | 968.2  | 968.7  | 968.5  | 968.9  | 968.9  | 968.8  |
| 137 | 973.4  | 974.0  | 974.1  | 974.2  | 973.7  | 974.1  | 974.4  | 973.9  |
| 138 | 980.4  | 980.5  | 980.9  | 980.7  | 980.8  | 980.6  | 980.3  | 980.5  |
| 139 | 981.2  | 981.5  | 981.4  | 981.3  | 981.4  | 981.4  | 981.3  | 981.5  |
| 140 | 982.2  | 981.8  | 982.1  | 981.9  | 981.8  | 982.0  | 982.2  | 981.7  |
| 141 | 982.3  | 982.5  | 982.3  | 982.3  | 982.1  | 982.5  | 982.7  | 982.2  |
| 142 | 985.5  | 986.8  | 985.5  | 984.6  | 985.5  | 986.4  | 986.6  | 984.4  |
| 143 | 995.1  | 995.4  | 994.6  | 995.3  | 995.1  | 995.4  | 995.4  | 995.4  |
| 144 | 995.9  | 996.9  | 995.8  | 996.4  | 996.0  | 996.8  | 997.0  | 996.2  |
| 145 | 1005.6 | 1005.4 | 1005.9 | 1004.7 | 1005.7 | 1005.4 | 1004.4 | 1005.2 |
| 146 | 1025.2 | 1025.6 | 1025.2 | 1025.3 | 1025.3 | 1025.0 | 1025.1 | 1025.3 |
| 147 | 1028.4 | 1029.0 | 1028.9 | 1029.1 | 1028.9 | 1028.8 | 1027.9 | 1029.0 |
| 148 | 1029.1 | 1029.2 | 1029.3 | 1029.3 | 1029.1 | 1029.0 | 1029.2 | 1029.5 |
| 149 | 1029.8 | 1029.5 | 1029.6 | 1029.6 | 1029.7 | 1029.6 | 1029.6 | 1029.8 |
| 150 | 1041.7 | 1041.8 | 1042.3 | 1040.9 | 1041.6 | 1042.5 | 1042.0 | 1040.6 |
| 151 | 1044.4 | 1044.1 | 1044.3 | 1044.2 | 1044.2 | 1044.2 | 1044.2 | 1044.3 |
| 152 | 1045.1 | 1044.9 | 1044.8 | 1044.9 | 1044.8 | 1044.7 | 1044.9 | 1045.0 |
| 153 | 1075.5 | 1076.5 | 1075.5 | 1075.3 | 1075.5 | 1076.5 | 1076.5 | 1075.3 |
| 154 | 1082.1 | 1082.2 | 1083.4 | 1082.3 | 1082.5 | 1082.2 | 1082.3 | 1082.3 |
| 155 | 1082.4 | 1083.7 | 1084.0 | 1083.4 | 1083.7 | 1083.5 | 1083.6 | 1083.5 |
| 156 | 1117.1 | 1117.4 | 1117.9 | 1117.4 | 1117.3 | 1117.0 | 1117.1 | 1117.0 |
| 157 | 1117.1 | 1117.7 | 1118.1 | 1118.2 | 1118.0 | 1118.0 | 1117.8 | 1117.8 |
| 158 | 1140.9 | 1142.1 | 1141.3 | 1141.9 | 1141.2 | 1141.7 | 1142.0 | 1142.2 |
| 159 | 1145.0 | 1147.7 | 1145.8 | 1148.1 | 1145.7 | 1147.8 | 1147.3 | 1147.3 |

|     |        |        |        |        |        |        |        |        |
|-----|--------|--------|--------|--------|--------|--------|--------|--------|
| 160 | 1147.2 | 1148.8 | 1148.2 | 1148.8 | 1147.8 | 1148.9 | 1148.3 | 1148.6 |
| 161 | 1148.7 | 1149.2 | 1149.1 | 1149.6 | 1149.0 | 1149.5 | 1149.5 | 1149.0 |
| 162 | 1159.4 | 1159.2 | 1159.4 | 1159.5 | 1159.4 | 1159.3 | 1159.1 | 1159.2 |
| 163 | 1160.3 | 1160.1 | 1160.0 | 1160.2 | 1160.1 | 1160.2 | 1159.8 | 1160.0 |
| 164 | 1172.4 | 1173.5 | 1172.6 | 1172.9 | 1172.4 | 1174.2 | 1173.5 | 1172.3 |
| 165 | 1187.6 | 1187.7 | 1187.9 | 1187.6 | 1187.6 | 1187.7 | 1187.8 | 1187.8 |
| 166 | 1190.5 | 1190.6 | 1190.8 | 1190.3 | 1190.7 | 1191.0 | 1190.7 | 1190.8 |
| 167 | 1192.2 | 1192.2 | 1192.5 | 1192.0 | 1192.3 | 1192.4 | 1192.3 | 1192.4 |
| 168 | 1201.9 | 1202.3 | 1202.2 | 1201.9 | 1202.4 | 1201.9 | 1201.0 | 1202.1 |
| 169 | 1203.6 | 1204.7 | 1204.1 | 1204.2 | 1204.0 | 1204.5 | 1204.0 | 1204.5 |
| 170 | 1208.5 | 1209.2 | 1209.3 | 1209.6 | 1209.0 | 1209.2 | 1209.5 | 1208.9 |
| 171 | 1219.9 | 1216.2 | 1219.9 | 1220.9 | 1219.9 | 1216.3 | 1216.0 | 1221.0 |
| 172 | 1222.7 | 1220.9 | 1223.8 | 1223.7 | 1223.4 | 1221.0 | 1220.7 | 1223.7 |
| 173 | 1226.0 | 1226.5 | 1226.7 | 1226.9 | 1226.4 | 1226.5 | 1226.6 | 1226.2 |
| 174 | 1250.4 | 1253.3 | 1249.9 | 1253.7 | 1250.5 | 1252.2 | 1252.1 | 1253.5 |
| 175 | 1267.7 | 1259.6 | 1267.1 | 1266.3 | 1267.9 | 1259.2 | 1259.0 | 1266.5 |
| 176 | 1269.2 | 1269.5 | 1269.3 | 1269.4 | 1269.1 | 1269.0 | 1268.8 | 1269.2 |
| 177 | 1269.8 | 1269.5 | 1269.8 | 1269.7 | 1269.3 | 1269.4 | 1269.5 | 1269.2 |
| 178 | 1272.6 | 1281.5 | 1273.2 | 1272.6 | 1272.7 | 1281.8 | 1281.5 | 1272.6 |
| 179 | 1286.0 | 1285.5 | 1284.7 | 1285.0 | 1285.3 | 1285.3 | 1285.1 | 1285.5 |
| 180 | 1288.0 | 1287.4 | 1286.9 | 1287.4 | 1287.3 | 1287.4 | 1287.5 | 1287.5 |
| 181 | 1290.5 | 1290.4 | 1290.1 | 1290.3 | 1290.1 | 1290.4 | 1290.2 | 1290.3 |
| 182 | 1293.6 | 1294.5 | 1295.2 | 1294.7 | 1293.8 | 1294.5 | 1294.4 | 1293.9 |
| 183 | 1295.6 | 1295.3 | 1296.3 | 1295.5 | 1295.6 | 1295.3 | 1295.0 | 1295.3 |
| 184 | 1297.9 | 1298.2 | 1298.5 | 1297.8 | 1297.8 | 1298.2 | 1297.5 | 1297.9 |
| 185 | 1302.4 | 1301.3 | 1301.3 | 1301.4 | 1301.4 | 1300.7 | 1301.0 | 1302.3 |
| 186 | 1303.6 | 1303.2 | 1303.6 | 1303.6 | 1303.6 | 1303.3 | 1303.2 | 1303.6 |
| 187 | 1321.3 | 1321.2 | 1321.2 | 1321.5 | 1321.3 | 1321.2 | 1321.3 | 1321.0 |
| 188 | 1325.8 | 1325.7 | 1325.9 | 1324.7 | 1325.8 | 1325.6 | 1325.5 | 1324.8 |
| 189 | 1330.7 | 1331.5 | 1330.8 | 1331.1 | 1330.8 | 1331.4 | 1331.4 | 1331.0 |
| 190 | 1333.3 | 1333.7 | 1333.5 | 1333.4 | 1333.4 | 1333.5 | 1333.5 | 1333.5 |
| 191 | 1348.8 | 1349.1 | 1348.9 | 1348.6 | 1348.9 | 1348.9 | 1349.2 | 1348.4 |
| 192 | 1351.9 | 1352.4 | 1352.0 | 1352.2 | 1352.1 | 1352.4 | 1352.3 | 1351.9 |
| 193 | 1352.2 | 1352.8 | 1352.5 | 1352.7 | 1352.3 | 1352.9 | 1352.5 | 1352.2 |
| 194 | 1358.5 | 1360.3 | 1357.5 | 1360.9 | 1358.8 | 1358.7 | 1358.2 | 1360.8 |
| 195 | 1370.6 | 1370.9 | 1370.8 | 1371.1 | 1370.6 | 1371.3 | 1371.0 | 1370.0 |
| 196 | 1372.5 | 1373.7 | 1372.2 | 1373.8 | 1372.6 | 1373.1 | 1372.6 | 1373.9 |
| 197 | 1390.6 | 1390.9 | 1391.0 | 1390.9 | 1391.1 | 1390.9 | 1390.7 | 1390.7 |
| 198 | 1390.9 | 1391.8 | 1392.0 | 1391.6 | 1391.5 | 1391.5 | 1392.0 | 1391.1 |
| 199 | 1394.1 | 1394.3 | 1395.1 | 1394.5 | 1393.5 | 1393.7 | 1393.5 | 1393.5 |
| 200 | 1395.1 | 1394.6 | 1395.3 | 1394.9 | 1395.2 | 1394.8 | 1393.7 | 1394.6 |
| 201 | 1407.8 | 1405.3 | 1407.7 | 1406.9 | 1407.4 | 1405.6 | 1405.4 | 1405.7 |
| 202 | 1408.9 | 1418.9 | 1410.3 | 1409.9 | 1409.7 | 1419.2 | 1418.5 | 1409.8 |
| 203 | 1430.4 | 1435.5 | 1431.0 | 1430.0 | 1430.4 | 1436.3 | 1435.8 | 1429.6 |
| 204 | 1440.7 | 1441.0 | 1440.7 | 1440.8 | 1440.8 | 1440.9 | 1440.7 | 1440.9 |
| 205 | 1446.6 | 1447.3 | 1448.1 | 1447.9 | 1447.2 | 1447.2 | 1447.7 | 1446.6 |
| 206 | 1450.4 | 1448.0 | 1450.1 | 1450.9 | 1450.2 | 1448.1 | 1447.9 | 1451.5 |

|     |        |        |        |        |        |        |        |        |
|-----|--------|--------|--------|--------|--------|--------|--------|--------|
| 207 | 1455.7 | 1454.8 | 1455.3 | 1455.5 | 1455.7 | 1455.0 | 1454.4 | 1455.6 |
| 208 | 1458.5 | 1458.1 | 1458.2 | 1458.2 | 1458.1 | 1458.0 | 1458.1 | 1458.4 |
| 209 | 1460.5 | 1458.7 | 1460.3 | 1460.5 | 1460.4 | 1458.8 | 1458.5 | 1460.9 |
| 210 | 1480.0 | 1464.5 | 1480.8 | 1479.6 | 1480.3 | 1464.6 | 1464.0 | 1479.4 |
| 211 | 1489.1 | 1489.4 | 1489.6 | 1489.9 | 1489.5 | 1489.1 | 1489.5 | 1489.5 |
| 212 | 1489.5 | 1489.9 | 1489.9 | 1490.3 | 1489.8 | 1490.0 | 1489.7 | 1489.6 |
| 213 | 1492.2 | 1492.1 | 1492.3 | 1492.4 | 1492.1 | 1492.4 | 1492.1 | 1492.2 |
| 214 | 1492.6 | 1492.7 | 1492.8 | 1492.9 | 1492.3 | 1492.6 | 1492.6 | 1492.5 |
| 215 | 1517.1 | 1517.4 | 1517.2 | 1517.5 | 1517.4 | 1517.5 | 1517.4 | 1516.9 |
| 216 | 1518.5 | 1517.9 | 1518.0 | 1518.5 | 1518.2 | 1518.0 | 1518.3 | 1518.4 |
| 217 | 1533.3 | 1532.9 | 1533.9 | 1531.3 | 1533.7 | 1532.6 | 1532.5 | 1531.0 |
| 218 | 1536.4 | 1541.6 | 1536.5 | 1539.6 | 1536.4 | 1541.6 | 1541.1 | 1539.5 |
| 219 | 1541.9 | 1542.5 | 1542.1 | 1542.2 | 1542.4 | 1542.5 | 1542.2 | 1542.1 |
| 220 | 1542.6 | 1548.0 | 1542.5 | 1542.3 | 1542.5 | 1548.0 | 1548.1 | 1542.4 |
| 221 | 1548.3 | 1550.5 | 1548.3 | 1548.5 | 1548.3 | 1550.5 | 1550.5 | 1548.2 |
| 222 | 1577.9 | 1577.8 | 1578.2 | 1579.4 | 1578.2 | 1577.9 | 1577.5 | 1579.4 |
| 223 | 1581.6 | 1580.8 | 1581.7 | 1582.1 | 1581.8 | 1580.7 | 1580.6 | 1582.0 |
| 224 | 1594.3 | 1594.3 | 1594.5 | 1594.7 | 1594.4 | 1594.4 | 1594.6 | 1594.3 |
| 225 | 1595.8 | 1595.6 | 1595.6 | 1595.5 | 1595.9 | 1595.4 | 1595.2 | 1595.7 |
| 226 | 1613.1 | 1609.3 | 1613.4 | 1613.5 | 1613.2 | 1609.2 | 1609.1 | 1613.4 |
| 227 | 1625.5 | 1625.0 | 1625.3 | 1624.8 | 1625.4 | 1624.8 | 1625.1 | 1624.5 |
| 228 | 1625.6 | 1625.7 | 1625.5 | 1625.3 | 1625.8 | 1625.7 | 1625.6 | 1625.4 |
| 229 | 1627.9 | 1626.2 | 1627.9 | 1626.1 | 1628.1 | 1626.2 | 1626.0 | 1626.2 |
| 230 | 1630.4 | 1633.1 | 1630.7 | 1632.2 | 1630.8 | 1632.9 | 1632.5 | 1632.3 |
| 231 | 1639.2 | 1639.3 | 1639.4 | 1639.6 | 1639.4 | 1639.3 | 1639.4 | 1639.2 |
| 232 | 1641.4 | 1643.2 | 1641.5 | 1641.3 | 1641.5 | 1643.2 | 1642.9 | 1641.3 |
| 233 | 1646.9 | 1647.7 | 1647.1 | 1647.1 | 1647.1 | 1647.8 | 1647.7 | 1646.8 |
| 234 | 1652.8 | 1652.8 | 1652.8 | 1652.5 | 1652.9 | 1652.8 | 1652.6 | 1652.6 |
| 235 | 1679.6 | 1680.8 | 1679.5 | 1680.8 | 1679.8 | 1680.6 | 1680.4 | 1680.7 |
| 236 | 1783.4 | 1783.1 | 1783.3 | 1783.4 | 1783.3 | 1783.2 | 1782.9 | 1783.2 |
| 237 | 2326.1 | 2325.8 | 2326.1 | 2326.0 | 2326.2 | 2325.6 | 2326.0 | 2326.1 |
| 238 | 3022.4 | 3022.6 | 3022.3 | 3022.6 | 3022.8 | 3022.2 | 3022.6 | 3022.2 |
| 239 | 3022.6 | 3022.7 | 3022.7 | 3023.3 | 3023.1 | 3023.0 | 3022.7 | 3022.4 |
| 240 | 3034.1 | 3033.9 | 3033.7 | 3034.4 | 3034.3 | 3034.1 | 3033.9 | 3033.7 |
| 241 | 3034.2 | 3034.6 | 3034.1 | 3034.6 | 3034.4 | 3034.5 | 3034.2 | 3033.7 |
| 242 | 3118.2 | 3118.6 | 3118.8 | 3119.1 | 3118.8 | 3117.8 | 3118.3 | 3119.1 |
| 243 | 3118.8 | 3119.5 | 3119.1 | 3119.5 | 3119.7 | 3118.9 | 3119.0 | 3119.7 |
| 244 | 3120.9 | 3121.1 | 3120.3 | 3120.8 | 3120.7 | 3120.9 | 3119.9 | 3120.6 |
| 245 | 3122.0 | 3121.3 | 3120.7 | 3121.3 | 3121.2 | 3122.4 | 3121.6 | 3121.7 |
| 246 | 3134.2 | 3134.5 | 3133.8 | 3134.1 | 3134.4 | 3134.5 | 3134.8 | 3134.3 |
| 247 | 3137.6 | 3135.2 | 3141.2 | 3136.5 | 3136.6 | 3138.0 | 3136.5 | 3137.0 |
| 248 | 3143.6 | 3143.2 | 3143.6 | 3143.0 | 3143.8 | 3143.1 | 3143.5 | 3143.3 |
| 249 | 3156.0 | 3156.9 | 3158.1 | 3156.7 | 3156.6 | 3156.6 | 3155.1 | 3157.3 |
| 250 | 3161.1 | 3161.4 | 3161.0 | 3161.0 | 3161.5 | 3161.1 | 3161.8 | 3161.0 |
| 251 | 3165.8 | 3168.5 | 3165.5 | 3169.0 | 3165.9 | 3168.8 | 3168.8 | 3168.9 |
| 252 | 3169.3 | 3169.0 | 3168.4 | 3169.6 | 3168.6 | 3169.3 | 3169.0 | 3169.4 |
| 253 | 3169.5 | 3171.9 | 3168.5 | 3172.2 | 3169.7 | 3173.5 | 3172.7 | 3173.2 |



|     |        |        |        |        |        |        |        |        |
|-----|--------|--------|--------|--------|--------|--------|--------|--------|
| 254 | 3172.4 | 3174.4 | 3174.0 | 3174.5 | 3171.2 | 3174.4 | 3174.2 | 3174.9 |
| 255 | 3175.6 | 3175.7 | 3175.9 | 3175.7 | 3175.8 | 3175.1 | 3175.0 | 3175.8 |
| 256 | 3184.9 | 3183.2 | 3185.4 | 3181.9 | 3185.3 | 3183.1 | 3182.9 | 3181.7 |
| 257 | 3185.1 | 3185.1 | 3185.6 | 3185.3 | 3185.3 | 3185.0 | 3185.3 | 3184.7 |
| 258 | 3188.5 | 3185.4 | 3188.3 | 3185.5 | 3188.7 | 3185.4 | 3185.6 | 3185.0 |
| 259 | 3191.9 | 3191.7 | 3191.5 | 3191.7 | 3191.5 | 3191.8 | 3191.6 | 3192.0 |
| 260 | 3192.0 | 3192.1 | 3191.7 | 3191.9 | 3192.3 | 3192.1 | 3191.9 | 3192.1 |
| 261 | 3193.2 | 3192.9 | 3193.1 | 3192.9 | 3193.0 | 3192.9 | 3193.1 | 3193.2 |
| 262 | 3194.5 | 3194.1 | 3194.4 | 3194.2 | 3194.4 | 3194.0 | 3194.2 | 3194.5 |
| 263 | 3194.9 | 3196.7 | 3195.0 | 3195.0 | 3194.8 | 3196.7 | 3196.8 | 3195.4 |
| 264 | 3217.2 | 3217.6 | 3221.0 | 3217.7 | 3218.7 | 3216.4 | 3217.9 | 3217.6 |
| 265 | 3217.5 | 3221.6 | 3222.0 | 3223.6 | 3221.1 | 3223.7 | 3222.4 | 3221.1 |
| 266 | 3245.6 | 3244.4 | 3246.1 | 3244.6 | 3245.9 | 3243.9 | 3244.2 | 3244.0 |
| 267 | 3257.4 | 3257.4 | 3257.5 | 3257.3 | 3257.5 | 3257.5 | 3257.5 | 3257.4 |
| 268 | 3257.5 | 3257.4 | 3257.6 | 3257.6 | 3257.6 | 3257.6 | 3257.7 | 3257.5 |
| 269 | 3588.2 | 3591.8 | 3591.4 | 3589.6 | 3589.3 | 3592.3 | 3589.5 | 3589.7 |
| 270 | 3768.0 | 3768.0 | 3767.6 | 3767.8 | 3767.9 | 3767.7 | 3768.5 | 3767.7 |

in dichloromethane

| Freq. # | conf1 | conf2 | conf3 | conf6 | conf7 | conf8 | conf9 | conf10 |
|---------|-------|-------|-------|-------|-------|-------|-------|--------|
| 1       | 5.6   | 4.5   | 5.9   | 1.7   | 5.5   | 4.1   | 6.3   | 3.8    |
| 2       | 9.2   | 7.7   | 6.8   | 4.8   | 8.0   | 7.2   | 7.2   | 7.9    |
| 3       | 9.6   | 9.2   | 9.4   | 6.1   | 9.2   | 9.0   | 8.7   | 8.9    |
| 4       | 10.9  | 10.1  | 10.6  | 7.6   | 11.4  | 10.6  | 10.9  | 10.3   |
| 5       | 13.5  | 13.2  | 11.9  | 10.7  | 12.9  | 14.1  | 13.1  | 11.3   |
| 6       | 16.4  | 14.2  | 13.7  | 13.5  | 14.5  | 14.8  | 13.7  | 15.4   |
| 7       | 17.9  | 18.3  | 15.6  | 14.2  | 17.6  | 17.3  | 19.2  | 15.5   |
| 8       | 24.0  | 22.4  | 24.4  | 22.7  | 24.2  | 22.1  | 22.2  | 23.6   |
| 9       | 30.1  | 25.7  | 28.8  | 29.2  | 30.7  | 27.0  | 30.3  | 25.8   |
| 10      | 34.3  | 33.5  | 33.9  | 32.4  | 34.5  | 32.7  | 33.7  | 32.0   |
| 11      | 37.8  | 39.0  | 39.8  | 35.6  | 36.7  | 35.2  | 39.9  | 39.0   |
| 12      | 48.3  | 43.3  | 42.0  | 44.1  | 42.5  | 44.5  | 43.1  | 45.0   |
| 13      | 54.2  | 50.8  | 54.1  | 53.7  | 54.8  | 50.8  | 51.9  | 51.5   |
| 14      | 59.3  | 52.4  | 56.8  | 54.3  | 57.3  | 51.2  | 53.3  | 53.3   |
| 15      | 61.2  | 57.4  | 61.4  | 59.8  | 62.4  | 58.9  | 60.6  | 60.1   |
| 16      | 65.3  | 62.3  | 62.5  | 60.8  | 63.2  | 63.0  | 61.0  | 62.6   |
| 17      | 67.9  | 65.4  | 66.6  | 65.9  | 67.1  | 65.1  | 68.4  | 67.4   |
| 18      | 73.4  | 73.4  | 70.0  | 70.3  | 71.8  | 71.0  | 73.0  | 72.9   |
| 19      | 74.1  | 76.5  | 72.9  | 74.9  | 74.9  | 77.0  | 75.7  | 75.4   |
| 20      | 80.8  | 83.1  | 83.6  | 83.2  | 83.1  | 84.0  | 84.5  | 80.1   |
| 21      | 88.7  | 87.4  | 86.7  | 87.8  | 86.2  | 88.6  | 89.6  | 87.1   |
| 22      | 90.1  | 93.5  | 97.1  | 93.8  | 94.4  | 94.4  | 95.1  | 89.5   |
| 23      | 98.7  | 96.7  | 100.8 | 101.0 | 100.0 | 97.8  | 97.9  | 96.8   |
| 24      | 111.7 | 111.0 | 110.3 | 110.5 | 110.1 | 109.8 | 110.0 | 109.8  |
| 25      | 112.1 | 112.5 | 110.8 | 111.0 | 112.2 | 113.4 | 113.3 | 112.0  |
| 26      | 115.3 | 125.7 | 115.5 | 124.3 | 115.2 | 123.7 | 125.8 | 126.2  |

|    |       |       |       |       |       |       |       |       |
|----|-------|-------|-------|-------|-------|-------|-------|-------|
| 27 | 139.9 | 139.0 | 136.5 | 134.2 | 139.3 | 138.7 | 143.1 | 139.3 |
| 28 | 148.7 | 147.9 | 146.3 | 149.7 | 144.7 | 144.6 | 146.3 | 145.7 |
| 29 | 152.4 | 150.1 | 149.3 | 151.5 | 149.9 | 149.0 | 150.9 | 148.1 |
| 30 | 158.1 | 154.7 | 157.2 | 155.8 | 157.3 | 155.0 | 154.2 | 157.4 |
| 31 | 175.4 | 173.4 | 168.1 | 173.9 | 171.2 | 171.5 | 173.0 | 175.0 |
| 32 | 178.0 | 178.1 | 173.6 | 175.6 | 181.1 | 179.0 | 178.5 | 177.4 |
| 33 | 191.9 | 187.1 | 194.6 | 193.6 | 191.6 | 190.0 | 184.0 | 192.6 |
| 34 | 200.5 | 208.5 | 210.1 | 210.6 | 210.5 | 210.4 | 210.5 | 203.3 |
| 35 | 212.4 | 213.7 | 219.9 | 212.9 | 216.4 | 218.5 | 220.9 | 211.9 |
| 36 | 224.3 | 225.4 | 222.5 | 223.5 | 222.8 | 224.2 | 229.8 | 220.1 |
| 37 | 241.2 | 239.2 | 239.7 | 229.7 | 230.2 | 237.9 | 233.5 | 241.2 |
| 38 | 251.3 | 256.9 | 250.3 | 251.0 | 251.3 | 248.8 | 258.3 | 247.7 |
| 39 | 267.7 | 267.4 | 273.3 | 270.5 | 274.6 | 266.5 | 265.3 | 264.1 |
| 40 | 277.1 | 277.2 | 276.9 | 275.0 | 277.1 | 277.1 | 276.5 | 276.3 |
| 41 | 282.2 | 284.2 | 277.9 | 278.5 | 280.5 | 284.1 | 280.5 | 282.9 |
| 42 | 297.6 | 289.3 | 284.6 | 290.6 | 289.0 | 288.4 | 288.3 | 299.5 |
| 43 | 302.4 | 302.8 | 302.0 | 302.7 | 304.5 | 302.1 | 301.1 | 304.2 |
| 44 | 316.8 | 307.8 | 311.4 | 313.0 | 309.6 | 311.1 | 310.7 | 315.9 |
| 45 | 328.8 | 327.1 | 332.6 | 332.5 | 330.7 | 328.8 | 326.6 | 330.2 |
| 46 | 330.3 | 332.8 | 333.4 | 333.2 | 334.2 | 333.7 | 333.1 | 333.2 |
| 47 | 338.1 | 335.6 | 337.0 | 343.5 | 337.9 | 336.2 | 337.2 | 334.4 |
| 48 | 343.1 | 340.1 | 345.6 | 348.2 | 342.6 | 344.8 | 343.8 | 341.7 |
| 49 | 358.4 | 360.0 | 360.6 | 356.2 | 363.2 | 350.9 | 358.8 | 359.9 |
| 50 | 368.2 | 366.4 | 372.4 | 360.3 | 372.0 | 369.1 | 371.3 | 365.2 |
| 51 | 380.8 | 382.8 | 377.8 | 373.2 | 374.4 | 376.8 | 374.1 | 374.4 |
| 52 | 384.0 | 384.6 | 386.3 | 385.5 | 384.1 | 385.3 | 388.6 | 384.0 |
| 53 | 395.0 | 395.6 | 391.6 | 399.5 | 398.4 | 395.2 | 395.4 | 393.0 |
| 54 | 403.0 | 400.2 | 400.5 | 403.8 | 402.4 | 401.9 | 396.7 | 405.4 |
| 55 | 406.6 | 404.8 | 407.1 | 406.5 | 407.2 | 405.1 | 406.2 | 409.5 |
| 56 | 416.4 | 418.0 | 413.4 | 416.2 | 409.8 | 418.3 | 418.8 | 416.2 |
| 57 | 418.7 | 419.3 | 418.3 | 418.1 | 418.4 | 418.6 | 419.4 | 417.3 |
| 58 | 419.8 | 419.8 | 418.9 | 418.7 | 418.9 | 420.8 | 420.8 | 419.7 |
| 59 | 422.5 | 421.5 | 421.2 | 420.8 | 421.4 | 423.9 | 423.6 | 421.4 |
| 60 | 426.0 | 425.0 | 424.9 | 424.4 | 424.7 | 425.3 | 425.1 | 423.8 |
| 61 | 431.3 | 427.6 | 426.8 | 427.2 | 427.9 | 426.3 | 426.6 | 426.0 |
| 62 | 438.1 | 438.5 | 436.5 | 437.1 | 437.2 | 436.8 | 437.4 | 438.1 |
| 63 | 438.6 | 439.9 | 440.4 | 439.8 | 440.1 | 439.9 | 439.9 | 439.3 |
| 64 | 444.6 | 443.3 | 444.7 | 443.0 | 444.3 | 442.2 | 443.5 | 444.6 |
| 65 | 449.1 | 449.6 | 446.0 | 444.7 | 446.8 | 444.2 | 444.0 | 449.2 |
| 66 | 450.9 | 452.8 | 454.8 | 451.2 | 450.7 | 452.6 | 453.4 | 450.2 |
| 67 | 466.8 | 464.6 | 465.9 | 473.0 | 470.2 | 469.7 | 470.3 | 466.2 |
| 68 | 486.1 | 487.0 | 486.2 | 488.4 | 487.4 | 487.8 | 486.8 | 486.3 |
| 69 | 500.8 | 501.7 | 501.1 | 501.4 | 501.9 | 501.5 | 502.7 | 501.2 |
| 70 | 507.8 | 507.8 | 507.4 | 505.2 | 507.8 | 508.1 | 507.1 | 508.6 |
| 71 | 510.6 | 509.8 | 509.7 | 508.5 | 508.2 | 508.8 | 508.8 | 509.9 |
| 72 | 515.9 | 515.7 | 516.3 | 515.3 | 515.4 | 515.4 | 516.1 | 515.2 |
| 73 | 523.9 | 522.3 | 523.2 | 522.3 | 523.6 | 521.8 | 523.0 | 521.6 |

|     |       |       |       |       |       |       |       |       |
|-----|-------|-------|-------|-------|-------|-------|-------|-------|
| 74  | 532.7 | 533.2 | 533.8 | 533.1 | 533.3 | 533.6 | 533.5 | 533.1 |
| 75  | 535.1 | 534.2 | 534.5 | 535.5 | 534.6 | 534.1 | 534.1 | 534.8 |
| 76  | 542.6 | 542.9 | 543.8 | 543.2 | 545.8 | 542.1 | 546.4 | 542.5 |
| 77  | 544.8 | 547.8 | 546.4 | 543.6 | 546.2 | 546.3 | 547.2 | 544.2 |
| 78  | 550.8 | 547.9 | 549.4 | 549.0 | 547.8 | 547.9 | 548.1 | 550.4 |
| 79  | 554.0 | 552.9 | 553.1 | 552.8 | 553.3 | 553.2 | 553.0 | 552.8 |
| 80  | 568.5 | 568.7 | 568.2 | 567.8 | 569.1 | 568.7 | 569.1 | 568.7 |
| 81  | 571.6 | 570.1 | 570.5 | 571.4 | 569.5 | 570.0 | 569.8 | 570.4 |
| 82  | 583.9 | 588.4 | 583.6 | 584.1 | 584.4 | 588.4 | 588.4 | 584.4 |
| 83  | 631.2 | 630.3 | 630.5 | 630.4 | 631.1 | 630.0 | 630.8 | 630.3 |
| 84  | 633.5 | 631.0 | 633.4 | 634.3 | 633.7 | 631.0 | 630.9 | 633.9 |
| 85  | 643.8 | 642.2 | 644.0 | 644.4 | 644.0 | 642.8 | 642.9 | 643.5 |
| 86  | 645.3 | 644.9 | 645.8 | 645.9 | 646.3 | 645.3 | 645.6 | 645.1 |
| 87  | 651.0 | 649.9 | 651.5 | 651.1 | 651.3 | 650.1 | 649.9 | 650.9 |
| 88  | 653.0 | 653.5 | 653.3 | 653.3 | 653.1 | 653.4 | 653.5 | 653.3 |
| 89  | 656.3 | 656.1 | 656.4 | 657.2 | 656.2 | 656.1 | 656.3 | 657.2 |
| 90  | 665.7 | 666.1 | 666.1 | 664.9 | 666.5 | 666.3 | 665.7 | 665.8 |
| 91  | 668.3 | 674.1 | 675.8 | 673.9 | 673.8 | 674.9 | 672.3 | 673.4 |
| 92  | 675.9 | 677.8 | 677.4 | 674.0 | 675.7 | 677.8 | 678.2 | 673.8 |
| 93  | 684.3 | 684.7 | 685.2 | 684.7 | 684.4 | 684.5 | 685.1 | 685.2 |
| 94  | 686.6 | 686.2 | 685.6 | 685.3 | 686.1 | 685.6 | 685.9 | 685.6 |
| 95  | 705.9 | 702.0 | 705.1 | 705.9 | 705.6 | 702.0 | 702.3 | 705.7 |
| 96  | 712.4 | 706.4 | 711.9 | 711.5 | 711.9 | 706.5 | 706.2 | 712.1 |
| 97  | 712.7 | 712.2 | 712.8 | 712.0 | 712.3 | 711.7 | 712.3 | 712.4 |
| 98  | 714.0 | 712.8 | 714.4 | 712.4 | 714.3 | 713.0 | 713.0 | 712.8 |
| 99  | 714.5 | 715.2 | 715.5 | 715.5 | 715.0 | 714.7 | 715.7 | 714.8 |
| 100 | 726.6 | 726.4 | 726.7 | 726.7 | 726.6 | 726.5 | 726.6 | 726.2 |
| 101 | 736.4 | 735.3 | 736.0 | 734.7 | 736.1 | 735.3 | 734.9 | 735.5 |
| 102 | 743.5 | 743.2 | 743.2 | 742.7 | 742.9 | 742.7 | 743.3 | 743.2 |
| 103 | 749.2 | 749.0 | 749.2 | 748.3 | 748.6 | 748.6 | 749.0 | 749.0 |
| 104 | 749.5 | 749.5 | 749.5 | 749.3 | 749.5 | 749.4 | 749.5 | 749.4 |
| 105 | 781.3 | 783.4 | 781.9 | 782.5 | 781.1 | 783.0 | 783.2 | 782.4 |
| 106 | 783.8 | 796.8 | 783.2 | 782.9 | 783.3 | 797.0 | 797.0 | 783.0 |
| 107 | 816.3 | 815.8 | 816.6 | 816.3 | 816.2 | 815.9 | 816.2 | 815.8 |
| 108 | 822.0 | 819.9 | 821.8 | 822.7 | 822.0 | 820.5 | 820.1 | 822.1 |
| 109 | 826.0 | 822.9 | 827.2 | 824.0 | 826.5 | 822.8 | 823.8 | 824.4 |
| 110 | 829.9 | 830.1 | 829.3 | 831.0 | 830.1 | 830.1 | 830.1 | 830.2 |
| 111 | 830.5 | 831.3 | 831.6 | 833.2 | 832.2 | 832.8 | 832.7 | 831.6 |
| 112 | 832.8 | 832.6 | 832.8 | 833.6 | 832.7 | 832.9 | 834.1 | 833.2 |
| 113 | 833.8 | 835.8 | 834.7 | 834.3 | 833.3 | 834.3 | 834.8 | 836.0 |
| 114 | 836.5 | 837.1 | 836.9 | 835.6 | 835.8 | 836.8 | 836.9 | 837.5 |
| 115 | 837.6 | 839.6 | 837.4 | 840.2 | 837.1 | 840.1 | 840.3 | 839.4 |
| 116 | 845.1 | 845.1 | 846.3 | 847.7 | 845.9 | 845.1 | 845.5 | 846.0 |
| 117 | 847.5 | 847.9 | 847.7 | 848.2 | 848.7 | 848.1 | 847.9 | 848.2 |
| 118 | 849.6 | 848.9 | 850.8 | 850.5 | 850.6 | 849.7 | 849.9 | 850.1 |
| 119 | 855.8 | 854.9 | 854.4 | 853.6 | 854.2 | 853.3 | 854.4 | 854.0 |
| 120 | 856.4 | 855.6 | 856.3 | 854.7 | 856.1 | 855.1 | 854.8 | 855.4 |

|     |        |        |        |        |        |        |        |        |
|-----|--------|--------|--------|--------|--------|--------|--------|--------|
| 121 | 857.6  | 856.6  | 856.6  | 855.3  | 856.3  | 857.0  | 856.8  | 857.0  |
| 122 | 867.6  | 869.3  | 867.5  | 867.2  | 867.5  | 869.2  | 869.4  | 867.1  |
| 123 | 887.1  | 883.7  | 887.1  | 884.2  | 887.1  | 883.8  | 884.2  | 883.8  |
| 124 | 896.0  | 892.6  | 895.8  | 892.8  | 896.1  | 892.6  | 892.9  | 892.2  |
| 125 | 912.8  | 912.9  | 913.4  | 912.9  | 912.7  | 913.0  | 913.1  | 913.0  |
| 126 | 913.4  | 913.5  | 913.7  | 913.5  | 913.6  | 913.4  | 913.3  | 913.4  |
| 127 | 928.3  | 927.9  | 927.6  | 927.1  | 927.7  | 927.5  | 927.3  | 928.0  |
| 128 | 928.6  | 928.5  | 928.5  | 928.1  | 928.1  | 928.5  | 928.7  | 928.5  |
| 129 | 935.2  | 935.3  | 935.3  | 935.4  | 935.6  | 935.3  | 935.2  | 935.3  |
| 130 | 935.5  | 935.6  | 935.7  | 936.0  | 935.7  | 935.8  | 935.7  | 935.5  |
| 131 | 937.1  | 937.1  | 937.4  | 936.9  | 937.2  | 936.8  | 937.1  | 937.4  |
| 132 | 958.2  | 958.2  | 957.6  | 959.1  | 958.4  | 958.5  | 959.7  | 956.2  |
| 133 | 965.0  | 965.7  | 959.5  | 964.0  | 961.5  | 963.8  | 965.1  | 958.5  |
| 134 | 968.9  | 968.4  | 965.5  | 965.5  | 965.1  | 965.7  | 965.9  | 966.1  |
| 135 | 969.5  | 969.0  | 968.4  | 968.3  | 967.8  | 967.8  | 968.9  | 968.6  |
| 136 | 970.7  | 969.2  | 969.2  | 969.4  | 969.3  | 969.5  | 969.7  | 969.4  |
| 137 | 976.0  | 976.4  | 976.6  | 976.9  | 976.2  | 976.5  | 976.8  | 976.6  |
| 138 | 980.7  | 980.7  | 980.4  | 980.3  | 980.7  | 980.3  | 980.4  | 980.6  |
| 139 | 981.3  | 980.8  | 981.3  | 981.0  | 981.1  | 980.9  | 980.9  | 981.1  |
| 140 | 981.8  | 981.6  | 982.0  | 981.5  | 981.5  | 981.7  | 981.7  | 982.1  |
| 141 | 982.1  | 982.4  | 982.8  | 982.7  | 982.5  | 982.7  | 983.7  | 982.5  |
| 142 | 986.5  | 987.3  | 986.4  | 987.1  | 986.4  | 987.2  | 987.2  | 985.6  |
| 143 | 995.7  | 995.0  | 995.3  | 994.3  | 995.6  | 995.4  | 995.8  | 995.1  |
| 144 | 996.4  | 996.9  | 995.9  | 997.1  | 996.2  | 996.7  | 997.3  | 996.8  |
| 145 | 1007.2 | 1006.4 | 1006.8 | 1006.4 | 1007.2 | 1006.5 | 1006.0 | 1007.2 |
| 146 | 1024.6 | 1024.7 | 1024.6 | 1024.5 | 1024.6 | 1024.5 | 1024.3 | 1024.7 |
| 147 | 1027.6 | 1027.5 | 1027.9 | 1027.7 | 1027.7 | 1027.5 | 1027.4 | 1027.6 |
| 148 | 1028.1 | 1028.0 | 1028.2 | 1028.1 | 1028.2 | 1027.9 | 1027.8 | 1028.2 |
| 149 | 1028.2 | 1028.4 | 1028.5 | 1028.2 | 1028.3 | 1028.0 | 1028.0 | 1028.7 |
| 150 | 1040.2 | 1040.0 | 1040.3 | 1040.2 | 1040.2 | 1040.0 | 1040.0 | 1039.8 |
| 151 | 1041.0 | 1040.8 | 1040.9 | 1040.2 | 1040.9 | 1040.9 | 1041.0 | 1040.1 |
| 152 | 1041.4 | 1041.3 | 1041.5 | 1040.8 | 1041.2 | 1041.4 | 1041.4 | 1041.1 |
| 153 | 1076.6 | 1076.9 | 1077.9 | 1076.9 | 1077.1 | 1076.9 | 1076.9 | 1077.1 |
| 154 | 1077.0 | 1078.3 | 1078.3 | 1077.7 | 1078.2 | 1078.0 | 1077.9 | 1078.0 |
| 155 | 1079.5 | 1080.5 | 1079.5 | 1079.3 | 1079.5 | 1080.4 | 1080.4 | 1079.3 |
| 156 | 1115.4 | 1116.0 | 1116.4 | 1115.9 | 1115.9 | 1115.9 | 1115.9 | 1115.7 |
| 157 | 1115.8 | 1116.4 | 1116.5 | 1116.9 | 1116.8 | 1116.5 | 1116.5 | 1116.3 |
| 158 | 1139.9 | 1140.7 | 1140.2 | 1140.7 | 1140.0 | 1140.5 | 1140.8 | 1140.9 |
| 159 | 1144.4 | 1146.3 | 1144.8 | 1146.7 | 1144.8 | 1146.5 | 1146.1 | 1145.9 |
| 160 | 1145.7 | 1147.4 | 1146.7 | 1147.2 | 1146.5 | 1147.5 | 1147.0 | 1147.3 |
| 161 | 1147.2 | 1147.8 | 1147.4 | 1148.2 | 1147.5 | 1148.0 | 1147.6 | 1147.6 |
| 162 | 1157.6 | 1157.6 | 1157.7 | 1157.8 | 1157.6 | 1157.6 | 1157.6 | 1157.5 |
| 163 | 1158.5 | 1158.5 | 1158.4 | 1158.5 | 1158.5 | 1158.6 | 1158.3 | 1158.4 |
| 164 | 1168.4 | 1169.0 | 1168.6 | 1168.0 | 1168.4 | 1169.3 | 1169.1 | 1167.8 |
| 165 | 1186.1 | 1186.4 | 1186.4 | 1186.2 | 1186.2 | 1186.3 | 1186.6 | 1186.5 |
| 166 | 1188.7 | 1189.2 | 1188.9 | 1188.7 | 1188.8 | 1189.1 | 1189.4 | 1189.2 |
| 167 | 1190.6 | 1191.0 | 1190.9 | 1190.7 | 1190.8 | 1190.9 | 1191.1 | 1191.0 |

|     |        |        |        |        |        |        |        |        |
|-----|--------|--------|--------|--------|--------|--------|--------|--------|
| 168 | 1201.2 | 1201.4 | 1201.4 | 1200.7 | 1201.5 | 1201.1 | 1200.4 | 1201.2 |
| 169 | 1203.0 | 1203.6 | 1203.3 | 1203.1 | 1203.3 | 1203.5 | 1203.0 | 1203.5 |
| 170 | 1206.7 | 1207.5 | 1207.6 | 1208.0 | 1207.3 | 1207.5 | 1207.6 | 1207.3 |
| 171 | 1219.6 | 1216.1 | 1219.5 | 1219.4 | 1219.7 | 1216.2 | 1216.1 | 1219.4 |
| 172 | 1222.7 | 1219.4 | 1223.3 | 1223.5 | 1223.1 | 1219.4 | 1219.3 | 1223.6 |
| 173 | 1224.4 | 1224.8 | 1224.9 | 1225.4 | 1224.9 | 1224.8 | 1224.8 | 1224.6 |
| 174 | 1250.3 | 1253.8 | 1249.8 | 1253.3 | 1250.4 | 1253.1 | 1252.6 | 1253.7 |
| 175 | 1267.0 | 1259.4 | 1266.4 | 1264.9 | 1267.1 | 1259.2 | 1258.8 | 1265.3 |
| 176 | 1268.5 | 1268.7 | 1268.7 | 1268.4 | 1268.5 | 1268.8 | 1268.4 | 1268.5 |
| 177 | 1268.9 | 1268.9 | 1269.2 | 1268.8 | 1269.0 | 1268.9 | 1269.1 | 1268.7 |
| 178 | 1272.4 | 1281.0 | 1272.4 | 1272.0 | 1272.3 | 1281.1 | 1280.9 | 1272.0 |
| 179 | 1285.0 | 1284.7 | 1284.0 | 1284.2 | 1284.5 | 1284.4 | 1284.3 | 1284.5 |
| 180 | 1287.2 | 1286.6 | 1286.2 | 1286.4 | 1286.4 | 1286.5 | 1286.8 | 1286.6 |
| 181 | 1289.5 | 1289.5 | 1289.1 | 1289.3 | 1289.2 | 1289.5 | 1289.4 | 1289.4 |
| 182 | 1292.4 | 1293.4 | 1293.8 | 1293.2 | 1292.9 | 1293.4 | 1293.2 | 1292.6 |
| 183 | 1295.2 | 1295.1 | 1295.4 | 1294.7 | 1295.2 | 1295.1 | 1294.7 | 1295.1 |
| 184 | 1297.5 | 1297.7 | 1297.7 | 1296.8 | 1297.4 | 1297.7 | 1296.7 | 1297.6 |
| 185 | 1299.7 | 1299.1 | 1299.6 | 1299.4 | 1299.3 | 1298.8 | 1299.3 | 1299.8 |
| 186 | 1302.9 | 1302.4 | 1302.9 | 1302.6 | 1303.0 | 1302.3 | 1302.3 | 1302.6 |
| 187 | 1320.0 | 1319.8 | 1319.8 | 1320.1 | 1320.0 | 1319.9 | 1319.9 | 1319.7 |
| 188 | 1326.2 | 1325.3 | 1326.0 | 1324.6 | 1326.1 | 1325.2 | 1325.2 | 1324.8 |
| 189 | 1330.2 | 1330.8 | 1330.1 | 1330.5 | 1330.2 | 1330.7 | 1330.6 | 1330.4 |
| 190 | 1332.9 | 1333.0 | 1333.0 | 1332.9 | 1333.0 | 1333.0 | 1332.9 | 1332.9 |
| 191 | 1348.1 | 1348.3 | 1348.4 | 1348.2 | 1348.4 | 1348.3 | 1348.6 | 1347.8 |
| 192 | 1350.7 | 1351.1 | 1350.6 | 1351.2 | 1351.0 | 1351.3 | 1350.7 | 1350.9 |
| 193 | 1352.2 | 1352.2 | 1352.1 | 1351.8 | 1352.2 | 1352.0 | 1352.2 | 1351.4 |
| 194 | 1358.7 | 1360.9 | 1358.0 | 1359.6 | 1359.0 | 1359.6 | 1358.6 | 1361.0 |
| 195 | 1371.5 | 1371.1 | 1371.4 | 1370.9 | 1371.4 | 1371.1 | 1371.1 | 1370.3 |
| 196 | 1372.8 | 1374.1 | 1372.7 | 1373.3 | 1372.9 | 1373.6 | 1372.9 | 1374.1 |
| 197 | 1388.6 | 1388.7 | 1388.8 | 1388.5 | 1389.1 | 1388.8 | 1388.7 | 1388.7 |
| 198 | 1388.9 | 1389.5 | 1389.6 | 1389.1 | 1389.3 | 1389.3 | 1389.4 | 1389.1 |
| 199 | 1394.7 | 1394.9 | 1395.5 | 1394.8 | 1394.5 | 1394.8 | 1394.4 | 1394.2 |
| 200 | 1394.9 | 1395.2 | 1395.6 | 1395.1 | 1395.5 | 1395.3 | 1394.6 | 1395.0 |
| 201 | 1407.7 | 1404.5 | 1407.4 | 1406.5 | 1407.2 | 1404.4 | 1404.7 | 1405.2 |
| 202 | 1410.7 | 1419.0 | 1411.4 | 1410.6 | 1411.2 | 1419.1 | 1419.0 | 1410.4 |
| 203 | 1429.9 | 1435.0 | 1430.0 | 1429.0 | 1429.7 | 1434.8 | 1435.2 | 1428.5 |
| 204 | 1439.0 | 1439.3 | 1439.1 | 1439.0 | 1439.2 | 1439.3 | 1439.0 | 1439.2 |
| 205 | 1445.1 | 1445.7 | 1446.5 | 1446.2 | 1445.7 | 1445.7 | 1445.8 | 1445.2 |
| 206 | 1448.5 | 1446.0 | 1448.2 | 1448.5 | 1448.2 | 1446.2 | 1446.2 | 1449.2 |
| 207 | 1453.8 | 1453.0 | 1453.6 | 1453.6 | 1453.8 | 1453.2 | 1452.7 | 1453.8 |
| 208 | 1456.8 | 1456.4 | 1456.4 | 1456.4 | 1456.4 | 1456.4 | 1456.3 | 1456.7 |
| 209 | 1458.7 | 1457.0 | 1458.7 | 1458.9 | 1458.8 | 1457.0 | 1457.1 | 1459.2 |
| 210 | 1480.2 | 1463.1 | 1480.4 | 1479.1 | 1480.2 | 1462.9 | 1462.8 | 1479.1 |
| 211 | 1487.2 | 1487.6 | 1487.7 | 1487.9 | 1487.6 | 1487.6 | 1487.8 | 1487.6 |
| 212 | 1487.6 | 1487.8 | 1487.9 | 1488.1 | 1487.9 | 1488.0 | 1488.0 | 1487.8 |
| 213 | 1490.1 | 1490.2 | 1490.3 | 1490.5 | 1490.1 | 1490.4 | 1490.4 | 1490.0 |
| 214 | 1490.4 | 1490.3 | 1490.5 | 1490.6 | 1490.3 | 1490.7 | 1490.4 | 1490.3 |

|     |        |        |        |        |        |        |        |        |
|-----|--------|--------|--------|--------|--------|--------|--------|--------|
| 215 | 1515.2 | 1515.7 | 1515.5 | 1515.8 | 1515.7 | 1515.8 | 1515.7 | 1515.1 |
| 216 | 1516.6 | 1516.0 | 1516.2 | 1516.5 | 1516.2 | 1516.2 | 1516.4 | 1516.6 |
| 217 | 1529.3 | 1531.6 | 1529.5 | 1528.4 | 1529.4 | 1531.4 | 1531.3 | 1528.5 |
| 218 | 1532.8 | 1540.5 | 1533.1 | 1534.9 | 1533.1 | 1540.4 | 1540.1 | 1534.9 |
| 219 | 1540.6 | 1540.6 | 1540.2 | 1540.4 | 1540.6 | 1540.6 | 1540.4 | 1540.5 |
| 220 | 1541.5 | 1545.3 | 1541.7 | 1540.6 | 1541.8 | 1545.4 | 1545.1 | 1540.7 |
| 221 | 1546.8 | 1546.7 | 1546.8 | 1546.9 | 1546.8 | 1546.7 | 1546.9 | 1546.7 |
| 222 | 1576.8 | 1576.1 | 1577.1 | 1578.1 | 1577.0 | 1576.2 | 1575.8 | 1578.2 |
| 223 | 1580.5 | 1579.5 | 1580.5 | 1580.4 | 1580.6 | 1579.5 | 1579.4 | 1580.5 |
| 224 | 1593.1 | 1593.1 | 1593.3 | 1593.4 | 1593.1 | 1593.2 | 1593.4 | 1593.0 |
| 225 | 1594.9 | 1594.6 | 1594.6 | 1594.4 | 1594.9 | 1594.4 | 1594.2 | 1594.7 |
| 226 | 1607.3 | 1603.8 | 1607.3 | 1607.3 | 1607.3 | 1603.8 | 1603.7 | 1607.4 |
| 227 | 1623.5 | 1623.1 | 1623.5 | 1622.8 | 1623.4 | 1622.9 | 1623.3 | 1622.6 |
| 228 | 1623.6 | 1623.7 | 1623.6 | 1623.2 | 1623.7 | 1623.8 | 1623.6 | 1623.5 |
| 229 | 1626.5 | 1624.4 | 1626.2 | 1624.0 | 1626.5 | 1624.4 | 1624.2 | 1624.2 |
| 230 | 1629.5 | 1631.8 | 1629.7 | 1630.9 | 1629.8 | 1631.7 | 1631.4 | 1631.2 |
| 231 | 1636.9 | 1637.0 | 1637.1 | 1637.3 | 1637.2 | 1637.0 | 1637.2 | 1636.9 |
| 232 | 1640.1 | 1641.6 | 1640.1 | 1639.7 | 1640.1 | 1641.6 | 1641.4 | 1639.8 |
| 233 | 1645.2 | 1645.9 | 1645.2 | 1645.1 | 1645.3 | 1645.9 | 1645.9 | 1645.0 |
| 234 | 1651.0 | 1650.9 | 1651.0 | 1650.6 | 1651.0 | 1650.9 | 1650.8 | 1650.6 |
| 235 | 1678.1 | 1679.3 | 1678.0 | 1679.0 | 1678.3 | 1679.3 | 1678.9 | 1679.3 |
| 236 | 1764.4 | 1764.3 | 1764.4 | 1764.4 | 1764.4 | 1764.2 | 1764.1 | 1764.3 |
| 237 | 2321.4 | 2321.2 | 2321.2 | 2321.3 | 2321.4 | 2321.2 | 2321.5 | 2321.4 |
| 238 | 3028.9 | 3029.5 | 3029.2 | 3029.4 | 3029.4 | 3029.1 | 3029.6 | 3029.0 |
| 239 | 3029.2 | 3029.6 | 3029.3 | 3030.1 | 3029.9 | 3029.6 | 3029.6 | 3029.2 |
| 240 | 3039.8 | 3040.1 | 3039.9 | 3040.3 | 3040.1 | 3039.8 | 3040.2 | 3039.6 |
| 241 | 3040.0 | 3040.4 | 3039.9 | 3040.8 | 3040.7 | 3040.8 | 3040.4 | 3039.7 |
| 242 | 3125.4 | 3125.9 | 3125.8 | 3125.9 | 3125.7 | 3125.1 | 3125.3 | 3125.8 |
| 243 | 3125.7 | 3126.3 | 3125.9 | 3126.3 | 3126.6 | 3125.4 | 3126.5 | 3125.9 |
| 244 | 3128.0 | 3128.2 | 3127.7 | 3127.8 | 3127.9 | 3128.0 | 3126.9 | 3128.2 |
| 245 | 3129.0 | 3128.6 | 3127.9 | 3128.5 | 3128.7 | 3128.9 | 3128.5 | 3128.7 |
| 246 | 3135.8 | 3135.6 | 3135.4 | 3135.5 | 3135.7 | 3135.8 | 3135.8 | 3135.5 |
| 247 | 3144.0 | 3141.6 | 3144.4 | 3143.5 | 3143.2 | 3143.7 | 3142.9 | 3142.6 |
| 248 | 3144.5 | 3144.1 | 3147.0 | 3144.3 | 3144.4 | 3144.2 | 3144.2 | 3144.2 |
| 249 | 3162.0 | 3161.0 | 3162.7 | 3160.0 | 3162.2 | 3160.9 | 3159.9 | 3161.2 |
| 250 | 3163.1 | 3162.9 | 3162.9 | 3162.7 | 3163.3 | 3162.6 | 3163.2 | 3162.9 |
| 251 | 3167.0 | 3169.4 | 3166.7 | 3169.6 | 3167.0 | 3169.5 | 3169.5 | 3169.4 |
| 252 | 3169.7 | 3169.6 | 3169.0 | 3170.0 | 3169.3 | 3170.1 | 3169.8 | 3170.0 |
| 253 | 3169.9 | 3174.3 | 3169.3 | 3174.2 | 3170.2 | 3175.5 | 3175.5 | 3175.3 |
| 254 | 3175.2 | 3176.6 | 3176.4 | 3176.3 | 3174.1 | 3176.4 | 3176.1 | 3176.7 |
| 255 | 3176.8 | 3177.1 | 3177.0 | 3176.9 | 3176.9 | 3176.8 | 3176.7 | 3177.1 |
| 256 | 3185.5 | 3183.3 | 3185.7 | 3182.1 | 3185.7 | 3183.4 | 3182.7 | 3182.3 |
| 257 | 3185.7 | 3185.7 | 3185.8 | 3185.6 | 3186.0 | 3185.7 | 3185.6 | 3185.5 |
| 258 | 3189.5 | 3185.8 | 3189.1 | 3185.7 | 3189.6 | 3185.8 | 3185.7 | 3185.8 |
| 259 | 3192.1 | 3192.2 | 3192.0 | 3192.2 | 3191.9 | 3192.3 | 3192.1 | 3192.2 |
| 260 | 3192.4 | 3192.4 | 3192.2 | 3192.5 | 3192.5 | 3192.5 | 3192.4 | 3192.2 |
| 261 | 3192.9 | 3192.6 | 3192.9 | 3192.8 | 3192.8 | 3192.6 | 3193.0 | 3192.9 |

|     |        |        |        |        |        |        |        |        |
|-----|--------|--------|--------|--------|--------|--------|--------|--------|
| 262 | 3194.4 | 3194.1 | 3194.5 | 3194.4 | 3194.4 | 3194.0 | 3194.4 | 3194.4 |
| 263 | 3194.9 | 3196.7 | 3194.9 | 3195.1 | 3194.8 | 3196.5 | 3196.7 | 3195.2 |
| 264 | 3216.2 | 3216.4 | 3219.4 | 3217.5 | 3218.1 | 3215.2 | 3216.3 | 3216.8 |
| 265 | 3216.6 | 3220.1 | 3220.0 | 3222.5 | 3219.6 | 3222.1 | 3220.7 | 3219.9 |
| 266 | 3245.0 | 3243.9 | 3245.7 | 3243.9 | 3245.5 | 3243.5 | 3243.6 | 3243.6 |
| 267 | 3256.0 | 3256.0 | 3255.9 | 3256.1 | 3256.0 | 3256.0 | 3256.0 | 3255.9 |
| 268 | 3256.0 | 3256.0 | 3256.1 | 3256.2 | 3256.2 | 3256.1 | 3256.2 | 3256.0 |
| 269 | 3586.3 | 3587.7 | 3588.3 | 3585.9 | 3586.9 | 3588.8 | 3585.0 | 3586.6 |
| 270 | 3762.2 | 3761.8 | 3761.0 | 3760.8 | 3762.1 | 3761.6 | 3761.8 | 3761.0 |

Table S24. Vibrational frequencies (in  $\text{cm}^{-1}$ ) of TEBT-Pyc in toluene and dichloromethane obtained from B3LYP/6-311G(d,p) calculations.

in toluene

| Freq. # | conf1 | conf3 | conf4 | conf5 | conf8 | conf9 |
|---------|-------|-------|-------|-------|-------|-------|
| 1       | 4.6   | 2.7   | 4.4   | 4.6   | 2.9   | 3.8   |
| 2       | 7.2   | 8.3   | 7.6   | 7.7   | 8.3   | 7.0   |
| 3       | 8.4   | 9.3   | 10.8  | 8.9   | 12.8  | 8.2   |
| 4       | 14.2  | 15.3  | 13.3  | 13.2  | 14.7  | 13.3  |
| 5       | 18.4  | 16.8  | 18.7  | 18.3  | 17.1  | 18.2  |
| 6       | 21.6  | 19.9  | 20.8  | 20.6  | 19.0  | 19.2  |
| 7       | 23.6  | 23.5  | 23.7  | 24.0  | 21.6  | 23.9  |
| 8       | 30.4  | 31.2  | 30.8  | 32.8  | 31.8  | 30.5  |
| 9       | 35.6  | 37.1  | 38.5  | 36.9  | 37.4  | 33.7  |
| 10      | 41.3  | 39.1  | 41.1  | 37.4  | 39.6  | 40.9  |
| 11      | 46.2  | 47.7  | 46.2  | 49.9  | 45.8  | 45.0  |
| 12      | 50.1  | 55.2  | 56.2  | 51.3  | 54.5  | 52.1  |
| 13      | 54.2  | 57.5  | 57.9  | 56.8  | 56.1  | 53.5  |
| 14      | 58.3  | 58.0  | 59.4  | 60.0  | 57.9  | 54.1  |
| 15      | 66.2  | 67.2  | 66.6  | 63.7  | 65.5  | 65.2  |
| 16      | 68.2  | 68.3  | 69.5  | 66.8  | 69.5  | 67.6  |
| 17      | 74.3  | 72.9  | 73.2  | 73.8  | 71.3  | 72.9  |
| 18      | 78.4  | 78.8  | 81.9  | 79.3  | 81.9  | 79.6  |
| 19      | 83.4  | 84.3  | 83.4  | 85.2  | 86.1  | 82.8  |
| 20      | 92.2  | 93.4  | 90.2  | 96.9  | 94.3  | 92.5  |
| 21      | 97.0  | 98.9  | 97.4  | 101.9 | 97.8  | 98.2  |
| 22      | 112.2 | 112.7 | 113.5 | 112.1 | 113.1 | 110.5 |
| 23      | 119.8 | 119.0 | 119.5 | 117.2 | 115.9 | 117.4 |
| 24      | 133.6 | 133.9 | 134.2 | 129.4 | 134.5 | 133.2 |
| 25      | 134.7 | 141.2 | 137.6 | 139.6 | 141.0 | 138.6 |
| 26      | 144.4 | 147.1 | 142.7 | 149.9 | 147.3 | 146.1 |
| 27      | 147.2 | 148.4 | 147.5 | 152.3 | 147.4 | 150.3 |
| 28      | 164.8 | 158.6 | 165.7 | 161.9 | 157.7 | 157.2 |
| 29      | 178.1 | 165.2 | 177.2 | 177.1 | 167.1 | 169.3 |
| 30      | 181.3 | 174.1 | 181.0 | 194.7 | 181.4 | 173.3 |

---

|    |       |       |       |       |       |       |
|----|-------|-------|-------|-------|-------|-------|
| 31 | 195.3 | 199.2 | 189.5 | 198.9 | 193.8 | 198.6 |
| 32 | 206.2 | 205.2 | 204.5 | 208.1 | 206.5 | 205.8 |
| 33 | 214.4 | 222.8 | 213.5 | 214.7 | 223.2 | 224.8 |
| 34 | 219.5 | 233.7 | 228.8 | 225.2 | 232.9 | 234.7 |
| 35 | 231.6 | 242.6 | 234.3 | 231.1 | 239.8 | 240.9 |
| 36 | 240.1 | 260.0 | 246.3 | 247.9 | 260.5 | 258.3 |
| 37 | 278.2 | 261.1 | 276.4 | 278.4 | 265.9 | 260.1 |
| 38 | 281.7 | 279.3 | 277.9 | 281.4 | 279.0 | 278.8 |
| 39 | 300.4 | 286.5 | 299.1 | 298.8 | 280.9 | 284.8 |
| 40 | 302.7 | 300.1 | 302.1 | 301.4 | 300.9 | 300.2 |
| 41 | 309.5 | 302.6 | 305.4 | 306.5 | 307.6 | 301.9 |
| 42 | 327.6 | 322.9 | 332.5 | 327.7 | 321.9 | 318.0 |
| 43 | 338.3 | 333.3 | 335.4 | 334.4 | 330.8 | 333.5 |
| 44 | 339.4 | 343.8 | 340.3 | 350.4 | 340.0 | 346.4 |
| 45 | 347.3 | 347.6 | 347.4 | 354.6 | 347.4 | 350.1 |
| 46 | 358.1 | 360.6 | 363.7 | 359.3 | 358.1 | 360.4 |
| 47 | 363.9 | 374.0 | 371.9 | 367.4 | 381.4 | 373.2 |
| 48 | 382.7 | 385.6 | 376.7 | 379.5 | 386.8 | 376.4 |
| 49 | 391.0 | 389.5 | 388.0 | 395.9 | 390.5 | 394.2 |
| 50 | 396.3 | 397.5 | 396.2 | 412.4 | 396.5 | 399.2 |
| 51 | 410.9 | 405.1 | 411.3 | 417.6 | 406.1 | 405.5 |
| 52 | 419.5 | 420.0 | 420.0 | 420.0 | 419.9 | 418.9 |
| 53 | 421.1 | 420.2 | 421.3 | 422.1 | 420.3 | 420.9 |
| 54 | 425.1 | 425.4 | 425.7 | 425.7 | 425.1 | 424.8 |
| 55 | 426.5 | 428.8 | 427.2 | 428.5 | 427.2 | 427.0 |
| 56 | 438.4 | 438.2 | 437.2 | 437.9 | 433.7 | 438.8 |
| 57 | 439.8 | 441.2 | 441.0 | 442.6 | 441.1 | 441.7 |
| 58 | 445.4 | 449.4 | 447.9 | 446.2 | 442.6 | 448.6 |
| 59 | 452.9 | 452.4 | 452.4 | 450.6 | 457.8 | 449.7 |
| 60 | 472.9 | 469.6 | 469.0 | 468.0 | 474.4 | 468.3 |
| 61 | 499.8 | 501.4 | 501.2 | 501.3 | 499.9 | 501.3 |
| 62 | 505.8 | 505.7 | 505.0 | 504.5 | 505.1 | 505.1 |
| 63 | 513.0 | 515.8 | 513.3 | 514.4 | 515.3 | 514.2 |
| 64 | 521.8 | 521.4 | 522.0 | 522.9 | 521.5 | 520.3 |
| 65 | 523.7 | 522.6 | 524.2 | 526.8 | 522.8 | 523.7 |
| 66 | 529.4 | 529.4 | 529.3 | 531.4 | 528.7 | 529.7 |
| 67 | 536.7 | 536.5 | 537.0 | 536.7 | 536.8 | 537.3 |
| 68 | 546.0 | 547.2 | 547.1 | 548.3 | 546.3 | 546.5 |
| 69 | 550.9 | 549.6 | 551.6 | 552.0 | 547.9 | 547.3 |
| 70 | 569.7 | 569.4 | 569.9 | 569.3 | 569.3 | 569.0 |
| 71 | 572.5 | 571.4 | 572.3 | 572.2 | 571.2 | 571.1 |
| 72 | 603.8 | 602.8 | 603.2 | 604.8 | 603.7 | 602.8 |
| 73 | 604.8 | 604.0 | 604.9 | 606.9 | 604.1 | 604.2 |
| 74 | 615.9 | 614.0 | 615.8 | 616.2 | 613.9 | 613.8 |
| 75 | 618.9 | 618.8 | 619.3 | 622.3 | 618.6 | 618.3 |
| 76 | 631.8 | 631.5 | 631.7 | 631.6 | 630.8 | 630.6 |
| 77 | 631.8 | 631.7 | 632.2 | 632.2 | 631.7 | 631.7 |

---



---

|     |       |       |       |       |       |       |
|-----|-------|-------|-------|-------|-------|-------|
| 78  | 643.7 | 642.8 | 642.9 | 636.4 | 643.6 | 643.4 |
| 79  | 651.5 | 651.3 | 651.4 | 647.1 | 651.8 | 651.5 |
| 80  | 654.7 | 655.0 | 654.7 | 651.8 | 655.0 | 654.7 |
| 81  | 658.1 | 658.9 | 658.4 | 656.3 | 659.1 | 658.2 |
| 82  | 681.8 | 679.4 | 681.9 | 662.1 | 679.5 | 680.6 |
| 83  | 682.5 | 681.7 | 682.4 | 682.5 | 681.9 | 682.0 |
| 84  | 685.5 | 685.6 | 685.4 | 684.5 | 685.4 | 686.2 |
| 85  | 692.8 | 695.4 | 692.6 | 692.6 | 695.1 | 695.7 |
| 86  | 696.1 | 696.0 | 696.9 | 694.9 | 695.6 | 696.2 |
| 87  | 710.2 | 710.2 | 710.6 | 708.6 | 710.8 | 709.8 |
| 88  | 712.8 | 712.2 | 712.9 | 711.2 | 712.5 | 712.4 |
| 89  | 713.2 | 713.2 | 713.3 | 712.6 | 713.3 | 714.4 |
| 90  | 727.1 | 719.8 | 727.2 | 726.4 | 719.6 | 719.3 |
| 91  | 735.7 | 735.4 | 735.8 | 741.7 | 735.5 | 735.1 |
| 92  | 741.8 | 741.5 | 741.7 | 742.5 | 741.5 | 741.8 |
| 93  | 747.3 | 747.4 | 747.8 | 747.3 | 746.4 | 747.6 |
| 94  | 773.5 | 773.6 | 773.4 | 773.3 | 774.0 | 773.5 |
| 95  | 783.9 | 784.2 | 784.0 | 782.3 | 783.6 | 783.3 |
| 96  | 784.6 | 796.3 | 784.7 | 784.2 | 796.4 | 795.8 |
| 97  | 812.0 | 811.5 | 812.1 | 809.0 | 811.7 | 811.5 |
| 98  | 813.8 | 813.6 | 813.8 | 810.4 | 813.7 | 813.6 |
| 99  | 817.2 | 816.8 | 817.0 | 817.1 | 817.0 | 816.9 |
| 100 | 830.2 | 829.7 | 830.4 | 829.5 | 830.1 | 829.9 |
| 101 | 834.0 | 830.3 | 833.0 | 833.6 | 831.1 | 830.3 |
| 102 | 835.6 | 834.0 | 834.0 | 834.0 | 834.7 | 834.1 |
| 103 | 836.0 | 837.2 | 837.6 | 836.5 | 836.0 | 837.6 |
| 104 | 840.6 | 841.3 | 841.1 | 839.1 | 841.6 | 840.8 |
| 105 | 846.9 | 846.3 | 847.1 | 845.7 | 847.7 | 847.0 |
| 106 | 850.7 | 849.8 | 849.8 | 849.6 | 850.8 | 850.4 |
| 107 | 857.2 | 858.6 | 857.8 | 858.2 | 857.4 | 857.5 |
| 108 | 858.1 | 859.5 | 858.8 | 859.1 | 859.4 | 858.9 |
| 109 | 862.6 | 864.2 | 862.6 | 860.8 | 863.9 | 863.8 |
| 110 | 879.0 | 878.6 | 879.2 | 867.7 | 879.1 | 878.8 |
| 111 | 898.1 | 898.3 | 898.1 | 901.8 | 898.7 | 898.2 |
| 112 | 902.8 | 902.5 | 902.8 | 906.3 | 902.4 | 902.2 |
| 113 | 911.8 | 912.1 | 912.5 | 912.1 | 912.6 | 912.1 |
| 114 | 914.1 | 913.8 | 914.0 | 913.7 | 914.0 | 914.0 |
| 115 | 930.6 | 931.4 | 931.8 | 931.3 | 931.0 | 931.1 |
| 116 | 936.9 | 936.3 | 935.9 | 936.3 | 936.0 | 936.9 |
| 117 | 943.7 | 943.7 | 944.0 | 943.2 | 944.6 | 943.3 |
| 118 | 954.8 | 963.9 | 956.6 | 960.2 | 959.2 | 956.2 |
| 119 | 963.7 | 965.3 | 964.0 | 964.1 | 964.7 | 964.5 |
| 120 | 967.9 | 968.7 | 967.7 | 968.1 | 967.9 | 968.2 |
| 121 | 969.4 | 970.2 | 968.4 | 969.0 | 970.1 | 969.3 |
| 122 | 974.6 | 974.5 | 974.4 | 974.5 | 974.9 | 974.8 |
| 123 | 980.4 | 980.5 | 981.0 | 979.9 | 981.7 | 980.7 |
| 124 | 982.1 | 981.8 | 981.9 | 981.7 | 982.0 | 982.0 |

---

---

|     |        |        |        |        |        |        |
|-----|--------|--------|--------|--------|--------|--------|
| 125 | 982.1  | 982.3  | 982.6  | 982.4  | 982.4  | 982.1  |
| 126 | 995.4  | 995.6  | 994.7  | 995.8  | 995.7  | 995.1  |
| 127 | 998.8  | 998.6  | 998.8  | 998.2  | 999.1  | 998.5  |
| 128 | 1001.7 | 1001.5 | 1002.1 | 1005.8 | 1002.0 | 1002.0 |
| 129 | 1004.3 | 1005.2 | 1004.5 | 1007.7 | 1005.7 | 1004.1 |
| 130 | 1013.9 | 1014.1 | 1013.9 | 1013.9 | 1014.1 | 1013.9 |
| 131 | 1024.5 | 1024.6 | 1024.5 | 1025.3 | 1024.6 | 1024.6 |
| 132 | 1029.8 | 1029.4 | 1029.6 | 1029.3 | 1029.5 | 1029.6 |
| 133 | 1033.4 | 1033.1 | 1033.3 | 1035.6 | 1033.1 | 1033.1 |
| 134 | 1041.4 | 1042.2 | 1041.4 | 1042.2 | 1042.3 | 1041.3 |
| 135 | 1044.7 | 1044.8 | 1045.1 | 1044.8 | 1044.8 | 1044.4 |
| 136 | 1047.9 | 1047.8 | 1047.9 | 1047.7 | 1047.7 | 1047.9 |
| 137 | 1069.8 | 1069.8 | 1069.7 | 1076.1 | 1069.9 | 1069.9 |
| 138 | 1075.6 | 1076.3 | 1075.6 | 1078.9 | 1076.2 | 1076.0 |
| 139 | 1079.8 | 1079.6 | 1079.5 | 1082.3 | 1079.6 | 1079.8 |
| 140 | 1082.3 | 1082.4 | 1082.3 | 1098.9 | 1082.4 | 1083.6 |
| 141 | 1103.8 | 1103.4 | 1103.8 | 1103.5 | 1103.2 | 1103.8 |
| 142 | 1104.4 | 1105.4 | 1104.2 | 1115.3 | 1105.3 | 1105.0 |
| 143 | 1116.9 | 1117.1 | 1117.5 | 1117.6 | 1117.6 | 1118.2 |
| 144 | 1140.1 | 1140.8 | 1140.6 | 1141.1 | 1140.8 | 1140.3 |
| 145 | 1143.1 | 1142.7 | 1142.8 | 1142.9 | 1142.9 | 1142.7 |
| 146 | 1147.9 | 1148.4 | 1148.4 | 1148.3 | 1148.9 | 1147.9 |
| 147 | 1160.0 | 1159.9 | 1160.1 | 1159.8 | 1160.1 | 1159.5 |
| 148 | 1173.8 | 1173.2 | 1173.7 | 1174.3 | 1172.8 | 1174.6 |
| 149 | 1178.5 | 1178.0 | 1178.6 | 1178.1 | 1178.2 | 1178.5 |
| 150 | 1188.2 | 1188.4 | 1188.3 | 1187.5 | 1188.3 | 1188.2 |
| 151 | 1191.3 | 1191.5 | 1191.5 | 1191.3 | 1191.5 | 1191.3 |
| 152 | 1196.3 | 1196.0 | 1196.2 | 1195.6 | 1195.9 | 1196.3 |
| 153 | 1202.8 | 1203.8 | 1203.1 | 1203.3 | 1203.9 | 1203.2 |
| 154 | 1206.7 | 1207.4 | 1206.4 | 1206.6 | 1207.4 | 1207.3 |
| 155 | 1220.6 | 1220.5 | 1220.8 | 1220.5 | 1220.7 | 1220.7 |
| 156 | 1235.6 | 1222.3 | 1235.4 | 1234.2 | 1222.3 | 1222.3 |
| 157 | 1248.6 | 1247.1 | 1248.4 | 1252.9 | 1247.6 | 1247.1 |
| 158 | 1269.3 | 1269.3 | 1269.9 | 1261.9 | 1270.1 | 1269.3 |
| 159 | 1272.4 | 1281.3 | 1272.6 | 1269.5 | 1281.4 | 1280.8 |
| 160 | 1286.8 | 1286.9 | 1287.3 | 1272.9 | 1286.8 | 1286.0 |
| 161 | 1289.2 | 1289.8 | 1289.8 | 1287.2 | 1290.2 | 1289.2 |
| 162 | 1292.8 | 1292.7 | 1292.1 | 1292.8 | 1291.6 | 1292.7 |
| 163 | 1296.9 | 1296.2 | 1297.3 | 1293.4 | 1297.2 | 1297.0 |
| 164 | 1300.9 | 1301.8 | 1301.5 | 1298.4 | 1302.0 | 1301.1 |
| 165 | 1304.9 | 1304.2 | 1304.7 | 1302.0 | 1304.5 | 1304.8 |
| 166 | 1311.4 | 1312.2 | 1311.3 | 1315.8 | 1312.2 | 1311.8 |
| 167 | 1319.6 | 1319.6 | 1319.5 | 1321.6 | 1319.5 | 1319.3 |
| 168 | 1326.1 | 1326.0 | 1326.1 | 1326.6 | 1326.0 | 1325.7 |
| 169 | 1330.9 | 1329.7 | 1330.8 | 1329.6 | 1329.7 | 1329.4 |
| 170 | 1332.8 | 1332.5 | 1332.8 | 1342.1 | 1332.6 | 1332.4 |
| 171 | 1341.3 | 1341.7 | 1341.3 | 1342.7 | 1341.8 | 1341.1 |

---

|     |        |        |        |        |        |        |
|-----|--------|--------|--------|--------|--------|--------|
| 172 | 1344.4 | 1344.1 | 1344.4 | 1349.3 | 1344.5 | 1344.6 |
| 173 | 1350.9 | 1350.6 | 1351.0 | 1351.7 | 1351.1 | 1350.9 |
| 174 | 1354.7 | 1355.5 | 1355.1 | 1357.8 | 1355.8 | 1354.8 |
| 175 | 1358.9 | 1358.1 | 1358.8 | 1360.4 | 1357.8 | 1358.8 |
| 176 | 1365.4 | 1367.4 | 1365.6 | 1370.2 | 1367.4 | 1367.3 |
| 177 | 1371.9 | 1371.1 | 1371.5 | 1372.5 | 1370.8 | 1371.0 |
| 178 | 1390.5 | 1390.0 | 1390.4 | 1386.1 | 1390.0 | 1389.9 |
| 179 | 1390.9 | 1390.9 | 1391.1 | 1390.9 | 1390.9 | 1391.8 |
| 180 | 1394.5 | 1393.9 | 1394.9 | 1394.5 | 1395.5 | 1394.5 |
| 181 | 1405.1 | 1401.0 | 1405.0 | 1403.3 | 1401.2 | 1400.9 |
| 182 | 1407.9 | 1409.2 | 1408.0 | 1408.7 | 1409.3 | 1408.1 |
| 183 | 1409.7 | 1418.2 | 1409.8 | 1410.1 | 1418.0 | 1417.5 |
| 184 | 1433.4 | 1440.4 | 1433.3 | 1434.0 | 1440.5 | 1438.9 |
| 185 | 1443.5 | 1443.9 | 1443.3 | 1443.8 | 1443.8 | 1443.8 |
| 186 | 1444.7 | 1445.1 | 1444.5 | 1446.6 | 1445.3 | 1445.2 |
| 187 | 1455.0 | 1454.8 | 1455.4 | 1455.1 | 1454.8 | 1454.2 |
| 188 | 1458.3 | 1456.5 | 1458.1 | 1459.0 | 1456.8 | 1455.9 |
| 189 | 1462.2 | 1458.5 | 1462.2 | 1463.6 | 1458.6 | 1458.3 |
| 190 | 1478.3 | 1462.5 | 1478.5 | 1478.9 | 1462.8 | 1462.3 |
| 191 | 1479.3 | 1479.1 | 1479.5 | 1479.6 | 1479.2 | 1478.9 |
| 192 | 1484.8 | 1484.4 | 1484.6 | 1484.6 | 1484.2 | 1484.8 |
| 193 | 1489.4 | 1489.5 | 1490.1 | 1490.1 | 1490.3 | 1489.8 |
| 194 | 1492.3 | 1492.1 | 1492.9 | 1492.7 | 1493.1 | 1492.6 |
| 195 | 1498.4 | 1498.9 | 1498.7 | 1498.8 | 1498.8 | 1498.5 |
| 196 | 1518.2 | 1518.0 | 1518.0 | 1518.0 | 1518.3 | 1517.6 |
| 197 | 1521.5 | 1521.3 | 1521.6 | 1521.3 | 1521.4 | 1521.6 |
| 198 | 1530.5 | 1534.1 | 1530.3 | 1531.9 | 1534.0 | 1533.9 |
| 199 | 1537.6 | 1544.3 | 1537.4 | 1536.7 | 1544.2 | 1544.1 |
| 200 | 1545.0 | 1545.9 | 1545.0 | 1544.7 | 1546.2 | 1545.9 |
| 201 | 1551.6 | 1554.4 | 1551.4 | 1549.9 | 1554.4 | 1554.4 |
| 202 | 1584.1 | 1583.0 | 1583.9 | 1583.2 | 1582.8 | 1583.6 |
| 203 | 1590.9 | 1585.1 | 1590.7 | 1589.9 | 1585.1 | 1584.8 |
| 204 | 1594.8 | 1594.8 | 1594.7 | 1594.4 | 1595.1 | 1594.5 |
| 205 | 1605.0 | 1604.9 | 1605.0 | 1598.7 | 1604.9 | 1604.8 |
| 206 | 1618.0 | 1617.8 | 1618.1 | 1617.0 | 1617.7 | 1617.9 |
| 207 | 1620.2 | 1620.1 | 1620.2 | 1620.0 | 1620.1 | 1620.1 |
| 208 | 1626.1 | 1625.9 | 1625.9 | 1625.7 | 1626.0 | 1625.6 |
| 209 | 1630.9 | 1631.0 | 1630.9 | 1631.9 | 1630.9 | 1631.0 |
| 210 | 1635.6 | 1635.8 | 1635.5 | 1636.6 | 1635.9 | 1635.6 |
| 211 | 1644.0 | 1644.7 | 1644.0 | 1643.7 | 1644.7 | 1644.7 |
| 212 | 1644.6 | 1646.7 | 1644.5 | 1645.3 | 1646.5 | 1646.2 |
| 213 | 1649.5 | 1649.8 | 1649.4 | 1647.5 | 1649.8 | 1649.8 |
| 214 | 1674.3 | 1674.3 | 1674.3 | 1671.9 | 1674.3 | 1674.3 |
| 215 | 1783.4 | 1782.9 | 1783.5 | 1783.7 | 1783.0 | 1783.4 |
| 216 | 2326.4 | 2326.0 | 2326.2 | 2326.4 | 2325.9 | 2326.0 |
| 217 | 3022.6 | 3022.6 | 3023.0 | 3022.7 | 3022.9 | 3022.5 |
| 218 | 3034.5 | 3034.3 | 3034.5 | 3034.2 | 3034.5 | 3033.8 |

|     |        |        |        |        |        |        |
|-----|--------|--------|--------|--------|--------|--------|
| 219 | 3061.8 | 3061.8 | 3062.3 | 3062.8 | 3061.8 | 3061.6 |
| 220 | 3118.2 | 3119.0 | 3119.4 | 3118.6 | 3119.3 | 3119.0 |
| 221 | 3122.0 | 3121.5 | 3121.8 | 3121.2 | 3121.3 | 3120.9 |
| 222 | 3135.1 | 3136.9 | 3136.2 | 3137.8 | 3136.5 | 3134.7 |
| 223 | 3138.3 | 3139.3 | 3139.0 | 3139.1 | 3137.5 | 3135.3 |
| 224 | 3142.5 | 3142.3 | 3142.7 | 3142.6 | 3142.0 | 3142.1 |
| 225 | 3160.9 | 3161.5 | 3161.4 | 3162.7 | 3161.2 | 3161.4 |
| 226 | 3163.0 | 3162.8 | 3163.1 | 3163.6 | 3162.9 | 3162.7 |
| 227 | 3164.0 | 3163.9 | 3164.0 | 3168.7 | 3164.1 | 3163.8 |
| 228 | 3170.0 | 3168.9 | 3169.2 | 3169.4 | 3170.1 | 3168.8 |
| 229 | 3171.4 | 3171.4 | 3171.5 | 3171.0 | 3171.5 | 3171.3 |
| 230 | 3173.1 | 3174.6 | 3173.8 | 3173.1 | 3173.3 | 3171.5 |
| 231 | 3177.5 | 3177.0 | 3177.5 | 3173.9 | 3177.4 | 3177.4 |
| 232 | 3178.5 | 3178.3 | 3178.6 | 3175.3 | 3177.9 | 3178.1 |
| 233 | 3182.9 | 3183.7 | 3182.7 | 3178.7 | 3183.9 | 3183.2 |
| 234 | 3184.7 | 3184.5 | 3184.7 | 3184.5 | 3184.6 | 3184.6 |
| 235 | 3185.2 | 3185.3 | 3184.9 | 3185.2 | 3185.5 | 3185.3 |
| 236 | 3191.2 | 3191.1 | 3191.1 | 3191.1 | 3191.0 | 3191.2 |
| 237 | 3191.6 | 3191.9 | 3191.8 | 3191.6 | 3192.2 | 3191.5 |
| 238 | 3193.7 | 3193.4 | 3193.6 | 3192.3 | 3193.5 | 3193.5 |
| 239 | 3195.1 | 3194.6 | 3195.1 | 3193.9 | 3194.9 | 3194.8 |
| 240 | 3195.2 | 3195.1 | 3195.2 | 3195.0 | 3195.1 | 3195.0 |
| 241 | 3196.0 | 3197.1 | 3195.9 | 3195.7 | 3197.2 | 3196.1 |
| 242 | 3217.1 | 3217.2 | 3217.4 | 3217.8 | 3218.3 | 3220.6 |
| 243 | 3243.8 | 3243.9 | 3244.0 | 3245.4 | 3243.8 | 3242.9 |
| 244 | 3257.5 | 3257.5 | 3257.5 | 3257.3 | 3257.4 | 3257.6 |
| 245 | 3571.9 | 3573.3 | 3571.8 | 3570.7 | 3573.0 | 3573.5 |
| 246 | 3768.6 | 3767.6 | 3768.2 | 3767.8 | 3767.7 | 3767.9 |

in dichloromethane

| Freq. # | conf1 | conf3 | conf4 | conf5 | conf8 | conf9 |
|---------|-------|-------|-------|-------|-------|-------|
| 1       | 3.9   | 2.6   | 4.3   | 4.4   | 4.1   | 3.7   |
| 2       | 7.6   | 7.3   | 7.4   | 7.2   | 8.4   | 8.1   |
| 3       | 9.3   | 8.7   | 10.6  | 8.6   | 13.0  | 8.6   |
| 4       | 14.5  | 15.2  | 13.1  | 13.2  | 14.7  | 13.6  |
| 5       | 18.2  | 17.7  | 18.7  | 18.1  | 17.2  | 17.9  |
| 6       | 20.1  | 19.6  | 19.2  | 19.3  | 19.1  | 18.6  |
| 7       | 23.5  | 23.0  | 23.2  | 23.8  | 21.4  | 23.8  |
| 8       | 30.2  | 29.9  | 30.2  | 32.1  | 31.1  | 30.6  |
| 9       | 34.9  | 36.5  | 37.9  | 36.2  | 36.9  | 35.0  |
| 10      | 40.8  | 38.33 | 339.8 | 36.8  | 38.9  | 40.7  |
| 11      | 45.8  | 46.8  | 45.3  | 49.0  | 45.5  | 45.6  |
| 12      | 48.4  | 53.3  | 52.6  | 50.1  | 50.2  | 50.5  |
| 13      | 53.4  | 54.6  | 55.1  | 55.6  | 54.8  | 52.1  |
| 14      | 56.7  | 57.0  | 56.2  | 56.9  | 57.7  | 53.3  |
| 15      | 64.5  | 66.8  | 65.4  | 63.0  | 65.4  | 64.9  |

---

|    |        |       |       |       |       |       |
|----|--------|-------|-------|-------|-------|-------|
| 16 | 67.8   | 67.8  | 69.1  | 65.4  | 69.3  | 67.3  |
| 17 | 74.0   | 72.7  | 72.7  | 73.0  | 70.8  | 73.3  |
| 18 | 78.0   | 77.9  | 80.9  | 78.4  | 80.9  | 79.0  |
| 19 | 82.5   | 83.5  | 82.9  | 84.3  | 85.9  | 82.8  |
| 20 | 92.3   | 93.8  | 89.7  | 96.7  | 93.9  | 93.3  |
| 21 | 97.0   | 98.4  | 97.2  | 101.5 | 98.3  | 97.5  |
| 22 | 111.9  | 111.5 | 112.6 | 111.5 | 112.2 | 109.9 |
| 23 | 119.4  | 118.9 | 119.2 | 117.0 | 115.7 | 117.4 |
| 24 | 133.0  | 133.7 | 134.1 | 129.4 | 134.4 | 133.2 |
| 25 | 134.3  | 140.7 | 137.3 | 139.7 | 140.7 | 138.8 |
| 26 | 144.4  | 146.7 | 142.6 | 149.5 | 146.9 | 146.0 |
| 27 | 147.2  | 147.5 | 147.3 | 150.8 | 147.7 | 150.0 |
| 28 | 164.8  | 159.3 | 165.6 | 162.3 | 159.3 | 158.8 |
| 29 | 178.2  | 164.7 | 177.0 | 177.4 | 167.3 | 169.1 |
| 30 | 181.7  | 174.3 | 181.3 | 194.7 | 181.4 | 174.1 |
| 31 | 195.0  | 199.0 | 189.2 | 198.4 | 193.8 | 198.4 |
| 32 | 205.9  | 204.9 | 204.6 | 208.7 | 206.6 | 205.2 |
| 33 | 213.9  | 222.0 | 213.1 | 214.8 | 222.6 | 224.5 |
| 34 | 218.8  | 233.0 | 228.4 | 224.4 | 232.5 | 234.2 |
| 35 | 231.1  | 242.3 | 233.7 | 230.0 | 239.8 | 240.6 |
| 36 | 240.1  | 259.3 | 246.1 | 247.6 | 260.0 | 257.9 |
| 37 | 278.4  | 260.9 | 276.3 | 278.4 | 265.8 | 259.6 |
| 38 | 281.2  | 279.7 | 278.1 | 281.4 | 279.5 | 279.3 |
| 39 | 301.2  | 286.5 | 298.6 | 298.4 | 280.5 | 284.6 |
| 40 | 302.2  | 299.6 | 302.9 | 301.8 | 301.7 | 300.0 |
| 41 | 309.4  | 303.6 | 305.0 | 306.1 | 307.5 | 303.0 |
| 42 | 327.5  | 322.4 | 331.8 | 327.7 | 321.7 | 317.6 |
| 43 | 337.7  | 332.1 | 335.0 | 333.2 | 330.3 | 332.6 |
| 44 | 338.9  | 343.8 | 339.8 | 350.5 | 339.2 | 346.2 |
| 45 | 346.9  | 347.0 | 347.1 | 354.1 | 347.2 | 350.1 |
| 46 | 357.6  | 360.1 | 363.6 | 359.6 | 358.2 | 360.2 |
| 47 | 363.7  | 374.2 | 371.6 | 366.6 | 381.3 | 373.0 |
| 48 | 382.2  | 385.2 | 376.4 | 379.3 | 386.5 | 376.3 |
| 49 | 390.4  | 388.9 | 387.5 | 395.1 | 390.3 | 393.4 |
| 50 | 396.1  | 395.9 | 395.7 | 412.0 | 396.0 | 398.5 |
| 51 | 410.6  | 405.2 | 411.3 | 417.6 | 406.1 | 405.6 |
| 52 | 419.4  | 420.0 | 420.1 | 420.0 | 420.1 | 419.1 |
| 53 | 420.9  | 420.2 | 421.3 | 421.6 | 420.5 | 420.8 |
| 54 | 424.7  | 425.1 | 425.3 | 424.6 | 425.1 | 424.3 |
| 55 | 425.8  | 427.4 | 426.7 | 426.9 | 427.1 | 426.4 |
| 56 | 438.1  | 437.7 | 437.0 | 437.5 | 433.6 | 438.4 |
| 57 | 440.34 | 3441. | 441.2 | 442.8 | 441.6 | 442.2 |
| 58 | 445.0  | 4     | 447.6 | 446.6 | 442.4 | 448.2 |
| 59 | 452.7  | 449.3 | 452.3 | 450.0 | 457.5 | 449.5 |
| 60 | 472.6  | 452.1 | 468.8 | 467.7 | 474.1 | 468.3 |
| 61 | 499.6  | 469.2 | 500.9 | 501.2 | 499.8 | 501.5 |
| 62 | 507.5  | 501.4 | 507.0 | 506.8 | 507.2 | 506.7 |

---

---

|     |       |       |       |       |       |       |
|-----|-------|-------|-------|-------|-------|-------|
| 63  | 512.4 | 515.1 | 512.6 | 513.8 | 514.7 | 513.8 |
| 64  | 521.0 | 520.7 | 520.9 | 521.4 | 521.5 | 519.9 |
| 65  | 523.4 | 521.6 | 523.7 | 526.4 | 522.3 | 523.6 |
| 66  | 528.9 | 529.1 | 529.2 | 531.4 | 528.5 | 529.4 |
| 67  | 536.5 | 536.2 | 536.8 | 536.3 | 536.5 | 537.1 |
| 68  | 544.4 | 543.7 | 544.4 | 545.8 | 544.0 | 542.6 |
| 69  | 545.3 | 546.6 | 546.4 | 547.7 | 545.7 | 546.9 |
| 70  | 569.4 | 569.1 | 569.5 | 569.0 | 568.9 | 568.6 |
| 71  | 572.5 | 571.3 | 572.3 | 572.0 | 571.2 | 571.1 |
| 72  | 603.2 | 602.2 | 602.6 | 604.7 | 603.0 | 602.4 |
| 73  | 605.1 | 604.7 | 605.0 | 606.4 | 604.7 | 604.5 |
| 74  | 615.1 | 613.3 | 615.1 | 615.3 | 613.3 | 613.2 |
| 75  | 619.7 | 619.6 | 619.8 | 622.8 | 619.5 | 619.1 |
| 76  | 630.6 | 630.5 | 630.9 | 630.7 | 630.1 | 630.1 |
| 77  | 631.2 | 631.1 | 631.1 | 631.1 | 631.1 | 631.1 |
| 78  | 643.2 | 642.3 | 642.4 | 636.1 | 643.1 | 642.9 |
| 79  | 650.9 | 650.7 | 650.8 | 646.4 | 651.2 | 650.8 |
| 80  | 654.4 | 654.5 | 654.3 | 651.1 | 654.7 | 654.5 |
| 81  | 657.4 | 658.2 | 657.7 | 656.1 | 658.5 | 657.5 |
| 82  | 676.3 | 677.5 | 678.3 | 661.5 | 678.0 | 678.0 |
| 83  | 681.9 | 679.2 | 681.9 | 677.0 | 679.4 | 680.6 |
| 84  | 685.2 | 685.6 | 685.0 | 684.1 | 685.4 | 686.0 |
| 85  | 687.9 | 688.2 | 688.6 | 688.6 | 688.3 | 688.3 |
| 86  | 692.4 | 696.0 | 692.2 | 692.9 | 695.0 | 695.5 |
| 87  | 709.7 | 709.8 | 710.1 | 708.2 | 710.4 | 709.5 |
| 88  | 712.3 | 712.0 | 712.4 | 710.9 | 712.2 | 712.1 |
| 89  | 712.9 | 713.0 | 712.8 | 712.5 | 712.9 | 714.1 |
| 90  | 726.5 | 718.6 | 726.6 | 725.7 | 718.6 | 718.3 |
| 91  | 734.9 | 734.6 | 734.9 | 741.5 | 734.6 | 734.4 |
| 92  | 741.4 | 741.2 | 741.4 | 741.6 | 741.3 | 741.4 |
| 93  | 746.7 | 746.7 | 747.2 | 746.6 | 745.9 | 747.1 |
| 94  | 773.7 | 773.9 | 773.7 | 773.7 | 774.3 | 773.9 |
| 95  | 782.9 | 783.1 | 783.2 | 781.8 | 782.8 | 782.3 |
| 96  | 783.9 | 795.7 | 783.9 | 783.1 | 795.7 | 795.3 |
| 97  | 810.7 | 810.3 | 810.8 | 808.5 | 810.4 | 810.1 |
| 98  | 813.8 | 813.6 | 813.7 | 809.3 | 813.7 | 813.7 |
| 99  | 816.6 | 816.4 | 816.2 | 816.6 | 816.7 | 816.6 |
| 100 | 830.6 | 829.2 | 830.5 | 829.6 | 829.2 | 829.1 |
| 101 | 833.0 | 830.0 | 831.9 | 832.2 | 831.3 | 830.4 |
| 102 | 833.2 | 832.3 | 833.0 | 833.1 | 833.3 | 832.8 |
| 103 | 835.6 | 836.2 | 836.4 | 835.7 | 834.7 | 836.6 |
| 104 | 840.5 | 840.6 | 840.8 | 838.6 | 841.0 | 840.7 |
| 105 | 846.4 | 845.6 | 846.0 | 845.2 | 847.2 | 846.6 |
| 106 | 849.3 | 848.6 | 848.8 | 848.4 | 849.5 | 849.3 |
| 107 | 855.1 | 856.7 | 856.5 | 856.4 | 855.4 | 855.7 |
| 108 | 857.7 | 858.2 | 857.5 | 858.6 | 858.1 | 857.7 |
| 109 | 863.2 | 864.9 | 863.3 | 861.1 | 864.8 | 864.5 |

---

---

|     |        |        |        |        |        |        |
|-----|--------|--------|--------|--------|--------|--------|
| 110 | 878.3  | 877.8  | 878.5  | 867.9  | 878.4  | 878.1  |
| 111 | 899.2  | 898.9  | 898.9  | 902.2  | 899.4  | 899.0  |
| 112 | 902.4  | 901.9  | 902.3  | 905.9  | 902.0  | 901.9  |
| 113 | 912.2  | 912.6  | 913.0  | 912.5  | 913.2  | 912.6  |
| 114 | 914.4  | 914.2  | 914.3  | 914.0  | 914.4  | 914.4  |
| 115 | 927.9  | 928.5  | 928.8  | 928.4  | 928.2  | 928.2  |
| 116 | 936.0  | 935.7  | 935.3  | 935.7  | 935.3  | 936.3  |
| 117 | 943.9  | 944.1  | 944.2  | 943.7  | 944.9  | 943.7  |
| 118 | 956.3  | 963.5  | 959.5  | 957.1  | 962.9  | 958.1  |
| 119 | 964.8  | 965.0  | 965.1  | 965.1  | 965.7  | 965.2  |
| 120 | 968.5  | 969.0  | 968.2  | 968.8  | 968.5  | 968.4  |
| 121 | 970.1  | 969.7  | 969.2  | 969.7  | 969.7  | 969.6  |
| 122 | 976.8  | 976.6  | 976.7  | 976.7  | 977.1  | 977.1  |
| 123 | 981.2  | 980.9  | 981.4  | 980.5  | 980.9  | 981.0  |
| 124 | 981.5  | 981.7  | 982.1  | 981.7  | 982.8  | 982.5  |
| 125 | 984.3  | 984.1  | 984.1  | 984.1  | 984.6  | 984.3  |
| 126 | 995.7  | 995.3  | 994.2  | 995.4  | 995.9  | 995.7  |
| 127 | 1001.8 | 1001.3 | 1001.8 | 1001.6 | 1002.2 | 1001.9 |
| 128 | 1002.1 | 1001.9 | 1002.1 | 1006.6 | 1002.3 | 1002.1 |
| 129 | 1005.4 | 1005.9 | 1006.5 | 1007.3 | 1006.6 | 1005.4 |
| 130 | 1013.2 | 1013.4 | 1013.2 | 1013.3 | 1013.5 | 1013.2 |
| 131 | 1023.5 | 1023.6 | 1023.6 | 1024.2 | 1023.6 | 1023.8 |
| 132 | 1028.3 | 1027.9 | 1028.2 | 1027.7 | 1028.0 | 1028.1 |
| 133 | 1034.2 | 1034.1 | 1034.2 | 1036.4 | 1034.2 | 1034.2 |
| 134 | 1040.7 | 1040.8 | 1041.0 | 1040.7 | 1040.7 | 1040.4 |
| 135 | 1040.9 | 1042.1 | 1041.0 | 1043.0 | 1042.3 | 1041.4 |
| 136 | 1046.6 | 1046.6 | 1046.5 | 1046.6 | 1046.4 | 1046.6 |
| 137 | 1068.9 | 1068.7 | 1068.8 | 1076.9 | 1068.8 | 1068.8 |
| 138 | 1076.7 | 1076.9 | 1077.0 | 1078.5 | 1077.0 | 1078.1 |
| 139 | 1079.2 | 1079.5 | 1079.3 | 1080.3 | 1079.4 | 1079.5 |
| 140 | 1079.8 | 1080.2 | 1079.9 | 1098.2 | 1080.2 | 1079.9 |
| 141 | 1102.4 | 1102.0 | 1102.3 | 1102.2 | 1101.7 | 1102.3 |
| 142 | 1103.9 | 1105.1 | 1103.8 | 1114.0 | 1105.0 | 1104.6 |
| 143 | 1115.8 | 1115.7 | 1116.2 | 1115.9 | 1116.2 | 1116.5 |
| 144 | 1139.5 | 1139.6 | 1140.2 | 1140.3 | 1140.0 | 1140.0 |
| 145 | 1142.0 | 1141.6 | 1142.3 | 1141.9 | 1141.8 | 1141.7 |
| 146 | 1146.3 | 1147.2 | 1147.2 | 1146.4 | 1147.4 | 1146.4 |
| 147 | 1158.1 | 1158.2 | 1158.4 | 1158.0 | 1158.2 | 1157.8 |
| 148 | 1169.0 | 1169.5 | 1168.7 | 1170.0 | 1168.7 | 1169.8 |
| 149 | 1175.7 | 1175.8 | 1176.3 | 1175.9 | 1175.8 | 1175.9 |
| 150 | 1186.6 | 1186.8 | 1186.7 | 1186.1 | 1186.9 | 1186.6 |
| 151 | 1189.6 | 1189.8 | 1189.6 | 1189.5 | 1190.1 | 1189.7 |
| 152 | 1194.1 | 1193.9 | 1194.1 | 1193.6 | 1193.8 | 1194.1 |
| 153 | 1201.5 | 1202.6 | 1202.1 | 1201.9 | 1202.5 | 1201.9 |
| 154 | 1205.3 | 1205.9 | 1205.3 | 1205.4 | 1205.9 | 1205.8 |
| 155 | 1218.8 | 1218.9 | 1219.4 | 1218.5 | 1218.9 | 1219.0 |
| 156 | 1235.2 | 1222.4 | 1235.0 | 1234.0 | 1222.4 | 1222.3 |

---

---

|     |        |        |        |        |        |        |
|-----|--------|--------|--------|--------|--------|--------|
| 157 | 1248.4 | 1246.9 | 1248.2 | 1252.0 | 1247.4 | 1247.0 |
| 158 | 1268.6 | 1268.5 | 1269.3 | 1261.1 | 1268.9 | 1268.3 |
| 159 | 1271.4 | 1280.8 | 1271.6 | 1268.3 | 1281.4 | 1280.9 |
| 160 | 1285.9 | 1285.8 | 1286.4 | 1272.2 | 1285.7 | 1285.2 |
| 161 | 1287.4 | 1288.7 | 1287.7 | 1286.2 | 1288.6 | 1287.5 |
| 162 | 1291.3 | 1290.6 | 1291.0 | 1290.8 | 1289.9 | 1291.1 |
| 163 | 1296.0 | 1295.8 | 1297.0 | 1292.0 | 1296.3 | 1296.0 |
| 164 | 1299.5 | 1300.6 | 1299.8 | 1297.7 | 1300.6 | 1299.7 |
| 165 | 1304.2 | 1303.6 | 1304.0 | 1300.4 | 1303.8 | 1304.2 |
| 166 | 1310.3 | 1311.6 | 1310.2 | 1314.7 | 1311.5 | 1310.9 |
| 167 | 1319.1 | 1319.2 | 1319.0 | 1320.8 | 1319.0 | 1318.8 |
| 168 | 1324.9 | 1324.8 | 1324.9 | 1325.7 | 1324.8 | 1324.4 |
| 169 | 1330.2 | 1328.0 | 1330.2 | 1329.2 | 1328.1 | 1327.9 |
| 170 | 1331.7 | 1331.6 | 1331.6 | 1340.0 | 1331.8 | 1331.7 |
| 171 | 1340.1 | 1340.4 | 1340.2 | 1340.8 | 1340.6 | 1339.9 |
| 172 | 1343.3 | 1342.6 | 1343.3 | 1348.4 | 1343.1 | 1343.5 |
| 173 | 1349.9 | 1349.7 | 1350.0 | 1351.0 | 1350.0 | 1349.9 |
| 174 | 1354.3 | 1354.6 | 1354.9 | 1356.4 | 1355.1 | 1354.4 |
| 175 | 1357.7 | 1356.7 | 1357.9 | 1358.4 | 1356.5 | 1357.7 |
| 176 | 1364.1 | 1365.9 | 1364.4 | 1369.5 | 1366.0 | 1365.8 |
| 177 | 1371.7 | 1371.5 | 1371.4 | 1373.0 | 1371.3 | 1370.9 |
| 178 | 1388.8 | 1388.5 | 1389.0 | 1385.0 | 1388.5 | 1388.9 |
| 179 | 1389.5 | 1388.9 | 1389.5 | 1388.7 | 1389.0 | 1389.3 |
| 180 | 1394.6 | 1394.4 | 1395.3 | 1394.3 | 1395.3 | 1394.7 |
| 181 | 1404.3 | 1399.3 | 1404.3 | 1402.6 | 1399.7 | 1399.3 |
| 182 | 1406.8 | 1408.8 | 1407.3 | 1408.5 | 1409.2 | 1407.9 |
| 183 | 1408.9 | 1417.0 | 1409.0 | 1410.3 | 1417.3 | 1416.5 |
| 184 | 1431.3 | 1438.7 | 1431.4 | 1433.9 | 1439.1 | 1437.7 |
| 185 | 1441.7 | 1442.4 | 1441.9 | 1442.1 | 1442.1 | 1442.2 |
| 186 | 1443.1 | 1443.9 | 1443.4 | 1444.8 | 1444.1 | 1444.0 |
| 187 | 1453.3 | 1453.3 | 1453.8 | 1453.4 | 1453.4 | 1452.9 |
| 188 | 1456.5 | 1455.1 | 1456.5 | 1457.5 | 1455.8 | 1454.4 |
| 189 | 1460.7 | 1456.8 | 1460.7 | 1461.6 | 1457.1 | 1456.6 |
| 190 | 1474.3 | 1460.9 | 1474.8 | 1475.0 | 1461.2 | 1460.8 |
| 191 | 1478.4 | 1474.5 | 1478.5 | 1480.0 | 1474.9 | 1475.0 |
| 192 | 1483.4 | 1483.2 | 1483.4 | 1483.3 | 1482.9 | 1483.4 |
| 193 | 1487.7 | 1487.7 | 1488.2 | 1488.0 | 1488.4 | 1487.4 |
| 194 | 1490.0 | 1490.1 | 1490.7 | 1490.5 | 1491.0 | 1490.3 |
| 195 | 1493.6 | 1494.1 | 1494.0 | 1494.2 | 1494.0 | 1493.9 |
| 196 | 1516.4 | 1516.1 | 1516.1 | 1516.1 | 1516.4 | 1515.8 |
| 197 | 1519.8 | 1519.8 | 1519.9 | 1519.7 | 1519.8 | 1519.9 |
| 198 | 1526.4 | 1532.3 | 1526.3 | 1527.1 | 1532.3 | 1532.3 |
| 199 | 1534.7 | 1541.7 | 1534.5 | 1534.3 | 1541.6 | 1541.7 |
| 200 | 1543.4 | 1543.7 | 1543.4 | 1543.0 | 1544.1 | 1543.7 |
| 201 | 1549.9 | 1551.9 | 1549.7 | 1548.2 | 1551.9 | 1551.7 |
| 202 | 1582.9 | 1579.9 | 1582.8 | 1581.9 | 1580.0 | 1580.2 |
| 203 | 1587.6 | 1582.6 | 1587.3 | 1586.7 | 1582.6 | 1582.9 |

---



|     |        |        |        |        |        |        |
|-----|--------|--------|--------|--------|--------|--------|
| 204 | 1593.4 | 1593.6 | 1593.4 | 1593.2 | 1593.9 | 1593.3 |
| 205 | 1603.4 | 1603.4 | 1603.4 | 1597.3 | 1603.4 | 1603.4 |
| 206 | 1613.4 | 1614.1 | 1613.6 | 1612.4 | 1614.0 | 1614.1 |
| 207 | 1618.9 | 1618.9 | 1618.9 | 1618.8 | 1618.9 | 1618.9 |
| 208 | 1624.1 | 1623.8 | 1623.8 | 1623.8 | 1623.9 | 1623.7 |
| 209 | 1628.7 | 1628.7 | 1628.7 | 1629.6 | 1628.7 | 1628.8 |
| 210 | 1633.4 | 1633.6 | 1633.4 | 1634.3 | 1633.7 | 1633.3 |
| 211 | 1642.1 | 1643.0 | 1642.2 | 1641.8 | 1643.0 | 1643.0 |
| 212 | 1642.9 | 1644.9 | 1642.9 | 1644.4 | 1644.9 | 1644.5 |
| 213 | 1647.9 | 1648.3 | 1647.9 | 1645.8 | 1648.4 | 1648.3 |
| 214 | 1672.7 | 1672.6 | 1672.8 | 1670.2 | 1672.7 | 1672.8 |
| 215 | 1764.9 | 1764.7 | 1764.9 | 1765.2 | 1764.7 | 1764.9 |
| 216 | 2321.8 | 2321.8 | 2321.7 | 2322.0 | 2321.7 | 2321.6 |
| 217 | 3029.4 | 3029.1 | 3029.7 | 3029.4 | 3029.8 | 3029.2 |
| 218 | 3040.4 | 3039.8 | 3040.4 | 3040.1 | 3040.4 | 3039.9 |
| 219 | 3065.0 | 3065.1 | 3065.3 | 3065.8 | 3065.0 | 3065.1 |
| 220 | 3124.8 | 3125.6 | 3126.2 | 3124.8 | 3126.3 | 3125.4 |
| 221 | 3129.0 | 3128.7 | 3128.8 | 3128.3 | 3128.3 | 3127.8 |
| 222 | 3136.9 | 3138.7 | 3138.1 | 3140.7 | 3138.2 | 3136.6 |
| 223 | 3144.7 | 3146.2 | 3146.0 | 3144.1 | 3145.3 | 3143.2 |
| 224 | 3146.2 | 3146.3 | 3146.5 | 3146.3 | 3146.1 | 3146.2 |
| 225 | 3161.1 | 3161.1 | 3161.6 | 3163.5 | 3161.1 | 3160.8 |
| 226 | 3163.3 | 3163.5 | 3163.7 | 3165.3 | 3163.3 | 3163.6 |
| 227 | 3165.5 | 3165.5 | 3165.5 | 3169.5 | 3165.6 | 3165.5 |
| 228 | 3170.8 | 3169.4 | 3169.8 | 3170.9 | 3170.8 | 3169.4 |
| 229 | 3172.5 | 3172.6 | 3172.5 | 3172.3 | 3172.6 | 3172.5 |
| 230 | 3175.6 | 3177.0 | 3176.5 | 3173.2 | 3176.4 | 3175.1 |
| 231 | 3178.1 | 3177.2 | 3177.9 | 3175.3 | 3177.8 | 3178.1 |
| 232 | 3180.9 | 3181.0 | 3181.1 | 3176.0 | 3180.7 | 3180.8 |
| 233 | 3184.2 | 3184.1 | 3183.9 | 3181.1 | 3184.4 | 3184.0 |
| 234 | 3184.9 | 3184.8 | 3184.9 | 3184.8 | 3184.8 | 3184.9 |
| 235 | 3185.7 | 3185.7 | 3185.6 | 3185.9 | 3186.1 | 3185.9 |
| 236 | 3190.9 | 3190.8 | 3190.9 | 3190.8 | 3190.8 | 3190.9 |
| 237 | 3192.2 | 3192.3 | 3192.2 | 3192.3 | 3192.7 | 3192.2 |
| 238 | 3193.7 | 3193.8 | 3193.7 | 3192.8 | 3193.8 | 3193.8 |
| 239 | 3195.3 | 3195.0 | 3195.4 | 3194.2 | 3195.2 | 3195.3 |
| 240 | 3195.4 | 3195.3 | 3195.4 | 3195.2 | 3195.4 | 3195.3 |
| 241 | 3196.4 | 3197.5 | 3196.4 | 3196.4 | 3197.7 | 3197.2 |
| 242 | 3215.8 | 3216.1 | 3216.8 | 3216.1 | 3217.7 | 3219.4 |
| 243 | 3243.9 | 3244.0 | 3244.4 | 3245.8 | 3244.0 | 3242.8 |
| 244 | 3255.9 | 3256.0 | 3255.8 | 3255.9 | 3256.0 | 3256.1 |
| 245 | 3572.0 | 3572.1 | 3571.7 | 3570.4 | 3571.9 | 3572.5 |
| 246 | 3762.1 | 3760.7 | 3761.3 | 3761.3 | 3761.2 | 3761.5 |

## Reference

- [S1]F. Xu, K. Gong, W. Fan, D. Liu, W. Li, L. Wang and X. Zhou. J-aggregated dyes for dye-sensitized solar cells: Suppressing aggregation-induced excited state quenching by intramolecular charge separation. *ACS Appl. Energy Mater.*, 2022, 5, 13780-13790.
